# Supplementary material for: RNA-sequencing of single cholangiocyte-derived organoids reveals high organoid-to organoid variability
Source: Life Sci Alliance. 2022 Aug 1;5(12):e202101340. doi: 10.26508/lsa.202101340 (PMC9348635; doi:10.26508/lsa.202101340)
Supplement: Supplementary file 3 [file LSA-2021-01340_TableS3.xlsx]

## Sheet: Organoid_revision_data_DEGs_p4_
logFC	AveExpr	t	P.Value	adj.P.Val	B	GeneID	GeneName	Early_minus_Late
-4.6914	0.455797	-3.49134	0.00528792	0.0337102	-2.08188	ENSMUSG00000059668	Krt4	-1
-4.13194	0.939137	-4.26329	0.00143435	0.0154307	-1.0426	ENSMUSG00000025813	Homer2	-1
-3.95308	-0.691263	-4.60724	0.000821352	0.0110682	-0.940068	ENSMUSG00000031163	Glod5	-1
-3.92284	0.380187	-5.55139	0.000193588	0.0050754	0.114339	ENSMUSG00000050866	Clrn3	-1
-3.81276	-0.473086	-5.39575	0.000243532	0.00585712	-0.186696	ENSMUSG00000066456	Hmgn3	-1
-3.79815	-0.414063	-5.9788	0.000104894	0.00380219	0.274839	ENSMUSG00000053765	Oas1f	-1
-3.67742	0.772203	-4.39044	0.00116504	0.0134952	-0.882159	ENSMUSG00000027015	Cybrd1	-1
-3.60935	0.306434	-3.18403	0.00903388	0.0465488	-2.45235	ENSMUSG00000023057	Fabp2	-1
-3.59869	-0.552165	-5.08647	0.000388215	0.00751169	-0.477198	ENSMUSG00000026817	Ak1	-1
-3.39078	-1.06241	-4.83156	0.000576015	0.0091826	-0.804263	ENSMUSG00000020469	Myl7	-1
-3.35649	-0.203381	-3.53717	0.00488513	0.0322825	-2.07635	ENSMUSG00000051359	Ncald	-1
-3.34776	0.32329	-3.89698	0.00264154	0.0222635	-1.56799	ENSMUSG00000034918	Cdhr2	-1
-3.31318	-1.16519	-4.57272	0.000867994	0.0113459	-1.07788	ENSMUSG00000028024	Enpep	-1
-3.2628	8.41687	-17.9431	2.6464e-09	1.81781e-05	11.6452	ENSMUSG00000043501	Lgals2	-1
-3.1726	-0.655371	-4.89435	0.00052222	0.0086933	-0.699331	ENSMUSG00000018927	Ccl6	-1
-3.15825	-0.0730392	-3.29317	0.0074635	0.0412942	-2.35696	ENSMUSG00000113346	Eprn	-1
-3.15279	0.880883	-4.74723	0.000657666	0.00978875	-0.386151	ENSMUSG00000031209	Heph	-1
-3.15215	0.611025	-3.20123	0.00876559	0.0456316	-2.38206	ENSMUSG00000029811	Aoc1	-1
-3.12693	1.36604	-3.44234	0.00575655	0.0354158	-2.00349	ENSMUSG00000025401	Myo1a	-1
-3.09849	-0.640454	-4.70984	0.000697699	0.0101289	-0.865912	ENSMUSG00000022218	Tgm1	-1
-3.05328	-0.360487	-3.25826	0.00793289	0.0428784	-2.42473	ENSMUSG00000030838	Ush1c	-1
-3.0165	-0.10354	-4.16809	0.00167833	0.0169022	-1.34807	ENSMUSG00000041046	Ramp3	-1
-2.93634	5.98431	-11.7523	1.95764e-07	0.0002338	7.68499	ENSMUSG00000020649	Rrm2	-1
-2.90723	-0.415163	-3.37525	0.00646832	0.0377332	-2.29243	ENSMUSG00000030200	Bcl2l14	-1
-2.89272	5.8682	-9.24392	2.04429e-06	0.000652658	5.4704	ENSMUSG00000061718	Ppp1r1b	-1
-2.8787	5.14882	-10.9538	3.9299e-07	0.000257177	6.95535	ENSMUSG00000040204	Pclaf	-1
-2.80348	4.59449	-7.96762	8.27442e-06	0.00110363	4.09793	ENSMUSG00000029646	Cdx2	-1
-2.75055	1.22023	-6.59876	4.50734e-05	0.00250109	1.66436	ENSMUSG00000046057	Gm15428	-1
-2.65833	-0.786018	-3.9728	0.00232477	0.0205767	-1.64502	ENSMUSG00000099583	Hist1h3d	-1
-2.59152	1.35609	-3.7374	0.00346384	0.025975	-1.58281	ENSMUSG00000046997	Spsb4	-1
-2.59144	1.9975	-6.81466	3.39856e-05	0.0022233	2.30528	ENSMUSG00000058773	Hist1h1b	-1
-2.56589	1.27791	-5.07662	0.000394111	0.00757603	0.152028	ENSMUSG00000049916	2610318N02Rik	-1
-2.55237	0.837789	-3.24912	0.00806073	0.0432742	-2.30375	ENSMUSG00000032327	Stra6	-1
-2.54466	4.05344	-6.01137	0.000100212	0.00375474	1.70827	ENSMUSG00000021456	Fbp2	-1
-2.53574	-0.155804	-3.77942	0.00322437	0.0248577	-1.76921	ENSMUSG00000038580	Sct	-1
-2.53199	-1.00338	-3.52185	0.0050161	0.0327992	-2.18172	ENSMUSG00000028635	Edn2	-1
-2.53147	-0.104619	-3.60901	0.00431623	0.0298873	-1.95739	ENSMUSG00000024730	Ms4a8a	-1
-2.48006	4.76368	-5.94477	0.000110036	0.00384938	1.58324	ENSMUSG00000026149	Tm4sf20	-1
-2.47448	1.99373	-5.31411	0.000275069	0.00631741	0.637075	ENSMUSG00000034883	Lrr1	-1
-2.4442	-0.0893807	-3.26025	0.00790531	0.0427909	-2.37936	ENSMUSG00000090700	Cyp4f40	-1
-2.44152	-0.130639	-3.19558	0.00885283	0.0458944	-2.4679	ENSMUSG00000043430	Psapl1	-1
-2.42419	-0.024755	-3.34514	0.0068166	0.0390845	-2.27231	ENSMUSG00000019122	Ccl9	-1
-2.37901	5.1382	-12.3318	1.2108e-07	0.000207925	8.02599	ENSMUSG00000027715	Ccna2	-1
-2.37251	6.29283	-12.3546	1.18862e-07	0.000207925	8.18515	ENSMUSG00000027875	Hmgcs2	-1
-2.34407	-0.0906265	-3.41792	0.00600585	0.0362993	-2.19272	ENSMUSG00000106248	Gm9728	-1
-2.2818	1.76273	-3.59708	0.00440572	0.030248	-1.76536	ENSMUSG00000098207	Arl14	-1
-2.27906	1.74521	-3.17681	0.00914895	0.0469161	-2.40616	ENSMUSG00000032033	Barx2	-1
-2.27487	1.9664	-5.16148	0.000346269	0.00704748	0.447112	ENSMUSG00000068205	Macrod2	-1
-2.2504	1.33049	-5.68978	0.000158306	0.00458134	0.904139	ENSMUSG00000027199	Gatm	-1
-2.24769	1.36349	-5.58849	0.000183375	0.00493962	0.816949	ENSMUSG00000071478	Hist1h2ad	-1
-2.23253	-0.887183	-3.32833	0.00701922	0.0397817	-2.39957	ENSMUSG00000097892	Gm26801	-1
-2.21013	4.0432	-4.49544	0.000982804	0.0121528	-0.52955	ENSMUSG00000044303	Cdkn2a	-1
-2.18711	-0.697294	-3.1434	0.00970134	0.0489242	-2.59625	ENSMUSG00000113128	Gm47813	-1
-2.18482	1.85442	-3.21312	0.00858503	0.0450673	-2.36634	ENSMUSG00000023247	Guca2a	-1
-2.18173	2.48558	-6.46244	5.40363e-05	0.00271923	2.1511	ENSMUSG00000017499	Cdc6	-1
-2.1786	3.12475	-6.23225	7.38064e-05	0.00316821	1.97045	ENSMUSG00000027654	Fam83d	-1
-2.17708	3.0238	-5.62872	0.000172947	0.00476778	1.18615	ENSMUSG00000002068	Ccne1	-1
-2.1673	-0.284286	-3.64011	0.00409163	0.0288294	-1.95964	ENSMUSG00000085628	Appbp2os	-1
-2.14938	6.60442	-6.23329	7.37013e-05	0.00316821	1.86797	ENSMUSG00000003038	Hmgn2	-1
-2.14119	3.26232	-8.08396	7.23509e-06	0.00104591	4.05935	ENSMUSG00000021876	Rnase4	-1
-2.12237	1.49539	-3.77707	0.00323734	0.0249252	-1.50606	ENSMUSG00000032221	Mns1	-1
-2.12027	4.77946	-8.84869	3.09917e-06	0.000788453	5.04158	ENSMUSG00000005470	Asf1b	-1
-2.10006	-0.147099	-3.45328	0.00564833	0.0351453	-2.14907	ENSMUSG00000053846	Lipg	-1
-2.09824	2.46637	-6.83683	3.3025e-05	0.00218124	2.57368	ENSMUSG00000043155	Hpdl	-1
-2.0969	4.68121	-11.042	3.63104e-07	0.000257177	6.99085	ENSMUSG00000030867	Plk1	-1
-2.08919	6.77193	-11.478	2.47526e-07	0.000242894	7.52412	ENSMUSG00000017716	Birc5	-1
-2.08584	2.17384	-4.58987	0.000844486	0.0111984	-0.296852	ENSMUSG00000032719	Sbspon	-1
-2.0796	4.01798	-9.38639	1.76565e-06	0.000591624	5.46123	ENSMUSG00000020808	Pimreg	-1
-2.07771	3.07074	-5.67832	0.000160951	0.00459373	1.25453	ENSMUSG00000017607	Tns4	-1
-2.06139	2.71095	-8.24325	6.03439e-06	0.000952878	4.05141	ENSMUSG00000112926	Gm7172	-1
-2.05522	-0.34261	-3.17247	0.00921881	0.0471364	-2.52265	ENSMUSG00000013091	Tmem190	-1
-2.05501	2.49212	-4.12207	0.0018115	0.0176125	-0.985312	ENSMUSG00000053062	Jam2	-1
-2.04758	0.56189	-4.27884	0.00139817	0.0151483	-0.976062	ENSMUSG00000044912	Syt16	-1
-2.0364	0.468243	-3.875	0.00274156	0.0226851	-1.4978	ENSMUSG00000074865	Zfp934	-1
-2.03066	2.12108	-4.4457	0.00106507	0.0128689	-0.503105	ENSMUSG00000046179	E2f8	-1
-2.01274	0.496018	-3.44853	0.00569509	0.0352325	-2.04841	ENSMUSG00000047986	Palm3	-1
-2.00848	1.15683	-3.67624	0.00384573	0.0275745	-1.67135	ENSMUSG00000021485	Mxd3	-1
-1.99258	4.9412	-10.8548	4.29732e-07	0.000257177	6.88571	ENSMUSG00000022033	Pbk	-1
-1.99093	0.783656	-3.55056	0.00477349	0.031865	-1.87885	ENSMUSG00000046295	Ankle1	-1
-1.97734	3.10813	-4.91352	0.000506871	0.00856507	0.180633	ENSMUSG00000038811	Gngt2	-1
-1.97324	0.638965	-4.06198	0.00200219	0.0188398	-1.21714	ENSMUSG00000048992	Prss32	-1
-1.96881	11.0074	-11.9213	1.69817e-07	0.0002338	7.89139	ENSMUSG00000053964	Lgals4	-1
-1.96396	6.04386	-15.4784	1.21073e-08	5.54432e-05	10.1983	ENSMUSG00000006398	Cdc20	-1
-1.96212	1.05879	-4.17024	0.00167236	0.0168933	-0.998348	ENSMUSG00000037994	Slc9b2	-1
-1.96191	0.281329	-3.73628	0.00347047	0.0259822	-1.70462	ENSMUSG00000028175	Depdc1a	-1
-1.95892	4.55189	-10.2404	7.60433e-07	0.000373101	6.31498	ENSMUSG00000094248	Hist1h2ao	-1
-1.9554	1.05871	-3.38169	0.00639629	0.0374243	-2.09198	ENSMUSG00000030483	Cyp2b10	-1
-1.93412	2.88608	-5.98497	0.000103989	0.00379141	1.64251	ENSMUSG00000044201	Cdc25c	-1
-1.9241	4.76195	-7.75168	1.06567e-05	0.00124523	3.86524	ENSMUSG00000020897	Aurkb	-1
-1.92387	2.00582	-5.77379	0.000140289	0.00434075	1.24121	ENSMUSG00000024989	Cep55	-1
-1.91855	0.904396	-3.96511	0.00235502	0.020726	-1.28761	ENSMUSG00000094627	Gm10182	-1
-1.90065	4.03536	-7.55636	1.34568e-05	0.00141122	3.61853	ENSMUSG00000026955	Sapcd2	-1
-1.89532	5.15382	-12.7262	8.82925e-08	0.000207925	8.33076	ENSMUSG00000027496	Aurka	-1
-1.89523	6.86462	-9.22091	2.09359e-06	0.000652658	5.44765	ENSMUSG00000032246	Calml4	-1
-1.8922	3.88018	-5.36462	0.00025508	0.00599024	0.805513	ENSMUSG00000040990	Sh3kbp1	-1
-1.88286	3.92001	-3.39382	0.00626277	0.0370034	-2.34152	ENSMUSG00000054200	Ffar4	-1
-1.87233	2.33177	-4.90587	0.000512938	0.00860408	0.163117	ENSMUSG00000022422	Dscc1	-1
-1.87128	3.14857	-8.45406	4.76515e-06	0.00088139	4.40948	ENSMUSG00000036223	Ska1	-1
-1.86488	5.0396	-6.48321	5.25557e-05	0.00270416	2.29373	ENSMUSG00000070713	Gm10282	-1
-1.8554	6.07399	-10.944	3.96444e-07	0.000257177	7.05583	ENSMUSG00000072235	Tuba1a	-1
-1.84394	2.6538	-5.71358	0.000152965	0.00449023	1.2742	ENSMUSG00000076117	Mir680-2	-1
-1.84359	7.16667	-3.40964	0.00609284	0.036543	-2.66534	ENSMUSG00000000983	Wfdc18	-1
-1.84303	2.44664	-4.30331	0.00134316	0.0148093	-0.709569	ENSMUSG00000028678	Kif2c	-1
-1.83537	6.68708	-11.0124	3.72837e-07	0.000257177	7.13236	ENSMUSG00000023832	Acat2	-1
-1.81667	2.90758	-3.37167	0.00650877	0.0378567	-2.21997	ENSMUSG00000037145	2210407C18Rik	-1
-1.81648	0.471823	-3.53741	0.0048831	0.0322825	-1.92559	ENSMUSG00000036902	Neto2	-1
-1.81547	0.897365	-3.32507	0.00705926	0.0398931	-2.179	ENSMUSG00000028100	Nudt17	-1
-1.80854	1.06785	-3.25167	0.00802482	0.0431656	-2.2803	ENSMUSG00000095304	Plac9a	-1
-1.80099	4.8965	-8.48373	4.61104e-06	0.000879812	4.67358	ENSMUSG00000025574	Tk1	-1
-1.80094	2.18961	-5.23983	0.000307548	0.00671842	0.604471	ENSMUSG00000037991	Rmi2	-1
-1.79475	1.28394	-4.0102	0.00218337	0.0199436	-1.17997	ENSMUSG00000051378	Kif18b	-1
-1.77248	7.75933	-11.0898	3.47949e-07	0.000257177	7.20819	ENSMUSG00000023004	Tuba1b	-1
-1.77156	3.66357	-3.26527	0.00783623	0.0426184	-2.52507	ENSMUSG00000031886	Ces2e	-1
-1.77105	3.17854	-7.74859	1.06957e-05	0.00124523	3.72154	ENSMUSG00000078521	Aunip	-1
-1.76949	2.60089	-3.83913	0.00291328	0.0233777	-1.4382	ENSMUSG00000074217	2210011C24Rik	-1
-1.76746	5.31218	-9.75447	1.21906e-06	0.00047587	5.95709	ENSMUSG00000041431	Ccnb1	-1
-1.76457	1.63114	-4.69084	0.000719024	0.010327	-0.197357	ENSMUSG00000107092	Gm7993	-1
-1.76435	1.16336	-3.51846	0.00504559	0.0328981	-1.88847	ENSMUSG00000024810	Il33	-1
-1.76319	2.22287	-5.04995	0.000410562	0.00766954	0.355747	ENSMUSG00000080076	Hist1h2aj	-1
-1.76287	3.61674	-7.62688	1.23636e-05	0.00134803	3.66247	ENSMUSG00000027490	E2f1	-1
-1.76264	3.36534	-6.70807	3.90402e-05	0.0023218	2.58382	ENSMUSG00000019773	Fbxo5	-1
-1.7592	4.10005	-8.70853	3.60457e-06	0.000836048	4.846	ENSMUSG00000063021	Hist1h2ak	-1
-1.75635	3.49218	-6.64588	4.23582e-05	0.00245535	2.51776	ENSMUSG00000098318	Lockd	-1
-1.75091	1.87322	-3.864	0.0027931	0.0228675	-1.36485	ENSMUSG00000034773	BC030867	-1
-1.74489	4.10493	-7.02835	2.58477e-05	0.00185914	3.0065	ENSMUSG00000030008	Pradc1	-1
-1.74209	1.30009	-3.97693	0.00230872	0.0205156	-1.22794	ENSMUSG00000087060	Eldr	-1
-1.73829	1.56896	-3.48371	0.00535823	0.0340164	-1.93615	ENSMUSG00000004655	Aqp1	-1
-1.73493	4.971	-8.34304	5.39316e-06	0.000892666	4.5251	ENSMUSG00000037313	Tacc3	-1
-1.73456	3.36624	-3.73478	0.00347936	0.0260204	-1.69171	ENSMUSG00000028713	Cyp4b1	-1
-1.73371	5.8768	-3.83879	0.00291498	0.0233777	-1.831	ENSMUSG00000022026	Olfm4	-1
-1.73175	0.148438	-3.3825	0.00638727	0.0374034	-2.17714	ENSMUSG00000105402	Gm3716	-1
-1.73003	4.90434	-9.41353	1.7174e-06	0.000591624	5.61076	ENSMUSG00000023015	Racgap1	-1
-1.7181	4.22049	-7.44509	1.53992e-05	0.00150039	3.50237	ENSMUSG00000031821	Gins2	-1
-1.70777	1.59027	-3.30685	0.00728728	0.0406466	-2.20436	ENSMUSG00000085972	1110028F11Rik	-1
-1.70689	1.14104	-4.2155	0.00155182	0.0161384	-0.911313	ENSMUSG00000036875	Dna2	-1
-1.70356	4.94482	-7.36554	1.69726e-05	0.00153496	3.41105	ENSMUSG00000037628	Cdkn3	-1
-1.70191	1.29234	-3.98905	0.00226218	0.0202782	-1.2088	ENSMUSG00000116475	AC110211.2	-1
-1.69893	1.5017	-4.22143	0.00153671	0.016042	-0.857408	ENSMUSG00000094017	Gm13160	-1
-1.67474	2.55982	-4.13785	0.00176464	0.0174533	-0.966086	ENSMUSG00000030346	Rad51ap1	-1
-1.67422	3.89105	-6.47601	5.3064e-05	0.00271524	2.31781	ENSMUSG00000027323	Rad51	-1
-1.66327	7.32902	-11.8946	1.73653e-07	0.0002338	7.87396	ENSMUSG00000094777	Hist1h2ap	-1
-1.6555	5.25687	-8.16008	6.63189e-06	0.000979666	4.32632	ENSMUSG00000020739	Nup85	-1
-1.64312	3.321	-4.28859	0.00137598	0.0150144	-0.792573	ENSMUSG00000025150	Cbr2	-1
-1.63893	1.28902	-3.50075	0.00520248	0.0334386	-1.91072	ENSMUSG00000027876	Reg4	-1
-1.63605	5.12672	-10.3213	7.04224e-07	0.000372101	6.46264	ENSMUSG00000021811	Dnajc9	-1
-1.63251	3.47909	-6.25483	7.15613e-05	0.00316112	2.02798	ENSMUSG00000021569	Trip13	-1
-1.6312	4.32561	-7.46841	1.49685e-05	0.001485	3.53301	ENSMUSG00000025395	Prim1	-1
-1.62789	2.2649	-3.68875	0.00376421	0.0271886	-1.65227	ENSMUSG00000017697	Ada	-1
-1.61603	5.33487	-10.9053	4.10522e-07	0.000257177	6.98049	ENSMUSG00000068101	Cenpm	-1
-1.61011	2.30563	-4.35081	0.00124277	0.0141217	-0.637559	ENSMUSG00000085042	Abhd11os	-1
-1.60693	2.27965	-4.52733	0.000933603	0.0117776	-0.377403	ENSMUSG00000042489	Clspn	-1
-1.60517	1.26934	-3.18631	0.00899788	0.0464361	-2.38021	ENSMUSG00000112290	Gm33782	-1
-1.59171	3.89586	-7.57408	1.31726e-05	0.00139204	3.63478	ENSMUSG00000030493	Faap24	-1
-1.58985	5.33538	-9.78858	1.1786e-06	0.00047587	5.99227	ENSMUSG00000029363	Rfc5	-1
-1.58409	3.93943	-4.80845	0.000597269	0.0092715	-0.033449	ENSMUSG00000050410	Tcf19	-1
-1.5644	1.95212	-5.20497	0.000324174	0.00687269	0.536213	ENSMUSG00000032400	Zwilch	-1
-1.56358	3.37231	-5.06296	0.000402449	0.00764709	0.388281	ENSMUSG00000021062	Rab15	-1
-1.56107	1.60936	-4.06734	0.00198437	0.0187234	-1.06902	ENSMUSG00000051220	Ercc6l	-1
-1.55578	3.11462	-3.80652	0.00307916	0.0241309	-1.53987	ENSMUSG00000095539	Gm25287	-1
-1.55355	1.57063	-3.77003	0.00327636	0.0250616	-1.50688	ENSMUSG00000058258	Idi1	-1
-1.5391	4.83467	-6.73028	3.79241e-05	0.00231556	2.62278	ENSMUSG00000005410	Mcm5	-1
-1.5328	5.60094	-7.28222	1.88079e-05	0.00163274	3.28808	ENSMUSG00000032218	Ccnb2	-1
-1.52933	5.76783	-3.50059	0.00520393	0.0334386	-2.41233	ENSMUSG00000024029	Tff3	-1
-1.52767	0.894629	-3.30994	0.00724812	0.0404611	-2.20068	ENSMUSG00000021120	Pigh	-1
-1.5271	3.68225	-4.61635	0.00080949	0.0109349	-0.309893	ENSMUSG00000029591	Ung	-1
-1.51913	2.58617	-5.04312	0.000414885	0.00770675	0.369817	ENSMUSG00000031756	Cenpn	-1
-1.51826	5.31071	-7.07045	2.4507e-05	0.00183977	3.03573	ENSMUSG00000030978	Rrm1	-1
-1.51772	7.40793	-5.95843	0.00010794	0.00384572	1.44424	ENSMUSG00000032060	Cryab	-1
-1.51064	6.17905	-10.8527	4.30563e-07	0.000257177	6.98435	ENSMUSG00000114603	Gm17938	-1
-1.50906	2.18142	-4.4878	0.000994997	0.0122375	-0.436667	ENSMUSG00000055407	Map6	-1
-1.50628	5.97915	-8.63913	3.88723e-06	0.000836048	4.84347	ENSMUSG00000001473	Tubb6	-1
-1.50561	4.6533	-6.79156	3.50182e-05	0.00224804	2.70772	ENSMUSG00000041859	Mcm3	-1
-1.50504	3.61952	-4.55608	0.000891455	0.0115159	-0.397229	ENSMUSG00000073705	Cenps	-1
-1.50411	1.50343	-3.97084	0.00233245	0.0206066	-1.21447	ENSMUSG00000041954	Tnfrsf18	-1
-1.50277	5.58223	-6.30258	6.70501e-05	0.00307851	2.01284	ENSMUSG00000112808	Gm4739	-1
-1.5016	1.51258	-4.17946	0.00164705	0.0167982	-0.914957	ENSMUSG00000029499	Pxmp2	-1
-1.49916	4.80345	-7.36503	1.69831e-05	0.00153496	3.41222	ENSMUSG00000021707	Dhfr	-1
-1.49738	5.70212	-8.75889	3.41341e-06	0.000810196	4.9738	ENSMUSG00000114547	Gm3226	-1
-1.49174	3.93565	-7.73319	1.08927e-05	0.00125751	3.81495	ENSMUSG00000036186	Fam69b	-1
-1.48959	4.12477	-5.00623	0.000439117	0.00793762	0.249625	ENSMUSG00000001228	Uhrf1	-1
-1.48646	5.3108	-5.75189	0.000144764	0.00437186	1.25568	ENSMUSG00000028832	Stmn1	-1
-1.48084	6.50492	-10.0438	9.18355e-07	0.000406979	6.25864	ENSMUSG00000049932	H2afx	-1
-1.4807	5.24519	-7.13154	2.26927e-05	0.00179087	3.11452	ENSMUSG00000029910	Mad2l1	-1
-1.4757	5.95396	-8.31143	5.58791e-06	0.000903137	4.48493	ENSMUSG00000023505	Cdca3	-1
-1.47544	4.55557	-7.98134	8.1439e-06	0.00110363	4.12146	ENSMUSG00000074825	Itpripl1	-1
-1.47408	0.878526	-3.59713	0.00440535	0.030248	-1.79301	ENSMUSG00000028587	Orc1	-1
-1.47073	4.37074	-5.2455	0.000304929	0.00671333	0.58857	ENSMUSG00000022673	Mcm4	-1
-1.46681	3.86317	-7.19485	2.09644e-05	0.001735	3.19859	ENSMUSG00000082809	Gm14150	-1
-1.46574	6.83526	-11.0943	3.46555e-07	0.000257177	7.2064	ENSMUSG00000027203	Dut	-1
-1.46294	1.39462	-3.51054	0.00511511	0.0331	-1.89507	ENSMUSG00000054115	Skp2	-1
-1.46227	6.10947	-8.38691	5.13493e-06	0.000889716	4.56569	ENSMUSG00000024007	Ppil1	-1
-1.46006	6.61222	-10.1117	8.60105e-07	0.000393871	6.32312	ENSMUSG00000001270	Ckb	-1
-1.45985	6.73131	-7.87688	9.19697e-06	0.00117439	3.9678	ENSMUSG00000054717	Hmgb2	-1
-1.45321	0.613156	-3.37477	0.00647371	0.0377486	-2.12553	ENSMUSG00000011382	Dhdh	-1
-1.44599	2.66285	-4.65695	0.000758785	0.0105751	-0.18727	ENSMUSG00000032586	Traip	-1
-1.44594	2.57677	-4.4021	0.00114315	0.013377	-0.566421	ENSMUSG00000024791	Cdca5	-1
-1.43692	6.92001	-10.157	8.23492e-07	0.000390108	6.36656	ENSMUSG00000029177	Cenpa	-1
-1.43483	1.57953	-4.13576	0.00177077	0.0174687	-0.971371	ENSMUSG00000036109	Mbnl3	-1
-1.42903	6.61107	-7.82911	9.72673e-06	0.00120384	3.91403	ENSMUSG00000025747	Tyms	-1
-1.42536	4.48608	-6.18334	7.89335e-05	0.00323698	1.91513	ENSMUSG00000056394	Lig1	-1
-1.41482	6.33375	-9.35393	1.8253e-06	0.000597048	5.58564	ENSMUSG00000028873	Cdca8	-1
-1.41288	2.54315	-5.02081	0.000429365	0.00786483	0.338163	ENSMUSG00000022938	Fam3b	-1
-1.40824	3.04175	-5.92927	0.000112467	0.00386199	1.59104	ENSMUSG00000026622	Nek2	-1
-1.4078	2.1542	-4.42594	0.00109975	0.0131232	-0.526941	ENSMUSG00000099997	Tubb4b-ps2	-1
-1.40703	2.22759	-3.49821	0.00522541	0.0335128	-1.95114	ENSMUSG00000022322	Shcbp1	-1
-1.40597	2.70639	-3.81808	0.00301925	0.0239245	-1.48758	ENSMUSG00000026414	Tnnt2	-1
-1.40424	5.06343	-7.1228	2.29431e-05	0.00179087	3.1097	ENSMUSG00000074476	Spc24	-1
-1.40174	5.52198	-10.3813	6.65471e-07	0.00036569	6.54492	ENSMUSG00000020186	Csrp2	-1
-1.4011	2.983	-4.93809	0.000487899	0.00836798	0.218831	ENSMUSG00000040749	Siah1b	-1
-1.40037	1.40097	-3.31594	0.00717256	0.0402326	-2.18709	ENSMUSG00000017861	Mybl2	-1
-1.39567	3.26119	-4.39333	0.00115958	0.0134774	-0.621171	ENSMUSG00000095865	Gm13237	-1
-1.3949	1.61164	-3.27538	0.00769904	0.0421896	-2.25688	ENSMUSG00000027811	4930579G24Rik	-1
-1.39226	3.8277	-4.67407	0.000738422	0.0104347	-0.235288	ENSMUSG00000072082	Ccnf	-1
-1.3908	3.89322	-5.87249	0.000121876	0.00401518	1.51652	ENSMUSG00000046598	Bdh1	-1
-1.38741	2.40969	-4.67384	0.000738682	0.0104347	-0.161563	ENSMUSG00000032783	Troap	-1
-1.38567	1.71423	-3.65129	0.00401385	0.0284385	-1.68536	ENSMUSG00000071547	Nt5dc2	-1
-1.37999	2.30299	-5.0197	0.000430101	0.0078678	0.325877	ENSMUSG00000078762	Haus5	-1
-1.37713	6.77551	-11.6239	2.18365e-07	0.0002338	7.64815	ENSMUSG00000019942	Cdk1	-1
-1.37287	2.33417	-4.30635	0.00133649	0.0147704	-0.704969	ENSMUSG00000001517	Foxm1	-1
-1.36663	3.686	-6.61997	4.38291e-05	0.00250109	2.49735	ENSMUSG00000091269	Gm6682	-1
-1.36452	4.70684	-5.95013	0.000109209	0.00384938	1.58011	ENSMUSG00000046623	Gjb4	-1
-1.36272	1.07562	-3.46202	0.00556335	0.0349152	-1.97204	ENSMUSG00000113926	Gm3565	-1
-1.35507	7.34398	-7.60737	1.26561e-05	0.00135836	3.63373	ENSMUSG00000031168	Ebp	-1
-1.3526	3.83763	-5.76714	0.000141633	0.00436795	1.37279	ENSMUSG00000063445	Nmral1	-1
-1.3472	2.42252	-4.59124	0.000842629	0.0111846	-0.28206	ENSMUSG00000072115	Ang	-1
-1.34554	4.50836	-6.34202	6.35541e-05	0.00296975	2.1268	ENSMUSG00000000751	Rpa1	-1
-1.34494	4.52068	-5.92912	0.000112491	0.00386199	1.56294	ENSMUSG00000028884	Rpa2	-1
-1.34276	2.08186	-4.14069	0.00175634	0.0173837	-0.950247	ENSMUSG00000043587	Pxylp1	-1
-1.34182	5.65766	-8.82732	3.17102e-06	0.000792062	5.04591	ENSMUSG00000032397	Tipin	-1
-1.33884	4.28794	-3.32283	0.00708687	0.0399718	-2.5196	ENSMUSG00000037621	Atoh8	-1
-1.3343	1.97085	-4.25466	0.00145484	0.0155758	-0.781441	ENSMUSG00000038379	Ttk	-1
-1.33333	5.54714	-7.71132	1.1179e-05	0.00127981	3.80602	ENSMUSG00000041939	Mvk	-1
-1.3307	1.31093	-3.16273	0.00937772	0.047786	-2.41731	ENSMUSG00000015342	Xk	-1
-1.32681	1.76925	-3.67723	0.00383926	0.0275568	-1.64851	ENSMUSG00000061619	Vma21-ps	-1
-1.32643	1.40897	-3.71148	0.00362067	0.0266278	-1.59651	ENSMUSG00000021176	Efcab11	-1
-1.32623	4.23904	-6.74132	3.7382e-05	0.00231157	2.6529	ENSMUSG00000030677	Kif22	-1
-1.32589	1.66156	-3.9219	0.00253275	0.0217222	-1.27933	ENSMUSG00000032113	Chek1	-1
-1.32542	2.35907	-3.78225	0.00320887	0.0247582	-1.51599	ENSMUSG00000030630	Fah	-1
-1.32487	4.6104	-6.39424	5.92229e-05	0.00283486	2.19153	ENSMUSG00000029730	Mcm7	-1
-1.3227	3.5714	-5.42541	0.000233051	0.0057444	0.903106	ENSMUSG00000035683	Melk	-1
-1.31994	3.07009	-5.55309	0.000193107	0.00507248	1.08923	ENSMUSG00000081671	Gm13167	-1
-1.31904	1.36312	-3.25208	0.00801916	0.0431613	-2.28328	ENSMUSG00000020974	Pole2	-1
-1.31765	4.151	-7.28229	1.88063e-05	0.00163274	3.31251	ENSMUSG00000034906	Ncaph	-1
-1.3168	3.45351	-5.16911	0.000342279	0.00701824	0.53829	ENSMUSG00000091721	Gimd1	-1
-1.31551	6.25582	-8.8548	3.07898e-06	0.000788453	5.07006	ENSMUSG00000006378	Gcat	-1
-1.31497	6.52302	-9.73428	1.24372e-06	0.00047587	5.96211	ENSMUSG00000036752	Tubb4b	-1
-1.31414	3.10552	-5.04943	0.000410888	0.00766954	0.377661	ENSMUSG00000069301	Hist1h2ag	-1
-1.31059	2.47457	-4.4907	0.000990349	0.0122022	-0.431544	ENSMUSG00000024301	Kifc5b	-1
-1.3096	3.80357	-6.50083	5.1333e-05	0.00267126	2.34935	ENSMUSG00000028551	Cdkn2c	-1
-1.30847	2.58069	-4.56581	0.000877662	0.0114396	-0.321294	ENSMUSG00000050107	Haspin	-1
-1.30749	6.78722	-7.33996	1.75145e-05	0.00157264	3.31422	ENSMUSG00000011884	Gltp	-1
-1.30714	4.0583	-4.89078	0.000525131	0.00872341	0.0771825	ENSMUSG00000035232	Pdk3	-1
-1.30257	2.25655	-3.44835	0.00569682	0.0352325	-2.03585	ENSMUSG00000026784	Pdss1	-1
-1.30099	3.27104	-5.13188	0.000362214	0.007275	0.491925	ENSMUSG00000048922	Cdca2	-1
-1.29552	4.06066	-5.37097	0.000252678	0.00596442	0.79653	ENSMUSG00000027469	Tpx2	-1
-1.29039	3.85778	-5.43802	0.000228738	0.00568247	0.906111	ENSMUSG00000021947	Cryl1	-1
-1.28804	4.57439	-4.90945	0.00051009	0.00858777	0.0543061	ENSMUSG00000045273	Cenph	-1
-1.28706	3.06225	-5.23865	0.000308095	0.00671842	0.650434	ENSMUSG00000027699	Ect2	-1
-1.28147	3.25843	-5.10194	0.000379143	0.00740921	0.448178	ENSMUSG00000000028	Cdc45	-1
-1.28028	2.35352	-4.54308	0.000910263	0.0116327	-0.352878	ENSMUSG00000039748	Exo1	-1
-1.27618	3.48554	-3.84025	0.00290778	0.0233673	-1.53851	ENSMUSG00000038252	Ncapd2	-1
-1.26915	1.45815	-3.3936	0.00626509	0.0370034	-2.07196	ENSMUSG00000026683	Nuf2	-1
-1.25902	7.0909	-10.5264	5.81013e-07	0.000332582	6.7079	ENSMUSG00000066878	Gm10184	-1
-1.25759	7.75683	-9.39176	1.75599e-06	0.000591624	5.61726	ENSMUSG00000021131	Erh	-1
-1.25603	3.7993	-6.53283	4.9191e-05	0.00258922	2.3901	ENSMUSG00000095159	Tubb4b-ps1	-1
-1.25224	3.66486	-6.43872	5.57829e-05	0.00277661	2.26876	ENSMUSG00000096472	Cdkn2d	-1
-1.25022	3.90026	-4.52936	0.000930557	0.0117753	-0.473868	ENSMUSG00000037408	Cnnm4	-1
-1.24694	12.7352	-6.12231	8.5871e-05	0.00345952	1.70465	ENSMUSG00000078664	Sprr2a1	-1
-1.24398	3.31387	-4.90788	0.00051134	0.00858777	0.158749	ENSMUSG00000003271	Sult2b1	-1
-1.24324	4.4963	-5.68441	0.00015954	0.00459373	1.21789	ENSMUSG00000025358	Cdk2	-1
-1.24014	3.9564	-5.76236	0.000142605	0.00437186	1.36128	ENSMUSG00000022978	Mis18a	-1
-1.23605	4.87506	-6.71013	3.89354e-05	0.0023218	2.59302	ENSMUSG00000005233	Spc25	-1
-1.23522	4.83014	-7.81836	9.85043e-06	0.00120826	3.94215	ENSMUSG00000027306	Nusap1	-1
-1.23402	3.13158	-5.88267	0.000120129	0.00397669	1.5346	ENSMUSG00000079553	Kifc1	-1
-1.23314	7.58184	-7.29371	1.85426e-05	0.00163274	3.24253	ENSMUSG00000044734	Serpinb1a	-1
-1.2331	2.73912	-4.70496	0.000703114	0.0101678	-0.118517	ENSMUSG00000103015	Gm37549	-1
-1.23307	6.16831	-8.64327	3.86971e-06	0.000836048	4.84459	ENSMUSG00000015749	Anp32e	-1
-1.22649	4.06526	-4.89792	0.000519322	0.00867003	0.0868086	ENSMUSG00000024269	Tpgs2	-1
-1.22613	4.68045	-5.12594	0.000365507	0.00728738	0.376162	ENSMUSG00000022945	Chaf1b	-1
-1.22563	5.79957	-6.20851	7.62487e-05	0.00320338	1.86525	ENSMUSG00000060288	Ppih	-1
-1.22551	2.0829	-3.91142	0.00257793	0.0219171	-1.29931	ENSMUSG00000018983	E2f2	-1
-1.22452	2.19693	-3.99529	0.00223864	0.0201331	-1.17484	ENSMUSG00000031155	Pim2	-1
-1.22323	3.89948	-5.76473	0.000142122	0.00436795	1.36674	ENSMUSG00000042606	Hirip3	-1
-1.22147	4.87685	-5.52784	0.000200386	0.00519518	0.95908	ENSMUSG00000022048	Dpysl2	-1
-1.21744	10.5207	-5.94613	0.000109826	0.00384938	1.43017	ENSMUSG00000068893	Sprr2a2	-1
-1.21647	6.72695	-9.01567	2.595e-06	0.00072118	5.23433	ENSMUSG00000020471	Pold2	-1
-1.21627	5.68316	-4.2809	0.00139344	0.0151232	-1.07889	ENSMUSG00000020577	Tspan13	-1
-1.21553	3.79344	-3.69819	0.00370389	0.0269126	-1.81607	ENSMUSG00000023909	Paqr4	-1
-1.21301	5.23026	-6.73439	3.77213e-05	0.00231346	2.60661	ENSMUSG00000062248	Cks2	-1
-1.21269	4.5472	-4.64656	0.000771432	0.0106192	-0.356709	ENSMUSG00000037979	Ccdc92	-1
-1.21075	4.86222	-5.31937	0.000272913	0.00631741	0.651423	ENSMUSG00000015217	Hmgb3	-1
-1.21001	4.313	-5.65835	0.000165669	0.00466385	1.19213	ENSMUSG00000021276	Cinp	-1
-1.2097	4.53341	-7.45347	1.52429e-05	0.00149576	3.51901	ENSMUSG00000089958	Gm16165	-1
-1.2085	4.97882	-7.37565	1.67632e-05	0.00153496	3.42065	ENSMUSG00000040658	Dnph1	-1
-1.2069	4.63469	-3.85933	0.00281523	0.0229637	-1.6644	ENSMUSG00000058022	Adtrp	-1
-1.20603	4.66782	-4.23583	0.00150065	0.0158584	-1.03739	ENSMUSG00000069808	Fam57a	-1
-1.2047	5.09517	-6.92272	2.95715e-05	0.00204147	2.85561	ENSMUSG00000024378	Stard4	-1
-1.2034	2.48134	-4.10117	0.00187557	0.0180312	-1.024	ENSMUSG00000081783	Gm15599	-1
-1.19858	3.57449	-4.46774	0.00102777	0.0125173	-0.538309	ENSMUSG00000038422	Hdhd3	-1
-1.19778	7.44616	-9.01345	2.60111e-06	0.00072118	5.22653	ENSMUSG00000001403	Ube2c	-1
-1.19674	6.77007	-10.2647	7.43072e-07	0.000373101	6.46673	ENSMUSG00000026520	Pycr2	-1
-1.19663	4.89644	-7.42918	1.57009e-05	0.00150838	3.48665	ENSMUSG00000028896	Rcc1	-1
-1.19571	4.10693	-5.81081	0.000133056	0.00423405	1.42054	ENSMUSG00000032939	Nup93	-1
-1.192	5.48031	-8.59545	4.07739e-06	0.000836048	4.80039	ENSMUSG00000035198	Tubg1	-1
-1.1852	10.6118	-6.2409	7.29373e-05	0.00316821	1.85044	ENSMUSG00000074445	Sprr2a3	-1
-1.18257	7.93269	-5.52514	0.000201182	0.00519518	0.797327	ENSMUSG00000000184	Ccnd2	-1
-1.17902	6.59405	-8.03194	7.68125e-06	0.00108789	4.15102	ENSMUSG00000007050	Lsm2	-1
-1.17789	2.75534	-3.58727	0.00448077	0.0305645	-1.86484	ENSMUSG00000041625	Ggact	-1
-1.17466	2.16833	-3.91471	0.00256368	0.0218892	-1.29725	ENSMUSG00000091639	Gm3756	-1
-1.17307	3.77325	-4.85508	0.000555209	0.00902658	0.0451273	ENSMUSG00000020899	Pfas	-1
-1.16667	3.72177	-4.03325	0.00210068	0.0194468	-1.25148	ENSMUSG00000020846	Rflnb	-1
-1.16617	6.42183	-8.35345	5.33064e-06	0.000892666	4.52086	ENSMUSG00000031683	Lsm6	-1
-1.1656	2.09983	-3.57732	0.0045582	0.0308324	-1.81928	ENSMUSG00000063296	Tmem117	-1
-1.16492	6.21836	-5.05956	0.000404551	0.00766582	0.136491	ENSMUSG00000028378	Ptgr1	-1
-1.16282	9.14927	-8.96236	2.74558e-06	0.000739583	5.17111	ENSMUSG00000004980	Hnrnpa2b1	-1
-1.15976	5.89764	-5.74894	0.000145378	0.00437186	1.20284	ENSMUSG00000089987	Gpx2-ps1	-1
-1.15881	3.81695	-5.23436	0.000310097	0.00674001	0.611077	ENSMUSG00000023345	Poc1a	-1
-1.15848	2.02123	-3.62314	0.00421263	0.0293971	-1.74343	ENSMUSG00000083287	Gm13502	-1
-1.15802	5.97593	-6.50561	5.10072e-05	0.0026644	2.26165	ENSMUSG00000075420	Smim6	-1
-1.1575	5.38816	-7.438	1.55329e-05	0.00150275	3.4835	ENSMUSG00000022856	Tmem41a	-1
-1.15737	4.61588	-5.91113	0.000115385	0.00391399	1.53008	ENSMUSG00000034192	Lsm3	-1
-1.15634	6.57682	-7.08055	2.41966e-05	0.00182645	2.99168	ENSMUSG00000078154	Gm12184	-1
-1.15616	8.54635	-9.4128	1.71868e-06	0.000591624	5.63804	ENSMUSG00000063412	Gm10131	-1
-1.15607	4.56417	-6.61522	4.41045e-05	0.00250109	2.48253	ENSMUSG00000058173	Smco4	-1
-1.15495	5.18943	-5.89143	0.000118647	0.00397441	1.45986	ENSMUSG00000029836	Cbx3	-1
-1.1505	2.01996	-3.62785	0.00417867	0.0292423	-1.73623	ENSMUSG00000022679	Mpv17l	-1
-1.14951	3.01625	-4.65539	0.000760666	0.0105798	-0.205188	ENSMUSG00000102252	Snrpn	-1
-1.14494	2.26936	-3.81672	0.00302621	0.0239344	-1.4566	ENSMUSG00000028068	Iqgap3	-1
-1.14475	5.19619	-8.21673	6.21838e-06	0.000965902	4.38905	ENSMUSG00000024590	Lmnb1	-1
-1.14178	3.92911	-5.50471	0.000207309	0.00533458	0.99691	ENSMUSG00000024556	Me2	-1
-1.13555	2.10133	-3.41855	0.0059993	0.0362916	-2.0722	ENSMUSG00000019970	Sgk1	-1
-1.1353	4.60343	-5.01641	0.000432286	0.0078821	0.212948	ENSMUSG00000049721	Gal3st1	-1
-1.13508	6.60856	-4.74986	0.000654945	0.00975893	-0.380789	ENSMUSG00000038372	Gmds	-1
-1.13232	2.64547	-3.88171	0.00271061	0.0226098	-1.38081	ENSMUSG00000044367	Slc16a13	-1
-1.13186	3.95285	-5.38512	0.00024741	0.00589068	0.822635	ENSMUSG00000021177	Tdp1	-1
-1.1295	3.30366	-3.55887	0.00470551	0.0314896	-1.9812	ENSMUSG00000026134	Prim2	-1
-1.12896	3.94376	-6.2378	7.32477e-05	0.00316821	2.00704	ENSMUSG00000004748	Mtfp1	-1
-1.12698	3.71039	-5.47694	0.000215962	0.00545384	0.969179	ENSMUSG00000016253	Nelfcd	-1
-1.12601	5.8947	-6.41324	5.77262e-05	0.00281825	2.1397	ENSMUSG00000105987	AI506816	-1
-1.12536	1.64685	-3.38965	0.00630836	0.0370677	-2.08614	ENSMUSG00000080870	Gm14111	-1
-1.12188	7.26763	-5.61887	0.000175438	0.00480114	0.946822	ENSMUSG00000044408	Sptssa	-1
-1.11655	4.91909	-6.92647	2.94298e-05	0.00204147	2.86728	ENSMUSG00000045132	Olfr620	-1
-1.11432	5.26878	-7.53625	1.37873e-05	0.0014193	3.60515	ENSMUSG00000021932	Rnaseh2b	-1
-1.11372	3.90323	-4.72657	0.000679481	0.0100051	-0.164763	ENSMUSG00000091337	Eid1	-1
-1.11327	7.3286	-8.07514	7.30875e-06	0.00104591	4.18924	ENSMUSG00000043445	Pgp	-1
-1.10669	3.42149	-3.98772	0.00226724	0.0202782	-1.29131	ENSMUSG00000023094	Msrb2	-1
-1.10119	4.60693	-6.05018	9.49235e-05	0.00365283	1.72384	ENSMUSG00000040767	Snrnp25	-1
-1.10042	5.15571	-4.49898	0.000977207	0.0121273	-0.664654	ENSMUSG00000030725	Lipt2	-1
-1.10013	4.08965	-5.27687	0.000290872	0.00651877	0.653308	ENSMUSG00000027377	Mall	-1
-1.09993	6.61516	-5.21127	0.000321103	0.00682866	0.348784	ENSMUSG00000072949	Acot1	-1
-1.09917	3.70508	-3.8729	0.00275132	0.0227149	-1.51396	ENSMUSG00000059791	Nrm	-1
-1.0983	3.64114	-4.98082	0.000456673	0.00807436	0.246115	ENSMUSG00000018362	Kpna2	-1
-1.09733	7.48856	-8.85413	3.08119e-06	0.000788453	5.0568	ENSMUSG00000043091	Tuba1c	-1
-1.09417	3.52457	-4.26971	0.0014193	0.0152928	-0.84762	ENSMUSG00000020330	Hmmr	-1
-1.09234	2.56762	-3.63375	0.00413652	0.0290084	-1.77234	ENSMUSG00000101330	Gm10193	-1
-1.09066	7.70839	-4.48873	0.000993499	0.01223	-0.840212	ENSMUSG00000105703	Gm43305	-1
-1.0899	2.68808	-4.23991	0.00149061	0.0157888	-0.821865	ENSMUSG00000019303	Psmc3ip	-1
-1.08919	3.2256	-4.19231	0.0016124	0.0165554	-0.939909	ENSMUSG00000021532	Fastkd3	-1
-1.08628	4.64511	-5.67899	0.000160794	0.00459373	1.19662	ENSMUSG00000011179	Odc1	-1
-1.08599	4.13039	-4.02038	0.00214643	0.0197164	-1.32627	ENSMUSG00000025001	Hells	-1
-1.08585	5.17124	-6.1032	8.81755e-05	0.00348512	1.75907	ENSMUSG00000003604	Aven	-1
-1.08408	3.40184	-4.13625	0.00176934	0.0174687	-1.04957	ENSMUSG00000024222	Fkbp5	-1
-1.08296	5.19081	-5.30033	0.000280806	0.00639754	0.590983	ENSMUSG00000002870	Mcm2	-1
-1.08291	7.17764	-8.48736	4.59258e-06	0.000879812	4.65875	ENSMUSG00000027593	Raly	-1
-1.08269	3.43412	-3.4487	0.00569341	0.0352325	-2.18491	ENSMUSG00000089804	Gm16136	-1
-1.08231	4.5097	-6.76162	3.64067e-05	0.00230487	2.67229	ENSMUSG00000022177	Haus4	-1
-1.08048	2.08327	-3.53023	0.00494399	0.0325095	-1.89365	ENSMUSG00000035455	Fignl1	-1
-1.07776	7.18866	-4.81095	0.000594926	0.00926654	-0.304859	ENSMUSG00000050092	Sprr2b	-1
-1.0776	5.48697	-7.87319	9.23672e-06	0.00117439	3.99549	ENSMUSG00000027430	Dtd1	-1
-1.07711	3.55223	-4.30589	0.00133749	0.0147704	-0.793144	ENSMUSG00000024665	Fads2	-1
-1.0711	4.65098	-5.45876	0.000221832	0.00556702	0.875773	ENSMUSG00000048779	P2ry6	-1
-1.0673	4.94514	-3.45049	0.00567573	0.0352325	-2.40504	ENSMUSG00000006800	Sulf2	-1
-1.06676	4.14105	-3.5243	0.00499495	0.0327388	-2.16487	ENSMUSG00000030711	Sult1a1	-1
-1.06464	9.98225	-7.05959	2.48455e-05	0.00184425	2.94664	ENSMUSG00000018770	Atp5g3	-1
-1.06398	3.86024	-5.14015	0.000357681	0.0072156	0.46753	ENSMUSG00000034427	Myo15b	-1
-1.06356	3.51357	-4.64749	0.000770295	0.0106149	-0.252803	ENSMUSG00000027634	Ndrg3	-1
-1.06011	8.73778	-6.56985	4.68319e-05	0.0025235	2.29291	ENSMUSG00000006356	Crip2	-1
-1.05673	7.44395	-5.17653	0.000338447	0.00698135	0.268425	ENSMUSG00000033685	Ucp2	-1
-1.05585	4.8259	-5.94495	0.000110008	0.00384938	1.56194	ENSMUSG00000022428	Cby1	-1
-1.05482	3.86774	-5.44116	0.00022768	0.00566642	0.908443	ENSMUSG00000018648	Dusp14	-1
-1.05077	6.32287	-6.9135	2.9923e-05	0.00205541	2.78488	ENSMUSG00000034424	Gcsh	-1
-1.0497	7.40761	-7.77287	1.03929e-05	0.00123085	3.83217	ENSMUSG00000005481	Ddx39	-1
-1.04862	3.51591	-5.10304	0.000378506	0.00740921	0.435611	ENSMUSG00000097421	D630011A20Rik	-1
-1.048	6.18237	-7.14187	2.24007e-05	0.00177885	3.08387	ENSMUSG00000023104	Rfc2	-1
-1.04766	1.89483	-3.17123	0.00923897	0.0472191	-2.44536	ENSMUSG00000034437	Gm9761	-1
-1.04717	6.45634	-8.33081	5.4676e-06	0.000894213	4.49451	ENSMUSG00000051989	Smim11	-1
-1.04566	5.06779	-6.74728	3.70928e-05	0.00231157	2.63077	ENSMUSG00000014633	Cmc2	-1
-1.04089	3.76847	-5.09936	0.000380636	0.00742781	0.413265	ENSMUSG00000032788	Pdxk	-1
-1.04027	4.71136	-6.19869	7.7284e-05	0.00322238	1.92101	ENSMUSG00000055760	Gemin6	-1
-1.03926	2.60491	-3.38809	0.00632549	0.0371366	-2.17544	ENSMUSG00000037544	Dlgap5	-1
-1.03815	2.30042	-3.52283	0.00500761	0.0327593	-1.9244	ENSMUSG00000006651	Aplp1	-1
-1.03576	8.16577	-8.75695	3.42054e-06	0.000810196	4.94997	ENSMUSG00000002984	Tomm40	-1
-1.03183	7.13035	-7.99812	7.98719e-06	0.00110363	4.10179	ENSMUSG00000026281	Dtymk	-1
-1.03166	6.52251	-8.36779	5.24581e-06	0.000889716	4.53466	ENSMUSG00000074088	Snrnp40	-1
-1.02553	2.7513	-4.12043	0.00181643	0.0176479	-1.01302	ENSMUSG00000045751	Mms22l	-1
-1.0252	4.41175	-4.80958	0.000596211	0.0092715	-0.0876085	ENSMUSG00000035439	Haus8	-1
-1.02468	4.95272	-4.01986	0.00214831	0.0197164	-1.43564	ENSMUSG00000026961	Lrrc26	-1
-1.02454	3.29729	-3.23807	0.00821811	0.0437749	-2.5183	ENSMUSG00000021714	Cenpk	-1
-1.02077	2.73135	-3.39626	0.00623625	0.0369346	-2.17687	ENSMUSG00000069910	Spdl1	-1
-1.0203	3.59755	-4.34052	0.00126381	0.0142314	-0.74402	ENSMUSG00000040703	Cyp2s1	-1
-1.02003	6.49714	-8.20032	6.33524e-06	0.000967039	4.34603	ENSMUSG00000073838	Tufm	-1
-1.01989	6.87004	-6.55087	4.80254e-05	0.00256211	2.28391	ENSMUSG00000026202	Tuba4a	-1
-1.01932	3.92596	-3.98912	0.00226192	0.0202782	-1.35204	ENSMUSG00000033032	Afap1l1	-1
-1.01857	5.56241	-5.21305	0.000320239	0.00682866	0.424169	ENSMUSG00000029394	Cdk2ap1	-1
-1.01678	4.56429	-4.65968	0.000755491	0.0105751	-0.341719	ENSMUSG00000024037	Wdr4	-1
-1.01553	5.75838	-5.79624	0.000135854	0.00423405	1.27958	ENSMUSG00000025534	Gusb	-1
-1.01363	3.14849	-3.45125	0.00566827	0.0352197	-2.14322	ENSMUSG00000044026	Slc35g1	-1
-1.0131	10.3487	-6.68163	4.04156e-05	0.0023676	2.45229	ENSMUSG00000042808	Gpx2	-1
-1.01245	3.95285	-3.442	0.00575998	0.0354211	-2.27705	ENSMUSG00000029154	Cwh43	-1
-1.01034	3.25232	-3.65571	0.00398349	0.0282964	-1.81623	ENSMUSG00000040084	Bub1b	-1
-1.01009	3.97367	-3.74408	0.00342454	0.0258071	-1.76616	ENSMUSG00000024764	Naa40	-1
-1.00865	8.97314	-5.06856	0.000399004	0.00762381	0.093977	ENSMUSG00000006360	Crip1	-1
-1.00793	5.15034	-3.89447	0.00265277	0.0222898	-1.67255	ENSMUSG00000021591	Glrx	-1
-1.00524	7.60782	-6.10894	8.74766e-05	0.00348512	1.65538	ENSMUSG00000090610	Gm3571	-1
-1.00511	6.25079	-7.2411	1.97915e-05	0.0016579	3.20607	ENSMUSG00000026201	Stk16	-1
-1.00461	6.29784	-3.48826	0.00531616	0.0338273	-2.48877	ENSMUSG00000057092	Fxyd3	-1
-1.00361	7.4999	-6.57298	4.66376e-05	0.0025235	2.30129	ENSMUSG00000057388	Mrpl18	-1
-1.00344	2.52829	-3.88816	0.00268121	0.0224327	-1.36261	ENSMUSG00000046994	Mars2	-1
-1.00336	7.14251	-6.4658	5.3794e-05	0.00271846	2.16113	ENSMUSG00000027342	Pcna	-1
-1.00288	10.9047	-6.45169	5.48202e-05	0.00274861	2.14524	ENSMUSG00000029580	Actb	-1
-1.00097	3.51409	-4.62629	0.000796753	0.0108053	-0.286345	ENSMUSG00000036672	Cenpt	-1
-0.997738	2.62245	-3.82805	0.00296858	0.0236834	-1.46578	ENSMUSG00000015337	Endog	-1
-0.997342	3.70761	-3.86157	0.00280459	0.0229205	-1.53459	ENSMUSG00000034159	2310007B03Rik	-1
-0.996702	8.27239	-5.69067	0.000158102	0.00458134	1.04369	ENSMUSG00000040681	Hmgn1	-1
-0.996554	2.94606	-4.13293	0.00177909	0.0174954	-1.00984	ENSMUSG00000025264	Tsr2	-1
-0.996276	4.80951	-5.12503	0.000366013	0.00728738	0.358474	ENSMUSG00000031877	Ces2g	-1
-0.995773	4.36118	-4.91123	0.000508679	0.00858505	0.0750658	ENSMUSG00000095026	Gm3336	-1
-0.995662	6.71442	-6.84625	3.2626e-05	0.00217581	2.6828	ENSMUSG00000032279	Idh3a	-1
-0.995426	8.26787	-5.71035	0.000153677	0.00450151	1.07287	ENSMUSG00000040048	Ndufb10	-1
-0.995125	5.79328	-6.07906	9.11819e-05	0.00357902	1.68172	ENSMUSG00000032398	Snapc5	-1
-0.992429	2.8935	-3.63612	0.00411976	0.0289204	-1.80367	ENSMUSG00000024056	Ndc80	-1
-0.990749	4.58439	-3.87403	0.00274606	0.0226851	-1.63262	ENSMUSG00000023277	Twf2	-1
-0.990312	7.9532	-7.0483	2.52026e-05	0.00184425	2.92685	ENSMUSG00000025134	Alyref	-1
-0.987798	2.97127	-3.49304	0.00527233	0.0336645	-2.04911	ENSMUSG00000020526	Znhit3	-1
-0.987171	5.59722	-4.59649	0.000835588	0.011152	-0.55387	ENSMUSG00000022210	Dhrs4	-1
-0.985244	2.29339	-3.15672	0.00947713	0.0481675	-2.5141	ENSMUSG00000069300	Hist1h2bj	-1
-0.984872	3.82041	-4.53942	0.000915625	0.0116579	-0.451721	ENSMUSG00000021975	Ints9	-1
-0.983176	2.95022	-3.39015	0.00630282	0.0370677	-2.21779	ENSMUSG00000008435	Rdh13	-1
-0.981817	3.89672	-5.35243	0.000259755	0.00606891	0.777586	ENSMUSG00000032180	Tmed1	-1
-0.979921	3.47883	-3.76851	0.00328488	0.0250728	-1.65978	ENSMUSG00000074364	Ehd2	-1
-0.977919	3.88909	-4.40733	0.00113347	0.0133319	-0.668123	ENSMUSG00000022540	Rogdi	-1
-0.975944	3.24206	-3.89281	0.00266025	0.0223117	-1.4259	ENSMUSG00000026388	3110009E18Rik	-1
-0.975797	4.6399	-6.08141	9.08842e-05	0.00357755	1.76411	ENSMUSG00000001844	Zdhhc4	-1
-0.975707	4.86008	-4.10237	0.00187184	0.0180079	-1.28677	ENSMUSG00000040212	Emp3	-1
-0.975056	2.39735	-3.50337	0.00517898	0.0333562	-1.9654	ENSMUSG00000006678	Pola1	-1
-0.973527	3.36352	-4.01942	0.00214989	0.0197164	-1.2343	ENSMUSG00000072476	Gm9008	-1
-0.97343	5.08877	-6.34797	6.30441e-05	0.00295597	2.09984	ENSMUSG00000021048	Mthfd1	-1
-0.97272	7.16636	-5.94965	0.000109282	0.00384938	1.43436	ENSMUSG00000059743	Fdps	-1
-0.972078	7.30961	-6.19699	7.7465e-05	0.00322238	1.78432	ENSMUSG00000059208	Hnrnpm	-1
-0.971362	6.59923	-8.09463	7.14712e-06	0.00104454	4.22281	ENSMUSG00000014551	Mrps25	-1
-0.970561	5.57234	-5.96121	0.000107518	0.00384572	1.52918	ENSMUSG00000053329	D10Jhu81e	-1
-0.970539	5.25757	-5.86527	0.000123131	0.0040237	1.41588	ENSMUSG00000038489	Polr2l	-1
-0.96903	4.62053	-4.36263	0.00121903	0.013898	-0.827284	ENSMUSG00000013539	Tango2	-1
-0.967799	5.43416	-5.21839	0.000317662	0.00679757	0.442736	ENSMUSG00000005469	Prkaca	-1
-0.966809	3.46843	-4.21266	0.0015591	0.0161897	-0.934913	ENSMUSG00000027883	Gpsm2	-1
-0.964264	3.13414	-4.1028	0.00187049	0.0180076	-1.07546	ENSMUSG00000027424	Mgme1	-1
-0.963496	2.22656	-3.24197	0.00816221	0.0436143	-2.36919	ENSMUSG00000022434	Fam118a	-1
-0.962257	5.67572	-5.60217	0.000179756	0.00489008	1.0005	ENSMUSG00000029482	Aacs	-1
-0.959289	2.57902	-3.5414	0.00484952	0.0321612	-1.92379	ENSMUSG00000020211	Sf3a2	-1
-0.95894	4.33328	-5.71784	0.000152028	0.00448081	1.27474	ENSMUSG00000109865	Hspa14	-1
-0.958411	5.27424	-4.68942	0.000720639	0.010327	-0.371202	ENSMUSG00000060675	Pla2g16	-1
-0.955962	7.92009	-4.83299	0.000574723	0.0091826	-0.281175	ENSMUSG00000041126	H2afv	-1
-0.954825	2.53829	-3.29716	0.00741162	0.0410899	-2.31798	ENSMUSG00000046993	Gm5637	-1
-0.954653	2.2178	-3.41094	0.00607911	0.0365172	-2.09679	ENSMUSG00000075609	Gm7935	-1
-0.952163	3.82473	-3.82686	0.0029746	0.0237174	-1.60847	ENSMUSG00000026921	Egfl7	-1
-0.951547	6.07501	-7.06096	2.48025e-05	0.00184425	2.98485	ENSMUSG00000018932	Map2k3	-1
-0.950967	3.57942	-4.28331	0.00138796	0.0150871	-0.83419	ENSMUSG00000040390	Map3k10	-1
-0.950372	3.88988	-4.86531	0.000546405	0.00894697	0.0489306	ENSMUSG00000039356	Exosc2	-1
-0.949142	5.84682	-5.1044	0.000377723	0.00740921	0.231844	ENSMUSG00000026355	Mcm6	-1
-0.948697	4.19902	-3.5698	0.00461768	0.0310817	-2.09378	ENSMUSG00000032245	Cln6	-1
-0.948581	2.42283	-3.52975	0.00494812	0.0325095	-1.92683	ENSMUSG00000044991	1110034G24Rik	-1
-0.947411	9.37902	-8.18322	6.45953e-06	0.000975176	4.31144	ENSMUSG00000031848	Lsm4	-1
-0.946069	5.51547	-5.88287	0.000120094	0.00397669	1.42158	ENSMUSG00000008305	Tle1	-1
-0.941757	7.61128	-7.60857	1.2638e-05	0.00135836	3.63183	ENSMUSG00000024181	Mrpl28	-1
-0.940819	3.11065	-3.22651	0.00838607	0.0443107	-2.51159	ENSMUSG00000027454	Gins1	-1
-0.940708	4.2164	-4.03708	0.00208729	0.019349	-1.31168	ENSMUSG00000026999	Nup35	-1
-0.939808	2.166	-3.44568	0.00572329	0.0352993	-2.03641	ENSMUSG00000048668	Rhno1	-1
-0.939192	2.67635	-3.75617	0.00335466	0.0253639	-1.58744	ENSMUSG00000045427	Hnrnph2	-1
-0.936484	8.20948	-6.74009	3.74421e-05	0.00231157	2.52154	ENSMUSG00000030126	Tmcc1	-1
-0.935252	5.7311	-5.73845	0.000147586	0.00439812	1.19603	ENSMUSG00000031349	Nsdhl	-1
-0.934782	3.11982	-3.44016	0.00577835	0.0355181	-2.15797	ENSMUSG00000039470	Zdhhc2	-1
-0.93293	4.87112	-5.03916	0.000417417	0.0077102	0.220769	ENSMUSG00000031171	Ftsj1	-1
-0.932071	4.29623	-5.22206	0.000315908	0.00679096	0.553833	ENSMUSG00000041840	Haus1	-1
-0.931079	4.62216	-5.59552	0.000181505	0.0049217	1.07719	ENSMUSG00000023147	Wrb	-1
-0.930135	6.48634	-4.9414	0.0004854	0.00834631	-0.0684756	ENSMUSG00000053931	Cnn3	-1
-0.92987	2.36201	-3.58206	0.00452119	0.0306726	-1.83661	ENSMUSG00000096726	Gm5558	-1
-0.927734	7.00383	-7.20511	2.06979e-05	0.00172332	3.13843	ENSMUSG00000115497	Gm49207	-1
-0.927093	5.93695	-5.39344	0.000244371	0.00585712	0.668367	ENSMUSG00000029472	Anapc5	-1
-0.926248	5.17596	-3.73781	0.00346144	0.0259712	-1.94408	ENSMUSG00000058254	Tspan7	-1
-0.926096	4.85703	-4.89518	0.000521547	0.0086933	-0.00156357	ENSMUSG00000033970	Rfc3	-1
-0.925519	3.70565	-3.96239	0.00236583	0.0207812	-1.36932	ENSMUSG00000048327	Ckap2l	-1
-0.922792	5.3629	-5.57025	0.000188323	0.00499463	0.978067	ENSMUSG00000038482	Tfdp1	-1
-0.922005	4.00937	-4.12332	0.00180774	0.0175883	-1.14439	ENSMUSG00000027010	Slc25a12	-1
-0.919532	6.8231	-6.24821	7.22117e-05	0.00316821	1.86807	ENSMUSG00000067367	Lyar	-1
-0.918597	10.0795	-7.3851	1.65703e-05	0.00153496	3.35962	ENSMUSG00000026701	Prdx6	-1
-0.916779	4.59707	-4.32113	0.00130453	0.0145141	-0.891748	ENSMUSG00000113999	Gm47681	-1
-0.915341	2.44909	-3.30245	0.00734349	0.0408772	-2.29739	ENSMUSG00000073889	Il11ra1	-1
-0.914184	5.84265	-5.68839	0.000158625	0.00458134	1.11498	ENSMUSG00000023942	Slc29a1	-1
-0.913631	6.27564	-4.64085	0.00077848	0.0106948	-0.538608	ENSMUSG00000031819	Emc8	-1
-0.913203	7.04004	-6.4654	5.3823e-05	0.00271846	2.16268	ENSMUSG00000024012	Mtch1	-1
-0.912557	8.27597	-3.90451	0.00260816	0.0220498	-1.82926	ENSMUSG00000026688	Mgst3	-1
-0.912174	4.61429	-4.14083	0.00175592	0.0173837	-1.1908	ENSMUSG00000016637	Ift27	-1
-0.911875	3.8281	-3.39616	0.00623732	0.0369346	-2.33444	ENSMUSG00000110331	Nudc-ps1	-1
-0.911002	4.94378	-5.66051	0.000165152	0.00465885	1.14539	ENSMUSG00000030316	Tamm41	-1
-0.910387	2.8901	-3.54442	0.00482432	0.0320924	-1.95567	ENSMUSG00000025933	Tmem14a	-1
-0.909548	5.81858	-4.98864	0.000451197	0.00802589	0.0515106	ENSMUSG00000028847	Trappc3	-1
-0.908404	4.41326	-4.9652	0.000467839	0.00817861	0.152178	ENSMUSG00000058809	Hspd1-ps3	-1
-0.908248	5.66094	-5.92617	0.00011296	0.00386199	1.47266	ENSMUSG00000028066	Pmf1	-1
-0.907517	4.39264	-3.32786	0.00702507	0.0397817	-2.5374	ENSMUSG00000026605	Cenpf	-1
-0.906631	4.82992	-4.6964	0.000712711	0.0102633	-0.312969	ENSMUSG00000027367	Stard7	-1
-0.905374	7.66664	-5.40936	0.000238663	0.00580311	0.623839	ENSMUSG00000071172	Srsf3	-1
-0.904591	4.46725	-4.32157	0.00130359	0.0145141	-0.875435	ENSMUSG00000038605	Samd10	-1
-0.903498	3.47892	-3.91006	0.00258386	0.0219524	-1.42729	ENSMUSG00000019853	Hebp2	-1
-0.903311	4.62011	-3.91392	0.0025671	0.021903	-1.57097	ENSMUSG00000031430	Vsig1	-1
-0.901809	7.72237	-5.79603	0.000135895	0.00423405	1.20189	ENSMUSG00000001729	Akt1	-1
-0.899934	5.32273	-5.39056	0.000245418	0.00585712	0.713393	ENSMUSG00000033589	Reep4	-1
-0.899432	3.30127	-3.53197	0.0049292	0.0324628	-2.03113	ENSMUSG00000023031	Cela1	-1
-0.897682	5.52025	-5.52772	0.000200422	0.00519518	0.901661	ENSMUSG00000075266	Cenpw	-1
-0.89739	6.01485	-6.59464	4.53194e-05	0.00250109	2.37715	ENSMUSG00000029388	Eif2b1	-1
-0.895674	7.57433	-7.77657	1.03476e-05	0.00123085	3.83499	ENSMUSG00000028044	Cks1b	-1
-0.895349	5.45616	-4.83702	0.000571112	0.00917654	-0.15464	ENSMUSG00000006715	Gmnn	-1
-0.893839	4.63386	-5.09084	0.000385627	0.00748269	0.323496	ENSMUSG00000006456	Rbm14	-1
-0.893506	2.48584	-3.49656	0.00524035	0.0335604	-1.98645	ENSMUSG00000027286	Lrrc57	-1
-0.893034	6.62302	-5.18066	0.000336333	0.00698135	0.300089	ENSMUSG00000025144	Cenpx	-1
-0.892463	3.41227	-3.59708	0.00440576	0.030248	-1.93731	ENSMUSG00000031657	Heatr3	-1
-0.891226	5.83223	-4.12403	0.00180561	0.0175812	-1.35929	ENSMUSG00000037221	Mospd3	-1
-0.890636	5.60161	-6.33002	6.45968e-05	0.00300824	2.04213	ENSMUSG00000033294	Noc4l	-1
-0.88806	4.74665	-5.48623	0.000213027	0.00540954	0.906879	ENSMUSG00000025925	Terf1	-1
-0.887371	7.22187	-7.04757	2.52261e-05	0.00184425	2.93292	ENSMUSG00000034880	Mrpl34	-1
-0.884602	3.62741	-4.52982	0.00092986	0.0117753	-0.448085	ENSMUSG00000002343	Armc6	-1
-0.883979	8.67381	-5.83193	0.000129108	0.00416358	1.25232	ENSMUSG00000050856	Atp5k	-1
-0.882832	3.22269	-3.91233	0.00257399	0.0219092	-1.39344	ENSMUSG00000084883	Ccdc85c	-1
-0.882342	7.88899	-6.2216	7.48915e-05	0.00318355	1.81229	ENSMUSG00000021263	Degs2	-1
-0.880363	7.47857	-5.72613	0.000150224	0.00446704	1.10186	ENSMUSG00000032381	Fam96a	-1
-0.878703	4.32347	-4.92834	0.000495336	0.00843238	0.104232	ENSMUSG00000022881	Rfc4	-1
-0.878433	2.27302	-3.18034	0.00909254	0.0467639	-2.47436	ENSMUSG00000021938	Pspc1	-1
-0.878135	6.29961	-5.3025	0.000279893	0.00638733	0.505104	ENSMUSG00000034875	Nudt19	-1
-0.877891	5.51716	-5.42823	0.000232078	0.00573434	0.753178	ENSMUSG00000033272	Slc35a4	-1
-0.87748	9.11672	-6.51315	5.04971e-05	0.00264782	2.21712	ENSMUSG00000006057	Atp5g1	-1
-0.87731	8.00263	-6.42207	5.7045e-05	0.0028089	2.09086	ENSMUSG00000037894	H2afz	-1
-0.876678	8.34505	-4.82958	0.000577806	0.0091826	-0.287998	ENSMUSG00000046804	Phgr1	-1
-0.874891	6.05446	-6.25101	7.19355e-05	0.00316747	1.90583	ENSMUSG00000000561	Wdr77	-1
-0.872038	3.28252	-3.8454	0.0028825	0.0233077	-1.51049	ENSMUSG00000055612	Cdca7	-1
-0.87061	4.09683	-3.28241	0.007605	0.0418412	-2.57102	ENSMUSG00000027001	Dusp19	-1
-0.869622	3.11656	-3.95778	0.00238426	0.0208896	-1.30803	ENSMUSG00000022442	Ttll1	-1
-0.868706	3.0221	-3.24737	0.00808545	0.0433559	-2.46511	ENSMUSG00000101567	Txn-ps1	-1
-0.868631	4.75613	-3.83983	0.00290983	0.0233673	-1.71486	ENSMUSG00000029387	Gtf2h3	-1
-0.864137	6.45445	-6.39972	5.87865e-05	0.00282381	2.09167	ENSMUSG00000026922	Agpat2	-1
-0.860148	6.73073	-5.79433	0.000136224	0.00423405	1.22145	ENSMUSG00000026278	Bok	-1
-0.857416	3.04091	-3.56928	0.0046218	0.0310942	-1.93439	ENSMUSG00000030735	Gm9755	-1
-0.856168	6.50617	-6.25726	7.13235e-05	0.00316078	1.89226	ENSMUSG00000028394	Pole3	-1
-0.855963	3.20487	-3.32281	0.00708723	0.0399718	-2.3666	ENSMUSG00000007589	Tinf2	-1
-0.855457	5.67909	-6.23885	7.31427e-05	0.00316821	1.91128	ENSMUSG00000026558	Uck2	-1
-0.85538	7.44191	-4.13445	0.00177462	0.0174687	-1.42931	ENSMUSG00000066551	Hmgb1	-1
-0.854982	4.11446	-4.34265	0.00125944	0.0142092	-0.79959	ENSMUSG00000004099	Dnmt1	-1
-0.85129	3.26909	-3.94061	0.00245415	0.0212848	-1.35316	ENSMUSG00000046731	Kctd11	-1
-0.851173	5.34253	-5.59503	0.000181635	0.0049217	1.01577	ENSMUSG00000027331	Knstrn	-1
-0.850978	6.29348	-6.97395	2.76981e-05	0.00195137	2.86356	ENSMUSG00000091478	Gm10039	-1
-0.850417	8.59684	-7.08672	2.4009e-05	0.00182614	2.97586	ENSMUSG00000043801	Oaz1-ps	-1
-0.849634	5.1665	-4.99568	0.000446318	0.00799416	0.122699	ENSMUSG00000020534	Shmt1	-1
-0.848361	3.94156	-3.79334	0.00314893	0.0244822	-1.68201	ENSMUSG00000027167	Elp4	-1
-0.847877	5.19841	-5.04275	0.000415125	0.00770675	0.192939	ENSMUSG00000058357	Gm6612	-1
-0.84756	7.4018	-7.47059	1.49289e-05	0.001485	3.46444	ENSMUSG00000042462	Dctpp1	-1
-0.8464	5.48234	-5.28604	0.000286891	0.00648242	0.540802	ENSMUSG00000027752	Exosc8	-1
-0.845172	4.56494	-5.02247	0.000428269	0.00785522	0.225023	ENSMUSG00000014980	Tsen15	-1
-0.843506	7.04294	-4.77077	0.000633705	0.00957964	-0.365844	ENSMUSG00000021252	Erg28	-1
-0.843466	6.05929	-5.76496	0.000142076	0.00436795	1.21205	ENSMUSG00000028565	Nfia	-1
-0.842356	6.73865	-6.34852	6.2997e-05	0.00295597	2.01031	ENSMUSG00000084224	Gm12337	-1
-0.841944	6.16715	-4.50873	0.000961974	0.0120142	-0.74728	ENSMUSG00000024258	Polr2d	-1
-0.841906	4.69039	-4.56471	0.000879198	0.0114426	-0.508361	ENSMUSG00000078134	Gm12355	-1
-0.841663	3.83844	-3.27183	0.00774694	0.0423508	-2.55088	ENSMUSG00000013629	Cad	-1
-0.839836	4.98583	-4.56446	0.000879561	0.0114426	-0.542724	ENSMUSG00000022476	Polr3h	-1
-0.838952	7.29261	-6.97719	2.75842e-05	0.00195137	2.84064	ENSMUSG00000022437	Samm50	-1
-0.838105	5.85565	-4.83854	0.000569758	0.00916873	-0.189206	ENSMUSG00000001999	Blvra	-1
-0.837456	5.02678	-4.12699	0.00179673	0.0175672	-1.26633	ENSMUSG00000003824	Syce2	-1
-0.836947	10.9173	-7.16827	2.16723e-05	0.00173606	3.09207	ENSMUSG00000078812	Eif5a	-1
-0.836736	3.67043	-4.31511	0.00131744	0.0146196	-0.793639	ENSMUSG00000002550	Uck1	-1
-0.836536	9.15319	-5.57472	0.000187099	0.00499099	0.873108	ENSMUSG00000029622	Arpc1b	-1
-0.836305	5.76068	-6.38361	6.00784e-05	0.00286582	2.10528	ENSMUSG00000021037	Ahsa1	-1
-0.835142	5.07144	-4.01863	0.00215275	0.0197295	-1.4538	ENSMUSG00000022774	Ncbp2	-1
-0.834186	9.16389	-6.30065	6.72262e-05	0.00307851	1.92407	ENSMUSG00000029430	Ran	-1
-0.834106	4.15703	-4.33944	0.00126606	0.014245	-0.809645	ENSMUSG00000022678	Nde1	-1
-0.834045	5.25386	-4.97294	0.000462273	0.0081315	0.0783697	ENSMUSG00000024525	Impa2	-1
-0.833358	7.32277	-6.86094	3.20138e-05	0.00215591	2.68818	ENSMUSG00000028792	Ak2	-1
-0.830997	4.81455	-4.43257	0.00108798	0.0130633	-0.736508	ENSMUSG00000096006	Gm21596	-1
-0.829537	6.16997	-5.21156	0.000320959	0.00682866	0.37294	ENSMUSG00000045294	Insig1	-1
-0.828837	2.70571	-3.16749	0.00929968	0.0474412	-2.55321	ENSMUSG00000082729	Gm14845	-1
-0.828782	3.57369	-3.29828	0.00739708	0.0410424	-2.46419	ENSMUSG00000039347	Atp6v0e2	-1
-0.828249	6.51027	-5.58906	0.000183224	0.00493962	0.927177	ENSMUSG00000025137	Pcyt2	-1
-0.828162	6.29283	-4.47014	0.00102378	0.0124908	-0.819822	ENSMUSG00000032014	Oaf	-1
-0.827756	2.89008	-3.34149	0.00686011	0.0392357	-2.29053	ENSMUSG00000081272	Gm13509	-1
-0.827455	5.7959	-5.57024	0.000188326	0.00499463	0.942678	ENSMUSG00000015176	Nolc1	-1
-0.825079	9.10974	-5.88281	0.000120105	0.00397669	1.32827	ENSMUSG00000037601	Nme1	-1
-0.824635	5.09676	-5.2565	0.000299919	0.00663491	0.53055	ENSMUSG00000021400	Wrnip1	-1
-0.824037	6.41991	-4.54697	0.000904588	0.0116034	-0.701694	ENSMUSG00000026175	Vil1	-1
-0.822759	6.18031	-6.42776	5.66098e-05	0.0028076	2.14257	ENSMUSG00000074797	Itpa	-1
-0.822202	7.66061	-6.59947	4.50313e-05	0.00250109	2.33532	ENSMUSG00000057762	Gm6169	-1
-0.821382	6.98757	-5.16325	0.000345338	0.00704748	0.258373	ENSMUSG00000000308	Ckmt1	-1
-0.82057	3.92807	-3.87159	0.00275745	0.022734	-1.55075	ENSMUSG00000023919	Cenpq	-1
-0.820509	4.94035	-4.64514	0.000773182	0.0106326	-0.407736	ENSMUSG00000042111	Ccdc115	-1
-0.819726	6.20553	-4.50756	0.00096379	0.0120259	-0.752088	ENSMUSG00000015994	Fnta	-1
-0.819423	5.76147	-4.93258	0.000492087	0.00839027	-0.0324145	ENSMUSG00000031371	Haus7	-1
-0.819391	6.60622	-5.9827	0.00010432	0.00379141	1.4994	ENSMUSG00000025499	Hras	-1
-0.81837	7.08495	-4.84522	0.00056383	0.00911282	-0.247454	ENSMUSG00000029538	Srsf9	-1
-0.817041	5.86889	-4.6369	0.00078339	0.0107211	-0.515073	ENSMUSG00000025153	Fasn	-1
-0.817001	5.41153	-5.10282	0.00037863	0.00740921	0.265351	ENSMUSG00000031776	Arl2bp	-1
-0.816781	10.1868	-6.29132	6.8086e-05	0.00309454	1.91731	ENSMUSG00000016319	Slc25a5	-1
-0.816078	4.53027	-4.29303	0.00136598	0.0149648	-0.93079	ENSMUSG00000022748	Cmss1	-1
-0.816022	6.08318	-5.15371	0.000350379	0.00709956	0.288937	ENSMUSG00000015806	Qdpr	-1
-0.816003	4.78922	-5.11347	0.000372527	0.00734258	0.342173	ENSMUSG00000067161	Gm5560	-1
-0.815229	3.65786	-3.83974	0.00291029	0.0233673	-1.56737	ENSMUSG00000034187	Nsf	-1
-0.814903	6.52598	-6.26372	7.06976e-05	0.00315752	1.90028	ENSMUSG00000037278	Tmem97	-1
-0.814768	3.83126	-3.57085	0.00460938	0.0310811	-2.04092	ENSMUSG00000027957	Slc35a3	-1
-0.814285	10.8891	-7.0472	2.52379e-05	0.00184425	2.9368	ENSMUSG00000018293	Pfn1	-1
-0.813803	5.35059	-5.27935	0.00028979	0.00650512	0.541824	ENSMUSG00000030056	Isy1	-1
-0.813546	5.67032	-5.48804	0.000212458	0.00540954	0.829493	ENSMUSG00000081999	Gm13461	-1
-0.811663	6.35113	-3.3394	0.0068851	0.0393132	-2.75444	ENSMUSG00000063275	Hacd1	-1
-0.807446	4.44295	-4.07361	0.00196371	0.0185924	-1.28167	ENSMUSG00000019761	Krt10	-1
-0.807347	5.68159	-5.8944	0.000118149	0.00397441	1.42461	ENSMUSG00000071041	Impdh2-ps	-1
-0.806666	6.32899	-4.52741	0.000933482	0.0117776	-0.728238	ENSMUSG00000064326	Siva1	-1
-0.806306	11.411	-5.68847	0.000158607	0.00458134	1.06281	ENSMUSG00000028367	Txn1	-1
-0.806174	3.47131	-3.44396	0.00574035	0.0353478	-2.20271	ENSMUSG00000028690	Mmachc	-1
-0.806079	4.66397	-4.18431	0.00163388	0.0167011	-1.12604	ENSMUSG00000026174	Cnot9	-1
-0.80591	5.0739	-5.56089	0.000190919	0.00504392	0.987924	ENSMUSG00000078695	Cisd3	-1
-0.805621	8.22837	-5.84416	0.000126881	0.00411105	1.26982	ENSMUSG00000062981	Mrpl42	-1
-0.805419	6.36228	-5.75993	0.000143103	0.00437186	1.18729	ENSMUSG00000045438	Cox19	-1
-0.805079	6.08261	-4.07075	0.00197312	0.0186686	-1.47203	ENSMUSG00000067006	Serpinb5	-1
-0.804689	6.09341	-5.15669	0.000348798	0.00707798	0.292969	ENSMUSG00000006058	Snf8	-1
-0.802779	4.60865	-4.5097	0.000960473	0.0120063	-0.58781	ENSMUSG00000029536	Gatc	-1
-0.802416	3.58374	-3.97495	0.0023164	0.0205573	-1.33526	ENSMUSG00000020553	Pctp	-1
-0.802106	7.12645	-6.58839	4.56961e-05	0.00250109	2.32802	ENSMUSG00000021361	Tmem14c	-1
-0.801598	4.70669	-5.10678	0.000376347	0.00739665	0.340256	ENSMUSG00000036639	Nudt1	-1
-0.800742	5.72694	-5.42043	0.000234775	0.00574926	0.723333	ENSMUSG00000029551	Psmg3	-1
-0.799684	10.5496	-5.59186	0.000182477	0.00493478	0.909319	ENSMUSG00000032231	Anxa2	-1
-0.797968	4.7964	-5.04107	0.000416196	0.0077102	0.230391	ENSMUSG00000062687	Cks1brt	-1
-0.797801	5.73828	-5.74397	0.00014642	0.00437412	1.20286	ENSMUSG00000027018	Hat1	-1
-0.797694	3.29065	-3.62013	0.00423451	0.0295148	-1.88366	ENSMUSG00000087569	Gm8464	-1
-0.797618	5.6857	-4.2538	0.0014569	0.0155758	-1.12866	ENSMUSG00000008373	Prpf31	-1
-0.797434	5.83664	-4.19949	0.00159338	0.0164445	-1.23351	ENSMUSG00000028194	Ddah1	-1
-0.797077	6.12363	-5.47932	0.000215206	0.00545211	0.783963	ENSMUSG00000006517	Mvd	-1
-0.797074	8.16426	-6.72471	3.82006e-05	0.00231934	2.5011	ENSMUSG00000004264	Phb2	-1
-0.79635	3.62199	-4.00266	0.00221113	0.0200311	-1.29426	ENSMUSG00000036167	Pphln1	-1
-0.796317	6.14059	-5.44533	0.000226279	0.00565205	0.731865	ENSMUSG00000068856	Sf3b4	-1
-0.795749	10.0597	-4.08753	0.00191868	0.0182935	-1.50613	ENSMUSG00000026385	Dbi	-1
-0.794502	4.5851	-3.61045	0.00430555	0.0298585	-2.08196	ENSMUSG00000086240	Gm7846	-1
-0.793159	4.16062	-4.31312	0.00132175	0.0146319	-0.853151	ENSMUSG00000021368	Tbc1d7	-1
-0.792572	5.75736	-5.22346	0.000315241	0.00679096	0.420779	ENSMUSG00000048087	Gm4737	-1
-0.791585	8.08615	-5.96786	0.000106519	0.00383192	1.44981	ENSMUSG00000018583	G3bp1	-1
-0.791266	6.92559	-5.64038	0.000170043	0.00472886	0.987158	ENSMUSG00000052833	Sae1	-1
-0.790843	5.38767	-5.34749	0.000261679	0.00610347	0.641577	ENSMUSG00000032897	Nfyc	-1
-0.79073	3.15426	-3.20154	0.00876092	0.0456245	-2.56221	ENSMUSG00000062906	Hdac10	-1
-0.789618	6.36292	-6.21228	7.58554e-05	0.00319663	1.83541	ENSMUSG00000089785	Slc25a5-ps	-1
-0.788594	6.26318	-6.02205	9.87253e-05	0.00375474	1.57154	ENSMUSG00000058672	Tubb2a	-1
-0.788404	6.51347	-4.24604	0.00147563	0.0156784	-1.20648	ENSMUSG00000037031	Tspan15	-1
-0.788082	5.66204	-5.63144	0.000172264	0.00476168	1.04314	ENSMUSG00000071657	Bscl2	-1
-0.787184	5.53567	-3.50016	0.00520779	0.0334401	-2.39686	ENSMUSG00000022571	Pycrl	-1
-0.78709	4.89926	-3.1839	0.00903606	0.0465488	-2.86203	ENSMUSG00000041220	Elovl6	-1
-0.785483	7.08	-5.92764	0.000112727	0.00386199	1.40435	ENSMUSG00000030335	Mrpl51	-1
-0.784851	6.0916	-4.1361	0.00176976	0.0174687	-1.36241	ENSMUSG00000021951	Eef1akmt1	-1
-0.784743	4.38187	-3.80891	0.00306667	0.0240952	-1.71766	ENSMUSG00000074093	Svip	-1
-0.784493	4.67801	-4.03526	0.00209365	0.0193949	-1.37595	ENSMUSG00000029246	Ppat	-1
-0.783883	3.87979	-3.73631	0.00347027	0.0259822	-1.77012	ENSMUSG00000062075	Lmnb2	-1
-0.783288	4.85503	-4.39966	0.00114769	0.0134051	-0.795751	ENSMUSG00000063018	2010204K13Rik	-1
-0.783157	6.43884	-6.16214	8.12723e-05	0.00331826	1.76161	ENSMUSG00000015889	Lta4h	-1
-0.782378	4.68843	-4.6635	0.000750923	0.0105482	-0.350661	ENSMUSG00000029326	Enoph1	-1
-0.780411	4.8684	-3.21406	0.00857081	0.0450099	-2.80505	ENSMUSG00000021377	Dek	-1
-0.779093	4.1749	-4.55445	0.000893793	0.0115159	-0.467175	ENSMUSG00000047446	Arl4a	-1
-0.77869	6.36427	-5.87356	0.000121689	0.00401518	1.35268	ENSMUSG00000062762	Ei24	-1
-0.776126	7.16338	-4.88768	0.000527669	0.00874442	-0.181738	ENSMUSG00000076437	Selenoh	-1
-0.775746	4.55781	-3.70237	0.00367753	0.0268448	-1.92176	ENSMUSG00000038644	Pold1	-1
-0.774598	4.07728	-3.6743	0.00385858	0.027609	-1.90232	ENSMUSG00000024660	Incenp	-1
-0.774134	4.09665	-3.9439	0.00244059	0.021238	-1.45303	ENSMUSG00000071102	Gm10313	-1
-0.773874	6.40128	-3.4334	0.00584649	0.0357769	-2.59371	ENSMUSG00000031347	Cetn2	-1
-0.773519	5.52545	-3.81491	0.00303556	0.023967	-1.85403	ENSMUSG00000020914	Top2a	-1
-0.773096	4.60192	-4.75329	0.000651404	0.00973774	-0.198578	ENSMUSG00000030513	Pcsk6	-1
-0.771358	5.12812	-5.53237	0.000199058	0.00518911	0.940888	ENSMUSG00000053801	Grwd1	-1
-0.771164	6.17621	-4.11075	0.00184591	0.0178334	-1.41197	ENSMUSG00000093930	Hmgcs1	-1
-0.767906	4.24245	-3.93368	0.00248296	0.0214265	-1.48957	ENSMUSG00000042148	Cox10	-1
-0.767653	8.91419	-6.61554	4.40856e-05	0.00250109	2.3554	ENSMUSG00000061904	Slc25a3	-1
-0.767546	5.93664	-5.66367	0.000164399	0.00465672	1.07091	ENSMUSG00000067713	Prkag1	-1
-0.767334	5.28294	-3.53475	0.0049056	0.0323383	-2.30668	ENSMUSG00000027968	Larp7	-1
-0.765772	5.47481	-4.49676	0.000980715	0.0121488	-0.706392	ENSMUSG00000028693	Nasp	-1
-0.763801	4.77495	-3.44527	0.00572734	0.0352993	-2.39268	ENSMUSG00000055978	Fut2	-1
-0.763646	9.23025	-6.90289	3.03331e-05	0.00207322	2.73904	ENSMUSG00000019179	Mdh2	-1
-0.763391	6.96974	-3.29889	0.00738925	0.0410176	-2.85962	ENSMUSG00000016921	Srsf6	-1
-0.762788	5.85512	-5.6773	0.000161188	0.00459373	1.09642	ENSMUSG00000014859	E2f4	-1
-0.762265	9.42018	-6.1036	8.81264e-05	0.00348512	1.64772	ENSMUSG00000035242	Oaz1	-1
-0.760743	4.52843	-3.70786	0.00364316	0.026736	-1.90843	ENSMUSG00000035772	Mrps2	-1
-0.759991	4.40305	-3.69909	0.00369819	0.0269098	-1.906	ENSMUSG00000032254	Kif23	-1
-0.759416	3.57607	-3.64588	0.00405124	0.0286739	-1.87932	ENSMUSG00000066042	Med18	-1
-0.758376	5.48788	-4.85737	0.00055322	0.00900491	-0.127303	ENSMUSG00000022814	Umps	-1
-0.757776	5.79567	-5.44223	0.000227317	0.00566642	0.750502	ENSMUSG00000098138	Gm9081	-1
-0.757583	6.04571	-4.71445	0.000692627	0.0101263	-0.403982	ENSMUSG00000044502	Bod1	-1
-0.757042	5.32008	-4.99798	0.000444736	0.00797952	0.110644	ENSMUSG00000049881	2810025M15Rik	-1
-0.75704	5.83883	-5.19548	0.000328867	0.00692672	0.371465	ENSMUSG00000042367	Gjb3	-1
-0.756275	7.34046	-5.72265	0.000150978	0.00447954	1.09888	ENSMUSG00000071497	Nutf2-ps1	-1
-0.755847	6.83948	-4.58536	0.000850599	0.0112361	-0.660029	ENSMUSG00000022769	Sdf2l1	-1
-0.755463	8.45914	-6.47457	5.31665e-05	0.00271524	2.16249	ENSMUSG00000062397	Zfp706	-1
-0.755089	5.39816	-4.33553	0.00127416	0.0142779	-0.963578	ENSMUSG00000009575	Cbx5	-1
-0.754664	3.82599	-3.92497	0.00251969	0.0216482	-1.44885	ENSMUSG00000021594	Srd5a1	-1
-0.753827	4.78388	-4.88774	0.000527624	0.00874442	-0.00677031	ENSMUSG00000031546	Gins4	-1
-0.753531	5.31016	-5.12212	0.000367641	0.00730918	0.304234	ENSMUSG00000022407	Adsl	-1
-0.753518	4.66555	-3.7875	0.00318037	0.024629	-1.79196	ENSMUSG00000031697	Orc6	-1
-0.753198	3.97878	-3.24452	0.00812581	0.0435044	-2.61849	ENSMUSG00000024286	Ccny	-1
-0.753035	7.43194	-4.89377	0.000522686	0.0086933	-0.177957	ENSMUSG00000030122	Ptms	-1
-0.753025	8.99056	-5.62779	0.000173178	0.00476778	0.951766	ENSMUSG00000022174	Dad1	-1
-0.752965	4.86952	-4.26173	0.00143804	0.0154584	-1.02416	ENSMUSG00000113753	Gm5791	-1
-0.75202	3.52299	-3.41283	0.00605917	0.0364452	-2.26295	ENSMUSG00000023940	Sgo1	-1
-0.751733	9.25517	-5.04461	0.000413937	0.00770552	0.0578202	ENSMUSG00000001525	Tubb5	-1
-0.751279	5.50766	-4.58655	0.000848979	0.0112321	-0.563439	ENSMUSG00000034120	Srsf2	-1
-0.750573	4.14045	-3.70677	0.00364995	0.0267564	-1.85639	ENSMUSG00000111997	Gm5176	-1
-0.750321	4.71099	-3.84687	0.00287532	0.0232633	-1.698	ENSMUSG00000032601	Prkar2a	-1
-0.74974	8.67858	-6.10627	8.78012e-05	0.00348512	1.64835	ENSMUSG00000020737	Jpt1	-1
-0.74967	5.6751	-4.25757	0.00144789	0.0155157	-1.12156	ENSMUSG00000025872	Thoc3	-1
-0.747736	3.04207	-3.18311	0.00904842	0.0465919	-2.57676	ENSMUSG00000032305	Fam219b	-1
-0.74543	8.88418	-5.9728	0.000105781	0.00382426	1.45773	ENSMUSG00000050608	Minos1	-1
-0.744938	4.8193	-4.94056	0.000486039	0.00834651	0.0719355	ENSMUSG00000047649	Cd3eap	-1
-0.744723	6.34525	-4.2596	0.00144307	0.0154863	-1.17359	ENSMUSG00000027952	Pmvk	-1
-0.744567	5.93108	-4.48651	0.000997075	0.0122521	-0.766107	ENSMUSG00000030611	Mrps11	-1
-0.744379	7.67279	-5.79831	0.000135452	0.00423405	1.20573	ENSMUSG00000018042	Cyb5r3	-1
-0.742548	8.18749	-6.01044	0.000100342	0.00375474	1.51094	ENSMUSG00000019804	Snx3	-1
-0.742326	3.52315	-3.31031	0.00724349	0.0404545	-2.43616	ENSMUSG00000070699	Sars2	-1
-0.741996	5.95342	-4.42798	0.00109611	0.0131171	-0.864458	ENSMUSG00000031838	Ifi30	-1
-0.741247	4.96541	-3.4215	0.00596859	0.0362126	-2.46052	ENSMUSG00000024579	Pcyox1l	-1
-0.739876	5.99037	-3.8361	0.00292833	0.023455	-1.8644	ENSMUSG00000032047	Acat1	-1
-0.739578	7.83417	-6.29323	6.79093e-05	0.00309454	1.91305	ENSMUSG00000041782	Lad1	-1
-0.739519	3.85054	-3.60653	0.0043347	0.0299548	-1.985	ENSMUSG00000031934	Panx1	-1
-0.737698	3.49267	-3.30708	0.00728436	0.0406466	-2.4378	ENSMUSG00000029610	Aimp2	-1
-0.737585	3.35479	-3.23787	0.00822093	0.0437749	-2.53254	ENSMUSG00000087213	2810408I11Rik	-1
-0.73752	5.62506	-5.054	0.000408017	0.00766954	0.169434	ENSMUSG00000028669	Pithd1	-1
-0.735375	5.84249	-3.89308	0.00265901	0.0223117	-1.75405	ENSMUSG00000026617	Bpnt1	-1
-0.734383	4.57644	-4.31322	0.00132153	0.0146319	-0.903853	ENSMUSG00000027384	Ndufaf5	-1
-0.733634	6.35317	-5.26035	0.000298185	0.0066072	0.436692	ENSMUSG00000026810	Dpm2	-1
-0.732931	5.7278	-5.17431	0.000339591	0.00698802	0.347266	ENSMUSG00000031403	Dkc1	-1
-0.732449	4.17245	-3.1645	0.00934874	0.047656	-2.78529	ENSMUSG00000025158	Rfng	-1
-0.73213	4.25898	-4.18054	0.0016441	0.0167806	-1.08244	ENSMUSG00000038000	Acd	-1
-0.731055	7.35352	-5.07236	0.000396693	0.00760079	0.10663	ENSMUSG00000013822	Elof1	-1
-0.730849	4.16195	-3.5072	0.00514481	0.0332609	-2.19796	ENSMUSG00000027165	B230118H07Rik	-1
-0.729681	5.03252	-3.93084	0.00249488	0.0214888	-1.59823	ENSMUSG00000038009	Dnajc22	-1
-0.728597	4.45323	-3.39473	0.00625281	0.0369944	-2.43349	ENSMUSG00000022682	Rrn3	-1
-0.728517	3.79331	-3.55596	0.00472921	0.0316242	-2.06142	ENSMUSG00000030729	Pgm2l1	-1
-0.728349	4.75478	-3.86084	0.00280807	0.0229344	-1.67985	ENSMUSG00000081932	Gm12331	-1
-0.726755	6.71374	-4.68446	0.000726337	0.0103834	-0.493002	ENSMUSG00000097703	Gm26623	-1
-0.726288	8.87473	-3.35553	0.00669428	0.0385764	-2.78116	ENSMUSG00000003873	Bax	-1
-0.724625	7.89843	-4.59745	0.00083431	0.011152	-0.663289	ENSMUSG00000059040	Eno1b	-1
-0.724196	5.74135	-4.90871	0.000510675	0.00858777	-0.0690489	ENSMUSG00000038005	Hpf1	-1
-0.724188	5.36402	-4.38069	0.00118367	0.013642	-0.885646	ENSMUSG00000048170	Mcmbp	-1
-0.723265	4.72482	-4.53735	0.000918681	0.0116751	-0.557173	ENSMUSG00000029625	Cpsf4	-1
-0.723119	8.48998	-6.40412	5.84398e-05	0.00282381	2.06561	ENSMUSG00000030357	Fkbp4	-1
-0.72306	7.46529	-6.21868	7.51919e-05	0.00318355	1.8122	ENSMUSG00000031924	Cyb5b	-1
-0.722473	8.93142	-5.9249	0.000113162	0.00386199	1.38865	ENSMUSG00000027133	Nop10	-1
-0.72227	6.59346	-4.76374	0.000640765	0.00964209	-0.358964	ENSMUSG00000020483	Dynll2	-1
-0.721317	6.88552	-5.177	0.000338206	0.00698135	0.283147	ENSMUSG00000040385	Ppp1ca	-1
-0.721097	4.18445	-3.52301	0.00500608	0.0327593	-2.17475	ENSMUSG00000027597	Ahcy	-1
-0.720885	9.23617	-6.05544	9.42304e-05	0.00364658	1.578	ENSMUSG00000025428	Atp5a1	-1
-0.720884	5.21083	-5.05418	0.000407902	0.00766954	0.208584	ENSMUSG00000030423	Pop4	-1
-0.720716	7.77974	-4.47717	0.00101222	0.0123828	-0.860284	ENSMUSG00000006442	Srm	-1
-0.720387	5.41728	-4.78823	0.000616537	0.00944141	-0.230479	ENSMUSG00000035704	Alg8	-1
-0.72028	5.83699	-3.64511	0.00405664	0.0286825	-2.17905	ENSMUSG00000027247	Arhgap1	-1
-0.7197	7.07201	-3.94113	0.002452	0.0212795	-1.74909	ENSMUSG00000028603	Scp2	-1
-0.718798	4.68262	-4.55802	0.000888687	0.0115159	-0.519049	ENSMUSG00000031864	Ints10	-1
-0.718233	8.92469	-5.42162	0.000234362	0.00574926	0.640585	ENSMUSG00000006589	Aprt	-1
-0.717856	5.71864	-5.62382	0.000174182	0.00478583	1.0272	ENSMUSG00000025487	Psmd13	-1
-0.717256	6.98947	-5.91137	0.000115346	0.00391399	1.3832	ENSMUSG00000062867	Impdh2	-1
-0.717179	5.61175	-4.25018	0.00146561	0.0156073	-1.12813	ENSMUSG00000004864	Mapk13	-1
-0.717057	4.24265	-3.45437	0.00563766	0.0351394	-2.30036	ENSMUSG00000048175	Asb8	-1
-0.716975	5.50766	-5.17869	0.000337342	0.00698135	0.372948	ENSMUSG00000039771	Polr2j	-1
-0.716006	6.35602	-4.69959	0.000709117	0.0102438	-0.449494	ENSMUSG00000007415	Gatad1	-1
-0.715161	5.90153	-5.06337	0.000402195	0.00764709	0.161025	ENSMUSG00000022391	Rangap1	-1
-0.714751	9.59434	-4.86912	0.000543167	0.00893067	-0.218816	ENSMUSG00000005732	Ranbp1	-1
-0.713611	6.10444	-5.40204	0.000241268	0.00583546	0.668084	ENSMUSG00000109324	Prmt1	-1
-0.713489	10.1593	-6.22731	7.43073e-05	0.00317029	1.82749	ENSMUSG00000028639	Ybx1	-1
-0.712662	3.91327	-3.20603	0.00869233	0.0454569	-2.67435	ENSMUSG00000026856	Dolpp1	-1
-0.71234	8.4475	-4.81763	0.00058873	0.00922232	-0.307074	ENSMUSG00000030431	Tmem238	-1
-0.712292	7.2031	-5.3145	0.000274909	0.00631741	0.486406	ENSMUSG00000063524	Eno1	-1
-0.710786	6.73641	-4.49232	0.000987757	0.0121921	-0.808503	ENSMUSG00000031167	Rbm3	-1
-0.710672	5.70025	-4.83831	0.000569955	0.00916873	-0.177392	ENSMUSG00000096199	Ptrhd1	-1
-0.709594	7.68578	-3.45697	0.00561229	0.035094	-2.60132	ENSMUSG00000056209	Npm3	-1
-0.70921	4.71457	-3.72057	0.00356482	0.0264107	-1.91322	ENSMUSG00000001497	Pax9	-1
-0.709119	4.02636	-3.58324	0.00451197	0.0306726	-2.0492	ENSMUSG00000032498	Mlh1	-1
-0.708597	5.60519	-3.61279	0.00428828	0.0297838	-2.21165	ENSMUSG00000036678	Aaas	-1
-0.708412	3.40119	-3.19715	0.00882856	0.0457859	-2.60893	ENSMUSG00000042797	Aqp11	-1
-0.708369	4.19782	-3.1581	0.00945424	0.0480867	-2.80117	ENSMUSG00000067547	Gm7666	-1
-0.708235	5.20659	-4.54111	0.00091315	0.0116545	-0.6058	ENSMUSG00000021115	Vrk1	-1
-0.706587	6.60454	-3.72952	0.00351077	0.0261721	-2.09234	ENSMUSG00000022351	Sqle	-1
-0.70627	4.19981	-3.97264	0.0023254	0.0205767	-1.41922	ENSMUSG00000110371	Gm9619	-1
-0.705538	4.21099	-3.81757	0.00302188	0.0239245	-1.6798	ENSMUSG00000028614	Ndc1	-1
-0.705238	5.55922	-5.28377	0.000287871	0.00648322	0.529232	ENSMUSG00000073131	Vma21	-1
-0.704789	5.43995	-3.95321	0.00240264	0.0209842	-1.60935	ENSMUSG00000024187	Fam234a	-1
-0.704623	3.92605	-3.37	0.00652771	0.0379508	-2.39658	ENSMUSG00000002803	Btbd6	-1
-0.704557	5.95406	-4.83452	0.00057335	0.0091826	-0.204577	ENSMUSG00000039515	Ptpa	-1
-0.704105	7.21571	-6.16102	8.13985e-05	0.00331826	1.73509	ENSMUSG00000020402	Vdac1	-1
-0.701226	5.87262	-4.42554	0.00110045	0.0131232	-0.861736	ENSMUSG00000020929	Eftud2	-1
-0.700255	5.56833	-4.06881	0.0019795	0.0187098	-1.42786	ENSMUSG00000020895	Tmem107	-1
-0.699944	6.07946	-4.0071	0.00219474	0.0199909	-1.58064	ENSMUSG00000042312	S100a13	-1
-0.699732	6.80311	-4.97136	0.0004634	0.00814091	-0.0366027	ENSMUSG00000028010	Gar1	-1
-0.699189	7.68054	-5.88991	0.000118903	0.00397441	1.33949	ENSMUSG00000054766	Set	-1
-0.698368	3.93925	-3.81782	0.00302058	0.0239245	-1.64269	ENSMUSG00000027774	Gfm1	-1
-0.69832	5.01055	-3.75854	0.00334113	0.0253174	-1.88777	ENSMUSG00000028096	Gpr89	-1
-0.697206	6.17508	-4.39573	0.00115506	0.0134476	-0.935277	ENSMUSG00000036850	Mrpl41	-1
-0.696817	7.06667	-5.68947	0.000158378	0.00458134	1.05589	ENSMUSG00000004268	Emg1	-1
-0.696768	8.22596	-5.04976	0.000410677	0.00766954	0.0628195	ENSMUSG00000054312	Mrps21	-1
-0.696297	3.47566	-3.61736	0.00425467	0.0295953	-1.91392	ENSMUSG00000090114	Gm3076	-1
-0.696196	9.05045	-4.95896	0.000472375	0.00824586	-0.0789363	ENSMUSG00000027404	Snrpb	-1
-0.694096	6.87196	-5.3438	0.000263124	0.00612677	0.541098	ENSMUSG00000042962	Gm5436	-1
-0.693178	6.74266	-4.95632	0.000474312	0.00826741	-0.0579536	ENSMUSG00000061479	Snrpa	-1
-0.691546	8.18993	-4.43105	0.00109067	0.0130633	-0.939078	ENSMUSG00000116620	AC140300.2	-1
-0.691501	7.20033	-3.73142	0.00349938	0.0261275	-2.11411	ENSMUSG00000076432	Ywhaq	-1
-0.691373	6.28986	-3.29745	0.00740793	0.041086	-2.82322	ENSMUSG00000019961	Tmpo	-1
-0.691166	4.28443	-3.32029	0.00711833	0.0400457	-2.53586	ENSMUSG00000053436	Mapk14	-1
-0.691024	6.48364	-5.24371	0.000305753	0.00671842	0.403968	ENSMUSG00000029621	Arpc1a	-1
-0.690804	8.14317	-5.55865	0.000191543	0.00504756	0.846805	ENSMUSG00000026895	Ndufa8	-1
-0.690295	6.23448	-5.01436	0.000433654	0.00789077	0.0607236	ENSMUSG00000028398	Dmac1	-1
-0.689917	5.42028	-4.075	0.00195919	0.0185751	-1.40132	ENSMUSG00000046694	Fam46b	-1
-0.689315	4.10271	-3.65249	0.00400557	0.0284238	-1.9437	ENSMUSG00000022248	Rad1	-1
-0.688704	6.10585	-4.80359	0.000601842	0.00931093	-0.26533	ENSMUSG00000036114	Rpp25l	-1
-0.688645	5.6559	-4.7201	0.000686465	0.0100794	-0.363036	ENSMUSG00000024800	Rpp30	-1
-0.688617	3.21996	-3.13563	0.00983452	0.0493991	-2.68445	ENSMUSG00000034919	Ttc22	-1
-0.687834	6.15689	-5.17392	0.000339787	0.00698802	0.314891	ENSMUSG00000061024	Rrs1	-1
-0.687691	8.20897	-4.42111	0.0011084	0.0131952	-0.955621	ENSMUSG00000017781	Pitpna	-1
-0.687402	6.15675	-3.83581	0.00292974	0.023455	-1.87907	ENSMUSG00000018379	Srsf1	-1
-0.687218	6.69003	-3.36344	0.00660265	0.0381925	-2.73368	ENSMUSG00000035105	Egln3	-1
-0.686704	4.04999	-3.4733	0.00545565	0.0343964	-2.24026	ENSMUSG00000004558	Ndrg2	-1
-0.685954	5.50792	-3.93726	0.00246802	0.0213552	-1.64444	ENSMUSG00000037364	Srrt	-1
-0.68528	7.48907	-6.04208	9.60021e-05	0.00366946	1.56129	ENSMUSG00000021607	Mrpl36	-1
-0.685108	5.03347	-3.75757	0.0033467	0.0253456	-1.89247	ENSMUSG00000038055	Dexi	-1
-0.684499	5.16101	-4.52047	0.000943959	0.0118538	-0.634537	ENSMUSG00000019809	Pex3	-1
-0.683815	5.32719	-4.67422	0.000738245	0.0104347	-0.40406	ENSMUSG00000030826	Bcat2	-1
-0.683001	5.88103	-3.66127	0.0039457	0.028057	-2.15586	ENSMUSG00000013698	Pea15a	-1
-0.682811	5.8224	-4.37392	0.0011968	0.0137128	-0.942783	ENSMUSG00000028899	Taf12	-1
-0.682363	4.95554	-3.9029	0.00261527	0.0220963	-1.63556	ENSMUSG00000026687	Aldh9a1	-1
-0.681869	8.12886	-4.8333	0.000574447	0.0091826	-0.281596	ENSMUSG00000033938	Ndufb7	-1
-0.68105	8.82265	-4.71247	0.000694798	0.0101289	-0.475995	ENSMUSG00000036309	Skp1a	-1
-0.67874	6.95624	-5.58714	0.000183735	0.00493964	0.906701	ENSMUSG00000022186	Oxct1	-1
-0.678112	5.85618	-5.28053	0.000289275	0.0065042	0.500084	ENSMUSG00000021124	Vti1b	-1
-0.677948	6.6926	-4.32102	0.00130477	0.0145141	-1.0907	ENSMUSG00000025792	Slc25a10	-1
-0.677361	4.74374	-3.30627	0.00729471	0.0406716	-2.62811	ENSMUSG00000080875	Gm7332	-1
-0.677218	10.1116	-5.75105	0.000144939	0.00437186	1.14178	ENSMUSG00000003072	Atp5d	-1
-0.677195	4.36473	-3.41975	0.00598675	0.0362477	-2.37756	ENSMUSG00000026767	Mindy3	-1
-0.676394	4.34998	-3.77096	0.0032712	0.0250361	-1.77772	ENSMUSG00000065979	Cpped1	-1
-0.676392	6.00827	-5.11937	0.000369188	0.00731877	0.240132	ENSMUSG00000003235	Eif2b5	-1
-0.67611	10.7195	-5.55777	0.000191791	0.00504756	0.859921	ENSMUSG00000026238	Ptma	-1
-0.676103	6.48399	-5.3818	0.000248637	0.00589944	0.615665	ENSMUSG00000020733	Slc9a3r1	-1
-0.675765	7.30235	-5.16729	0.000343226	0.00702408	0.256314	ENSMUSG00000035585	Tsen34	-1
-0.675526	5.0607	-4.50061	0.000974638	0.0121134	-0.655368	ENSMUSG00000037013	Ss18	-1
-0.675121	8.74796	-5.6502	0.000167637	0.00469968	0.984302	ENSMUSG00000022551	Cyc1	-1
-0.674842	8.52208	-4.72438	0.000681835	0.010029	-0.457584	ENSMUSG00000022452	Smdt1	-1
-0.674751	6.68378	-4.62944	0.000792759	0.0107724	-0.58118	ENSMUSG00000049299	Trappc1	-1
-0.674529	6.72938	-4.77419	0.000630307	0.00957871	-0.348622	ENSMUSG00000017221	Psmd3	-1
-0.674463	6.33947	-5.1891	0.000332059	0.00694342	0.327271	ENSMUSG00000035199	Arl6ip5	-1
-0.674133	4.03017	-3.72701	0.00352585	0.0262171	-1.80744	ENSMUSG00000106326	Gm42977	-1
-0.673794	7.68882	-4.16326	0.00169182	0.0169775	-1.38443	ENSMUSG00000029066	Mrpl20	-1
-0.672668	7.17624	-5.8626	0.000123599	0.0040237	1.30762	ENSMUSG00000000088	Cox5a	-1
-0.67109	5.42186	-4.39834	0.00115015	0.0134133	-0.862985	ENSMUSG00000026275	Ppp1r7	-1
-0.669222	7.27703	-5.26136	0.000297734	0.0066072	0.402853	ENSMUSG00000042079	Hnrnpf	-1
-0.668902	4.6191	-4.11801	0.00182375	0.017671	-1.23148	ENSMUSG00000026939	Tmem141	-1
-0.668895	5.74332	-4.12621	0.00179907	0.0175672	-1.34917	ENSMUSG00000073775	Kti12	-1
-0.668411	4.51224	-3.79041	0.00316462	0.0245592	-1.76693	ENSMUSG00000067608	Pcna-ps2	-1
-0.668308	4.75341	-3.15439	0.00951598	0.0482935	-2.89199	ENSMUSG00000025436	Atp23	-1
-0.668198	6.6069	-3.71451	0.00360193	0.0265391	-2.11844	ENSMUSG00000083713	Gm5883	-1
-0.668008	3.80592	-3.63912	0.00409855	0.0288332	-1.92417	ENSMUSG00000023262	Acy1	-1
-0.667816	7.229	-5.04552	0.00041336	0.00770522	0.0670983	ENSMUSG00000021810	Ecd	-1
-0.667461	6.15657	-4.38784	0.00116998	0.0135296	-0.947141	ENSMUSG00000067071	Hes6	-1
-0.667436	8.09524	-4.77818	0.00062636	0.00955042	-0.370272	ENSMUSG00000006728	Cdk4	-1
-0.667419	4.3369	-3.26314	0.00786548	0.0426773	-2.64279	ENSMUSG00000022900	Ildr1	-1
-0.667403	6.16751	-4.88253	0.00053192	0.00879364	-0.143675	ENSMUSG00000048007	Timm8a1	-1
-0.666624	7.64388	-5.00117	0.000442555	0.0079683	-0.0102239	ENSMUSG00000008035	Mid1ip1	-1
-0.666619	9.20132	-5.05639	0.00040652	0.00766954	0.0760828	ENSMUSG00000030189	Ybx3	-1
-0.665991	4.49459	-4.12916	0.00179027	0.0175176	-1.197	ENSMUSG00000026662	Sephs1	-1
-0.665877	6.28422	-4.67488	0.000737462	0.0104347	-0.485172	ENSMUSG00000016495	Plgrkt	-1
-0.664787	6.28728	-4.58175	0.000855528	0.0112649	-0.636926	ENSMUSG00000062203	Gspt1	-1
-0.663721	6.42639	-5.43119	0.000231064	0.00571957	0.69357	ENSMUSG00000020869	Lrrc59	-1
-0.663701	4.46801	-3.96757	0.00234529	0.0206614	-1.46287	ENSMUSG00000017721	Pigt	-1
-0.663616	3.79799	-3.57424	0.00458251	0.0309511	-2.03206	ENSMUSG00000032058	Ppp2r1b	-1
-0.663342	6.81598	-5.75269	0.000144598	0.00437186	1.15694	ENSMUSG00000033543	Gtf2a2	-1
-0.663312	4.77387	-3.58658	0.00448614	0.0305859	-2.15008	ENSMUSG00000020069	Hnrnph3	-1
-0.661701	6.40288	-3.73687	0.00346694	0.0259822	-2.06742	ENSMUSG00000060467	Gm10080	-1
-0.659744	5.01676	-4.20224	0.00158616	0.016421	-1.14086	ENSMUSG00000030934	Oat	-1
-0.659136	7.12524	-5.71652	0.000152317	0.00448081	1.09443	ENSMUSG00000018326	Ywhab	-1
-0.658937	7.70763	-5.00831	0.000437713	0.00792718	0.000347067	ENSMUSG00000048277	Syngr2	-1
-0.658574	6.07161	-4.07567	0.001957	0.0185672	-1.46363	ENSMUSG00000000171	Sdhd	-1
-0.658269	3.87806	-3.37389	0.00648367	0.0377523	-2.3834	ENSMUSG00000034738	Nostrin	-1
-0.658253	5.70191	-4.77138	0.000633102	0.00957964	-0.284775	ENSMUSG00000020843	Timm22	-1
-0.657912	5.10026	-3.23792	0.00822026	0.0437749	-2.79752	ENSMUSG00000022557	Bop1	-1
-0.657713	6.47527	-4.58325	0.000853476	0.0112525	-0.645857	ENSMUSG00000014077	Chp1	-1
-0.657574	4.8889	-3.70634	0.00365264	0.0267564	-1.96103	ENSMUSG00000074238	Ap1ar	-1
-0.657212	5.77577	-3.62365	0.00420894	0.0293963	-2.21072	ENSMUSG00000058709	Egln2	-1
-0.657037	6.10868	-4.54546	0.000906789	0.0116148	-0.683806	ENSMUSG00000008690	Ncaph2	-1
-0.656477	4.45371	-3.98141	0.00229141	0.0204452	-1.4378	ENSMUSG00000071454	Dtnb	-1
-0.655621	5.99577	-3.77882	0.00322771	0.0248695	-1.96397	ENSMUSG00000034659	Tmem109	-1
-0.655581	7.12208	-4.82417	0.000582725	0.0091826	-0.282389	ENSMUSG00000027160	Ccdc34	-1
-0.655499	6.45601	-3.40451	0.00614741	0.0366869	-2.64814	ENSMUSG00000000385	Tmprss2	-1
-0.655309	6.58035	-3.63647	0.00411727	0.0289177	-2.25214	ENSMUSG00000058492	Scp2-ps2	-1
-0.654673	5.33911	-4.06138	0.00200422	0.0188459	-1.41552	ENSMUSG00000042709	Atpaf2	-1
-0.654136	7.5669	-5.22431	0.000314837	0.00679096	0.340485	ENSMUSG00000066979	Bub3	-1
-0.653702	7.05496	-4.24997	0.00146613	0.0156073	-1.22448	ENSMUSG00000022148	Fyb	-1
-0.653528	7.69902	-3.86981	0.00276573	0.0227518	-1.88518	ENSMUSG00000087701	Gm13493	-1
-0.653503	4.00309	-3.39201	0.00628247	0.0370582	-2.37171	ENSMUSG00000036285	Noa1	-1
-0.653419	8.25491	-4.94202	0.000484935	0.00834631	-0.107901	ENSMUSG00000056612	Ppp1r14b	-1
-0.65326	7.12141	-4.13106	0.00178463	0.0174986	-1.42719	ENSMUSG00000022841	Ap2m1	-1
-0.652385	10.151	-4.00166	0.00221483	0.0200311	-1.65146	ENSMUSG00000071866	Ppia	-1
-0.652051	6.70845	-4.59864	0.000832721	0.0111504	-0.632658	ENSMUSG00000007564	Ppp2r1a	-1
-0.651006	7.13445	-3.82292	0.00299455	0.0238211	-1.95414	ENSMUSG00000021737	Psmd6	-1
-0.65061	5.61483	-4.2417	0.00148621	0.0157542	-1.14303	ENSMUSG00000046034	Otulin	-1
-0.650289	6.19747	-3.28182	0.00761292	0.041868	-2.84365	ENSMUSG00000073599	Ecscr	-1
-0.650105	5.74091	-4.30334	0.00134309	0.0148093	-1.05275	ENSMUSG00000041958	Pigs	-1
-0.649365	7.65531	-4.78768	0.000617068	0.00944141	-0.351559	ENSMUSG00000022285	Ywhaz	-1
-0.64924	4.9035	-3.43901	0.00578987	0.0355379	-2.42193	ENSMUSG00000020441	2310033P09Rik	-1
-0.64794	7.975	-5.08281	0.000390397	0.0075327	0.11573	ENSMUSG00000055302	Mrfap1	-1
-0.647882	3.48892	-3.14865	0.00961225	0.0486204	-2.7052	ENSMUSG00000078919	Dpm1	-1
-0.647702	4.35435	-3.76801	0.00328767	0.0250783	-1.78331	ENSMUSG00000031358	Msl3	-1
-0.646516	8.96766	-5.08952	0.000386409	0.00748729	0.126996	ENSMUSG00000022956	Atp5o	-1
-0.646284	6.16416	-4.17078	0.00167087	0.0168907	-1.3103	ENSMUSG00000000568	Hnrnpd	-1
-0.646212	4.73417	-4.09665	0.00188975	0.0180925	-1.28162	ENSMUSG00000043346	Gm6741	-1
-0.645951	5.96181	-3.72642	0.0035294	0.0262233	-2.05133	ENSMUSG00000036880	Acaa2	-1
-0.645591	3.88973	-3.1338	0.00986606	0.0494852	-2.79414	ENSMUSG00000047719	Ubiad1	-1
-0.645439	8.13888	-5.27351	0.000292342	0.0065304	0.412296	ENSMUSG00000021102	Glrx5	-1
-0.644147	4.79428	-4.17606	0.00165633	0.016831	-1.15699	ENSMUSG00000040263	Klhdc4	-1
-0.643706	6.95944	-5.24566	0.000304857	0.00671333	0.387107	ENSMUSG00000021486	Prelid1	-1
-0.642752	5.99782	-4.04961	0.00204402	0.0190787	-1.50221	ENSMUSG00000039197	Adk	-1
-0.642515	3.4983	-3.17862	0.00912003	0.0468203	-2.65572	ENSMUSG00000030353	Tead4	-1
-0.641905	7.38777	-5.49248	0.000211074	0.00538984	0.753969	ENSMUSG00000024067	Dpy30	-1
-0.641216	7.01801	-4.73458	0.000670927	0.00995377	-0.423657	ENSMUSG00000021537	Cetn3	-1
-0.641032	4.36859	-3.40698	0.00612112	0.0366081	-2.40039	ENSMUSG00000078370	Gm6316	-1
-0.640853	6.12668	-5.17814	0.000337621	0.00698135	0.323298	ENSMUSG00000068184	Ndufaf2	-1
-0.640129	4.89954	-3.22776	0.00836768	0.0442305	-2.78662	ENSMUSG00000090737	Gm6788	-1
-0.638444	7.1763	-3.81024	0.00305972	0.0240747	-1.97721	ENSMUSG00000019370	Calm3	-1
-0.637915	8.75832	-4.37537	0.00119397	0.0136996	-1.03094	ENSMUSG00000021290	2010107E04Rik	-1
-0.637607	4.3479	-3.59898	0.00439136	0.0302247	-2.06927	ENSMUSG00000021631	Mrps36-ps1	-1
-0.637574	7.90766	-4.96685	0.000466644	0.00817698	-0.0670824	ENSMUSG00000027364	Usp50	-1
-0.637537	4.99846	-4.0968	0.00188928	0.0180925	-1.31463	ENSMUSG00000022721	Trmt2a	-1
-0.636041	6.71334	-3.51788	0.00505061	0.0329111	-2.46551	ENSMUSG00000020736	Nt5c	-1
-0.635703	5.60667	-4.43717	0.00107989	0.0129908	-0.818548	ENSMUSG00000064181	Rab3ip	-1
-0.634894	5.34759	-3.24912	0.00806076	0.0432742	-2.81158	ENSMUSG00000001436	Slc19a1	-1
-0.63447	7.14105	-4.7068	0.000701069	0.0101596	-0.472421	ENSMUSG00000037710	Cisd1	-1
-0.634386	5.15337	-3.53487	0.00490454	0.0323383	-2.29093	ENSMUSG00000035351	Nup37	-1
-0.634065	4.81324	-4.03208	0.00210482	0.0194589	-1.39964	ENSMUSG00000041353	Tmem29	-1
-0.633533	4.87226	-3.7759	0.00324378	0.0249308	-1.84036	ENSMUSG00000097989	Gm4335	-1
-0.633365	7.22588	-5.06544	0.000400917	0.00763911	0.0985618	ENSMUSG00000002477	Snrpd1	-1
-0.632703	7.45163	-5.21851	0.000317606	0.00679757	0.333244	ENSMUSG00000056076	Eif3b	-1
-0.632419	5.08555	-3.35367	0.00671601	0.0386692	-2.59511	ENSMUSG00000031775	Pllp	-1
-0.632214	4.90418	-3.69404	0.00373033	0.0270434	-1.9841	ENSMUSG00000063236	1110038F14Rik	-1
-0.632111	8.77902	-4.5685	0.000873876	0.0114119	-0.711257	ENSMUSG00000020163	Uqcr11	-1
-0.631644	6.10286	-4.10922	0.00185063	0.0178539	-1.40951	ENSMUSG00000030802	Bckdk	-1
-0.630984	8.29169	-5.20122	0.000326018	0.00689051	0.300017	ENSMUSG00000020547	Bzw2	-1
-0.63098	5.98481	-4.3511	0.00124217	0.0141217	-0.995047	ENSMUSG00000025786	Zdhhc3	-1
-0.630491	7.29437	-4.57676	0.000862388	0.0113049	-0.688481	ENSMUSG00000027679	Dnajc19	-1
-0.630136	5.1126	-3.6468	0.00404488	0.0286436	-2.09282	ENSMUSG00000031245	Hmgn5	-1
-0.629944	6.64793	-4.94735	0.000480949	0.00833891	-0.0679215	ENSMUSG00000025869	Nop16	-1
-0.62934	5.23183	-3.40283	0.00616539	0.0367622	-2.52945	ENSMUSG00000039887	Alg14	-1
-0.629338	7.04284	-4.82289	0.000583888	0.0091826	-0.282013	ENSMUSG00000021905	Dph3	-1
-0.628747	7.21014	-4.78109	0.000623501	0.0095174	-0.35405	ENSMUSG00000045160	Bola3	-1
-0.628196	6.58718	-4.76298	0.000641536	0.00964269	-0.359966	ENSMUSG00000046756	Mrps7	-1
-0.628114	6.31227	-5.24706	0.000304214	0.00671333	0.418335	ENSMUSG00000000902	Smarcb1	-1
-0.6279	6.33842	-4.22262	0.0015337	0.0160349	-1.2354	ENSMUSG00000004044	Cavin1	-1
-0.626726	9.52198	-4.50284	0.000971144	0.0121016	-0.815072	ENSMUSG00000036751	Cox6b1	-1
-0.626516	5.59763	-3.63974	0.0040942	0.0288294	-2.16486	ENSMUSG00000028910	Mecr	-1
-0.626345	7.16265	-5.31775	0.000273572	0.00631741	0.492458	ENSMUSG00000039128	Cdc123	-1
-0.626197	7.33236	-4.63917	0.00078057	0.0107021	-0.587192	ENSMUSG00000038845	Phb	-1
-0.625422	4.14559	-3.67087	0.00388132	0.0277112	-1.91877	ENSMUSG00000080994	Gm13464	-1
-0.624887	7.90849	-5.39134	0.000245134	0.00585712	0.594351	ENSMUSG00000047547	Cltb	-1
-0.624784	4.03611	-3.45445	0.00563689	0.0351394	-2.27026	ENSMUSG00000018659	Pnpo	-1
-0.624671	8.06454	-5.01862	0.000430813	0.00787036	0.0141342	ENSMUSG00000032966	Fkbp1a	-1
-0.624506	5.92908	-4.27229	0.00141328	0.0152519	-1.12159	ENSMUSG00000068141	Gm10232	-1
-0.623947	6.08285	-4.4183	0.00111345	0.0132209	-0.891312	ENSMUSG00000025371	Chmp6	-1
-0.623331	7.93143	-3.9532	0.00240268	0.0209842	-1.74427	ENSMUSG00000035413	Tmem98	-1
-0.623244	5.86901	-4.35192	0.00124051	0.0141194	-0.983802	ENSMUSG00000049235	Gm7324	-1
-0.622792	5.20985	-4.02625	0.00212545	0.0195838	-1.45942	ENSMUSG00000022792	Yars2	-1
-0.622221	6.57963	-3.93456	0.00247928	0.0214081	-1.73841	ENSMUSG00000020392	Cdkn2aipnl	-1
-0.622149	7.00305	-4.63353	0.000787613	0.0107344	-0.587421	ENSMUSG00000024925	Rnaseh2c	-1
-0.62205	5.14872	-3.31465	0.00718874	0.0402933	-2.67137	ENSMUSG00000056820	Tsnax	-1
-0.622046	8.36405	-3.19228	0.00890426	0.0460568	-3.06853	ENSMUSG00000009013	Dynll1	-1
-0.621476	5.61549	-4.75155	0.000653198	0.00975394	-0.308997	ENSMUSG00000021079	Timm9	-1
-0.621184	5.00649	-3.87648	0.00273472	0.0226851	-1.68696	ENSMUSG00000039244	E130309D02Rik	-1
-0.620129	6.29527	-3.70069	0.00368809	0.0268656	-2.12264	ENSMUSG00000027984	Hadh	-1
-0.619984	6.67735	-4.52293	0.000940237	0.0118287	-0.755359	ENSMUSG00000000399	Ndufa9	-1
-0.619979	4.92613	-3.55884	0.00470579	0.0314896	-2.21903	ENSMUSG00000029687	Ezh2	-1
-0.619855	8.7534	-5.39196	0.000244907	0.00585712	0.59476	ENSMUSG00000025132	Arhgdia	-1
-0.619276	6.56303	-4.84769	0.000561659	0.00911282	-0.2227	ENSMUSG00000019139	Isyna1	-1
-0.619268	7.68667	-5.13599	0.000359956	0.00725084	0.201479	ENSMUSG00000028851	Nudc	-1
-0.619106	8.36796	-4.98639	0.000452763	0.00802589	-0.0374248	ENSMUSG00000054452	Aes	-1
-0.618922	7.25344	-5.05257	0.000408913	0.00766954	0.0776309	ENSMUSG00000003299	Mrpl4	-1
-0.618538	5.60177	-3.9136	0.00256848	0.021903	-1.69543	ENSMUSG00000062908	Acadm	-1
-0.618053	4.17507	-3.24839	0.00807102	0.0433006	-2.64334	ENSMUSG00000047379	B4gat1	-1
-0.617881	5.16379	-3.39399	0.00626091	0.0370034	-2.53577	ENSMUSG00000045752	Tssc4	-1
-0.617507	8.8288	-3.75715	0.00334905	0.0253494	-2.08187	ENSMUSG00000062933	Gm10123	-1
-0.617236	4.0777	-3.54054	0.00485674	0.0321862	-2.13019	ENSMUSG00000084093	Gm16418	-1
-0.617179	6.19855	-4.9188	0.000502733	0.00853714	-0.0882115	ENSMUSG00000025135	Anapc11	-1
-0.61707	4.34123	-3.37984	0.00641692	0.0374835	-2.4432	ENSMUSG00000101188	Eif4a-ps4	-1
-0.616642	6.02527	-3.66159	0.00394354	0.028057	-2.16907	ENSMUSG00000026127	Imp4	-1
-0.616506	5.71313	-4.33729	0.00127051	0.0142708	-0.994354	ENSMUSG00000032526	Ss18l2	-1
-0.616496	4.23326	-3.5174	0.00505482	0.0329114	-2.19217	ENSMUSG00000002846	Timmdc1	-1
-0.615942	6.25914	-4.78905	0.000615747	0.00944141	-0.299338	ENSMUSG00000029036	Atad3a	-1
-0.615762	6.61349	-4.34974	0.00124495	0.0141348	-1.03885	ENSMUSG00000001552	Jup	-1
-0.615538	6.89692	-4.71422	0.000692877	0.0101263	-0.452354	ENSMUSG00000003868	Ruvbl2	-1
-0.614883	4.46024	-3.40792	0.00611113	0.0366081	-2.41239	ENSMUSG00000017801	Mlx	-1
-0.613516	6.34515	-4.55489	0.00089316	0.0115159	-0.684565	ENSMUSG00000029404	Arl6ip4	-1
-0.612215	6.72766	-4.82516	0.00058182	0.0091826	-0.266565	ENSMUSG00000029513	Prkab1	-1
-0.612148	5.10988	-4.14447	0.00174534	0.0173066	-1.24873	ENSMUSG00000019849	Prep	-1
-0.612027	5.01399	-3.93715	0.00246848	0.0213552	-1.58522	ENSMUSG00000031527	Eri1	-1
-0.611111	6.18908	-4.86724	0.000544759	0.00893067	-0.169627	ENSMUSG00000091625	Lsm5	-1
-0.610919	6.18679	-4.4135	0.00112218	0.0132482	-0.90687	ENSMUSG00000022677	Fopnl	-1
-0.610783	7.40713	-4.45596	0.00104754	0.0127177	-0.890014	ENSMUSG00000022503	Nubp1	-1
-0.609448	5.56321	-4.63613	0.000784353	0.0107218	-0.489869	ENSMUSG00000008384	Sertad1	-1
-0.608545	6.46491	-4.79497	0.000610045	0.00939289	-0.302028	ENSMUSG00000005378	Bud23	-1
-0.60746	10.2281	-3.43509	0.00582944	0.0357043	-2.63072	ENSMUSG00000063229	Ldha	-1
-0.606929	8.14156	-3.52811	0.00496219	0.0325863	-2.48065	ENSMUSG00000084817	Gm5526	-1
-0.605496	5.30247	-4.23253	0.00150884	0.0158821	-1.12486	ENSMUSG00000029535	Triap1	-1
-0.605464	6.45456	-4.11589	0.0018302	0.017694	-1.42262	ENSMUSG00000078440	Dohh	-1
-0.604852	7.32123	-5.19776	0.000327733	0.00691613	0.303427	ENSMUSG00000061360	Phf5a	-1
-0.604819	7.85903	-3.73833	0.00345832	0.0259712	-2.11365	ENSMUSG00000035048	Anapc13	-1
-0.604574	5.31908	-3.21713	0.00852486	0.0448715	-2.86364	ENSMUSG00000018923	Med11	-1
-0.60438	7.21553	-5.22608	0.000313996	0.00679096	0.349698	ENSMUSG00000025580	Eif4a3	-1
-0.603969	8.91895	-5.35778	0.000257693	0.00603099	0.543076	ENSMUSG00000001056	Nhp2	-1
-0.603428	8.13646	-4.31549	0.00131662	0.0146196	-1.13148	ENSMUSG00000022427	Tomm22	-1
-0.603094	6.74117	-3.92909	0.00250226	0.0215254	-1.75615	ENSMUSG00000039640	Mrpl12	-1
-0.602784	4.87787	-3.45423	0.00563905	0.0351394	-2.39234	ENSMUSG00000057134	Ado	-1
-0.602228	5.66563	-3.89583	0.0026467	0.0222796	-1.73252	ENSMUSG00000032126	Hmbs	-1
-0.60205	5.20468	-3.81302	0.00304533	0.0240303	-1.82032	ENSMUSG00000021072	Tmx1	-1
-0.601686	5.37759	-4.15418	0.00171746	0.0171181	-1.26408	ENSMUSG00000085521	4930526A20Rik	-1
-0.601484	5.17013	-3.71551	0.00359579	0.026519	-1.98288	ENSMUSG00000041632	Mrps27	-1
-0.600113	7.44009	-5.0002	0.000443219	0.00796982	-0.00874327	ENSMUSG00000061613	U2af1	-1
-0.599758	8.54767	-5.23933	0.000307779	0.00671842	0.359398	ENSMUSG00000025651	Uqcrc1	-1
-0.599737	4.22915	-3.42669	0.00591509	0.0360522	-2.34653	ENSMUSG00000025742	Prps2	-1
-0.599621	5.46373	-3.95626	0.00239033	0.0209295	-1.60777	ENSMUSG00000026860	Sh3glb2	-1
-0.599263	5.35698	-3.90683	0.002598	0.0220027	-1.67918	ENSMUSG00000007338	Mrpl49	-1
-0.597936	7.58221	-4.22289	0.00153302	0.0160349	-1.28228	ENSMUSG00000028786	Tmem54	-1
-0.597872	4.83609	-3.34791	0.00678378	0.0389777	-2.57001	ENSMUSG00000087679	Tmem250-ps	-1
-0.597179	5.8117	-4.41616	0.00111734	0.0132328	-0.8727	ENSMUSG00000020840	Blmh	-1
-0.596015	7.38801	-4.822	0.000584702	0.0091826	-0.292134	ENSMUSG00000034345	Gtf2h5	-1
-0.595536	5.48541	-3.69618	0.00371665	0.0269585	-2.05459	ENSMUSG00000017176	Nt5c3b	-1
-0.595505	4.59758	-3.79407	0.003145	0.0244793	-1.77266	ENSMUSG00000028953	Abcf2	-1
-0.595264	6.92905	-4.86767	0.000544395	0.00893067	-0.206417	ENSMUSG00000035754	Wdr18	-1
-0.594782	8.21206	-5.0854	0.000388853	0.00751344	0.119029	ENSMUSG00000005354	Txn2	-1
-0.594676	5.0898	-3.21977	0.00848562	0.0447678	-2.82775	ENSMUSG00000021868	Ppif	-1
-0.593407	8.19268	-5.11384	0.000372317	0.00734258	0.163721	ENSMUSG00000063931	Pepd	-1
-0.592886	7.6002	-5.11976	0.000368968	0.00731877	0.177161	ENSMUSG00000003528	Slc25a1	-1
-0.592444	6.9455	-3.34454	0.00682369	0.0390863	-2.77879	ENSMUSG00000108772	Gm6063	-1
-0.591912	7.15803	-4.68021	0.000731249	0.0104103	-0.516028	ENSMUSG00000045948	Mrps12	-1
-0.591389	7.42495	-4.58917	0.000845425	0.0112	-0.670815	ENSMUSG00000031388	Naa10	-1
-0.591218	5.8559	-4.45316	0.00105229	0.0127594	-0.815644	ENSMUSG00000036932	Aifm1	-1
-0.590779	7.27554	-4.65677	0.000758995	0.0105751	-0.5572	ENSMUSG00000007721	Ccdc124	-1
-0.590452	5.5251	-3.66886	0.00389467	0.0277804	-2.10624	ENSMUSG00000031023	Akip1	-1
-0.589	8.02733	-4.44643	0.00106382	0.012865	-0.912861	ENSMUSG00000047040	Prr15l	-1
-0.588685	4.26736	-3.27486	0.00770604	0.0422112	-2.61208	ENSMUSG00000019373	Cops3	-1
-0.588305	5.30104	-3.9207	0.00253788	0.021723	-1.64902	ENSMUSG00000055531	Cpsf6	-1
-0.588022	3.88393	-3.21166	0.00860691	0.0451649	-2.66112	ENSMUSG00000029402	Snrnp35	-1
-0.587496	6.41328	-3.97343	0.00232231	0.0205767	-1.66214	ENSMUSG00000071014	Ndufb6	-1
-0.587157	7.62836	-4.94138	0.00048542	0.00834631	-0.104878	ENSMUSG00000008036	Ap2s1	-1
-0.587056	6.08488	-4.24927	0.0014678	0.0156073	-1.17277	ENSMUSG00000071632	2510002D24Rik	-1
-0.585519	5.60516	-3.96735	0.00234618	0.0206614	-1.60482	ENSMUSG00000024732	Ccdc86	-1
-0.584416	6.51389	-4.00744	0.00219346	0.0199909	-1.6102	ENSMUSG00000040025	Ythdf2	-1
-0.584253	3.9053	-3.26203	0.00788075	0.0427253	-2.57852	ENSMUSG00000047989	Ino80c	-1
-0.584114	8.85439	-3.32927	0.00700772	0.0397584	-2.82711	ENSMUSG00000032330	Cox7a2	-1
-0.583193	6.28129	-3.1346	0.00985234	0.0494513	-3.10747	ENSMUSG00000019806	Aig1	-1
-0.582902	7.05252	-4.8246	0.000582328	0.0091826	-0.27954	ENSMUSG00000028049	Scamp3	-1
-0.581804	8.04121	-4.23213	0.00150983	0.0158821	-1.27104	ENSMUSG00000025980	Hspd1	-1
-0.581665	6.28069	-4.2799	0.00139574	0.0151339	-1.13573	ENSMUSG00000015289	Lage3	-1
-0.581166	7.13179	-4.34277	0.00125919	0.0142092	-1.07147	ENSMUSG00000030079	Ruvbl1	-1
-0.58115	5.20523	-3.78645	0.00318606	0.0246453	-1.86594	ENSMUSG00000026248	Mrpl44	-1
-0.580856	4.62607	-3.84455	0.00288663	0.0233274	-1.69104	ENSMUSG00000022614	Lmf2	-1
-0.580821	7.04569	-4.79108	0.00061378	0.0094319	-0.333245	ENSMUSG00000026032	Ndufb3	-1
-0.580642	7.28254	-4.59867	0.000832679	0.0111504	-0.652256	ENSMUSG00000061032	Rrp1	-1
-0.580333	7.35513	-4.82522	0.000581761	0.0091826	-0.286249	ENSMUSG00000032171	Pin1	-1
-0.580192	4.5141	-3.13978	0.00976304	0.0491299	-2.88176	ENSMUSG00000043782	Bicdl2	-1
-0.579965	6.12678	-3.52616	0.00497891	0.0326493	-2.41235	ENSMUSG00000044986	Tst	-1
-0.57936	6.37212	-3.99799	0.00222852	0.0200924	-1.61756	ENSMUSG00000100153	Gm5601	-1
-0.579119	6.11556	-4.1991	0.00159441	0.0164445	-1.25924	ENSMUSG00000061650	Med9	-1
-0.579082	4.8532	-3.59594	0.0044144	0.0302771	-2.14536	ENSMUSG00000024785	Rcl1	-1
-0.57842	6.92297	-5.01593	0.000432604	0.0078821	0.0294563	ENSMUSG00000037916	Ndufv1	-1
-0.578257	7.40053	-3.83169	0.00295029	0.023592	-1.94585	ENSMUSG00000106918	Mrpl33	-1
-0.578189	7.13288	-4.87129	0.00054133	0.00891701	-0.207082	ENSMUSG00000003309	Ap1m2	-1
-0.578174	5.14358	-3.44818	0.00569855	0.0352325	-2.43962	ENSMUSG00000023156	Rpp14	-1
-0.578073	4.93334	-3.41219	0.00606587	0.0364696	-2.47283	ENSMUSG00000115662	Gm7232	-1
-0.577551	4.02935	-3.12807	0.00996597	0.0498045	-2.8269	ENSMUSG00000107333	Gm43008	-1
-0.576986	5.40996	-3.95221	0.00240667	0.021003	-1.60856	ENSMUSG00000040771	Oard1	-1
-0.576745	6.94803	-4.55547	0.000892339	0.0115159	-0.713241	ENSMUSG00000061474	Mrps36	-1
-0.576244	5.92269	-3.96016	0.00237472	0.0208459	-1.64775	ENSMUSG00000038618	Rassf7	-1
-0.575651	8.07273	-3.87538	0.0027398	0.0226851	-1.87857	ENSMUSG00000020321	Mdh1	-1
-0.574432	5.49041	-3.60782	0.00432503	0.0299332	-2.20803	ENSMUSG00000045455	Gm9797	-1
-0.573047	6.72268	-3.68057	0.00381734	0.0274529	-2.18334	ENSMUSG00000024959	Bad	-1
-0.573037	5.00034	-3.81635	0.00302815	0.023936	-1.78851	ENSMUSG00000032306	Mpi	-1
-0.569871	6.67361	-3.75003	0.00338998	0.0255887	-2.06065	ENSMUSG00000078713	Tomm5	-1
-0.569374	6.56833	-4.02991	0.00211246	0.0195165	-1.5751	ENSMUSG00000003346	Abhd17a	-1
-0.569329	8.5815	-4.93446	0.000490656	0.00839027	-0.119619	ENSMUSG00000030120	Mlf2	-1
-0.569289	7.1214	-4.62727	0.000795505	0.0107991	-0.601283	ENSMUSG00000019432	Ddx39b	-1
-0.568946	4.73838	-3.60012	0.00438274	0.0302234	-2.12236	ENSMUSG00000021608	Lpcat1	-1
-0.568526	5.97755	-4.22701	0.00152262	0.01598	-1.20158	ENSMUSG00000001211	Agpat3	-1
-0.56851	6.50512	-4.67115	0.000741854	0.0104536	-0.504241	ENSMUSG00000030127	Cops7a	-1
-0.568408	6.01977	-3.36929	0.00653585	0.0379809	-2.67635	ENSMUSG00000022913	Psmg1	-1
-0.568011	7.14404	-4.33553	0.00127418	0.0142779	-1.08389	ENSMUSG00000037373	Ctbp1	-1
-0.567946	5.45174	-3.89499	0.00265047	0.0222841	-1.71069	ENSMUSG00000091512	Lamtor3	-1
-0.566438	5.80163	-3.72992	0.00350838	0.0261721	-2.03095	ENSMUSG00000004929	Thop1	-1
-0.565909	7.09998	-4.15389	0.00171829	0.0171181	-1.3878	ENSMUSG00000063694	Cycs	-1
-0.565713	5.58413	-3.53751	0.00488222	0.0322825	-2.34012	ENSMUSG00000026926	Pmpca	-1
-0.565241	6.54122	-3.98967	0.00225984	0.0202782	-1.6421	ENSMUSG00000022698	Naa50	-1
-0.564829	6.47093	-3.95836	0.00238192	0.0208825	-1.69137	ENSMUSG00000024902	Mrpl11	-1
-0.564591	6.15922	-4.05383	0.00202966	0.0189834	-1.50787	ENSMUSG00000007815	Rhoa	-1
-0.564457	6.66867	-4.54018	0.000914512	0.0116545	-0.72655	ENSMUSG00000077450	Rab11b	-1
-0.564381	4.42966	-3.29968	0.00737903	0.040992	-2.59386	ENSMUSG00000010936	Vac14	-1
-0.564081	4.84258	-3.48801	0.0053185	0.0338273	-2.32945	ENSMUSG00000054455	Vapb	-1
-0.563327	5.56862	-3.35934	0.00665	0.0383774	-2.64752	ENSMUSG00000028857	Tmem222	-1
-0.562933	8.01266	-4.9947	0.00044699	0.00799577	-0.0233952	ENSMUSG00000028063	Lmna	-1
-0.562809	6.14029	-3.76203	0.00332132	0.0252082	-2.00534	ENSMUSG00000073982	Rhog	-1
-0.562228	4.58713	-3.26487	0.00784181	0.0426319	-2.67711	ENSMUSG00000024095	Hnrnpll	-1
-0.562161	5.39297	-3.69776	0.00370661	0.026914	-2.04152	ENSMUSG00000106917	Gm7832	-1
-0.562159	8.72765	-4.16916	0.00167535	0.0169011	-1.3772	ENSMUSG00000035674	Ndufa3	-1
-0.562139	6.89785	-3.51159	0.00510586	0.0330673	-2.48508	ENSMUSG00000014606	Slc25a11	-1
-0.561095	4.07466	-3.23831	0.00821456	0.0437749	-2.64546	ENSMUSG00000031823	Zdhhc7	-1
-0.560924	5.1175	-3.89513	0.00264982	0.0222841	-1.6697	ENSMUSG00000025228	Actr1a	-1
-0.560574	7.94905	-3.50245	0.00518725	0.0333782	-2.52437	ENSMUSG00000026568	Mpc2	-1
-0.560328	7.17459	-4.83295	0.000574759	0.0091826	-0.269599	ENSMUSG00000044018	Mrpl50	-1
-0.560245	7.38361	-4.84594	0.000563197	0.00911282	-0.253543	ENSMUSG00000025630	Hprt	-1
-0.559612	7.98131	-4.28081	0.00139365	0.0151232	-1.18886	ENSMUSG00000040824	Snrpd2	-1
-0.559224	9.82017	-4.66895	0.000744443	0.0104786	-0.540355	ENSMUSG00000025393	Atp5b	-1
-0.558693	8.64681	-4.60355	0.000826204	0.0111061	-0.654132	ENSMUSG00000057278	Snrpg	-1
-0.558516	5.22712	-3.3658	0.0065756	0.0381123	-2.59335	ENSMUSG00000032547	Ryk	-1
-0.558311	5.99457	-4.34338	0.00125793	0.0142092	-1.0089	ENSMUSG00000001380	Hars	-1
-0.558125	5.23749	-3.71911	0.00357372	0.0264312	-1.9853	ENSMUSG00000018761	Mpdu1	-1
-0.558062	6.41991	-4.01448	0.00216774	0.0198272	-1.59258	ENSMUSG00000020358	Hnrnpab	-1
-0.557984	3.98652	-3.13271	0.00988505	0.0495305	-2.81211	ENSMUSG00000002297	Dbf4	-1
-0.557609	5.74537	-3.72687	0.00352666	0.0262171	-2.03049	ENSMUSG00000070044	Fam149a	-1
-0.556828	5.33116	-3.65297	0.00400231	0.0284153	-2.11071	ENSMUSG00000057572	Zbtb8os	-1
-0.556218	5.79174	-4.207	0.00157373	0.0163169	-1.21895	ENSMUSG00000037070	Rbmxl1	-1
-0.55549	10.0544	-3.86854	0.00277171	0.0227651	-1.88056	ENSMUSG00000001175	Calm1	-1
-0.555366	6.77061	-4.81387	0.000592211	0.00924027	-0.286485	ENSMUSG00000044600	Smim7	-1
-0.555183	5.35226	-3.45171	0.00566375	0.0352075	-2.46091	ENSMUSG00000027163	Commd9	-1
-0.554658	5.03032	-3.44631	0.00571707	0.0352993	-2.42746	ENSMUSG00000033809	Alg3	-1
-0.554404	5.57423	-3.88067	0.00271542	0.0226224	-1.74918	ENSMUSG00000027531	Impa1	-1
-0.552899	7.56287	-4.44379	0.00106837	0.0128861	-0.91275	ENSMUSG00000028334	Nans	-1
-0.552625	4.97726	-3.13245	0.00988952	0.0495305	-2.96327	ENSMUSG00000066839	Ecsit	-1
-0.552581	6.00294	-3.71896	0.00357469	0.0264312	-2.0684	ENSMUSG00000009647	Mcu	-1
-0.551143	7.72359	-4.49805	0.000978676	0.0121345	-0.825012	ENSMUSG00000078348	Sf3b5	-1
-0.550643	7.92943	-4.57867	0.000859757	0.011287	-0.694089	ENSMUSG00000018965	Ywhah	-1
-0.549419	8.93673	-3.49796	0.00522769	0.0335128	-2.53177	ENSMUSG00000038690	Atp5j2	-1
-0.549181	6.36038	-4.58136	0.000856059	0.0112649	-0.642243	ENSMUSG00000021595	Nsun2	-1
-0.54856	8.62692	-4.13024	0.00178706	0.0174986	-1.44338	ENSMUSG00000044627	Swi5	-1
-0.548541	4.64231	-3.41411	0.00604572	0.0364121	-2.42816	ENSMUSG00000041733	Coq5	-1
-0.546621	7.85359	-4.71887	0.000687796	0.0100843	-0.464715	ENSMUSG00000020180	Snrpd3	-1
-0.546507	9.34074	-4.29138	0.00136968	0.0149695	-1.16817	ENSMUSG00000000563	Atp5f1	-1
-0.546234	7.07049	-4.81911	0.000587363	0.00921141	-0.288881	ENSMUSG00000020496	Rnf187	-1
-0.546025	5.64443	-3.58915	0.00446633	0.0304811	-2.25791	ENSMUSG00000029319	Coq2	-1
-0.545989	7.21748	-4.07567	0.001957	0.0185672	-1.52382	ENSMUSG00000049124	Gm8186	-1
-0.545983	5.89255	-3.33394	0.00695099	0.0395907	-2.72623	ENSMUSG00000028790	Khdrbs1	-1
-0.545902	5.38579	-3.7063	0.00365287	0.0267564	-2.026	ENSMUSG00000026974	Zmynd19	-1
-0.545736	7.1936	-4.38821	0.00116928	0.0135296	-0.997414	ENSMUSG00000048578	Mlec	-1
-0.545667	5.85281	-3.20434	0.00871797	0.0454871	-2.94847	ENSMUSG00000024782	Ak3	-1
-0.544766	8.91671	-3.8036	0.00309443	0.0241816	-2.00116	ENSMUSG00000037152	Ndufc1	-1
-0.544412	9.27322	-4.56032	0.000885423	0.0114863	-0.722135	ENSMUSG00000024844	Banf1	-1
-0.544346	7.10623	-4.42246	0.00110598	0.0131777	-0.937986	ENSMUSG00000063888	Rpl7l1	-1
-0.543668	5.90037	-3.76882	0.00328315	0.0250728	-1.97337	ENSMUSG00000112909	Gm10120	-1
-0.543169	4.79133	-3.26763	0.00780396	0.0425778	-2.70233	ENSMUSG00000044881	Coa4	-1
-0.543074	5.14187	-3.69014	0.00375528	0.0271527	-2.02269	ENSMUSG00000022711	Pmm2	-1
-0.542507	5.82821	-3.72573	0.00353353	0.0262256	-2.0408	ENSMUSG00000032667	Pon2	-1
-0.542479	6.50412	-3.99609	0.00223564	0.0201331	-1.62897	ENSMUSG00000016257	Prelid3b	-1
-0.542315	6.31054	-4.19959	0.00159312	0.0164445	-1.27234	ENSMUSG00000078652	Psme3	-1
-0.542273	4.77034	-3.23495	0.00826301	0.0439308	-2.75573	ENSMUSG00000026429	Ube2t	-1
-0.541768	6.97073	-3.17868	0.00911912	0.0468203	-3.06997	ENSMUSG00000023272	Creld2	-1
-0.541263	8.51752	-4.16211	0.00169504	0.0169851	-1.38969	ENSMUSG00000028837	Psmb2	-1
-0.540322	6.52393	-3.32914	0.00700938	0.0397584	-2.78404	ENSMUSG00000056941	Commd7	-1
-0.540191	7.54535	-4.77062	0.000633854	0.00957964	-0.377492	ENSMUSG00000014226	Cacybp	-1
-0.539677	5.64477	-3.31318	0.00720727	0.0403642	-2.73685	ENSMUSG00000022451	Twf1	-1
-0.539047	5.34679	-3.45941	0.00558865	0.0350099	-2.44693	ENSMUSG00000024082	Ndufaf7	-1
-0.53895	6.8913	-3.67565	0.00384965	0.0275882	-2.19958	ENSMUSG00000028719	Cmpk1	-1
-0.538938	6.35198	-3.58962	0.00446265	0.0304711	-2.31896	ENSMUSG00000001305	Rrp15	-1
-0.538352	7.00657	-4.06094	0.00200569	0.0188469	-1.54219	ENSMUSG00000044155	Lsm8	-1
-0.537768	5.20061	-3.21452	0.00856389	0.0449907	-2.85249	ENSMUSG00000041774	Ydjc	-1
-0.537681	9.11867	-3.44964	0.00568407	0.0352325	-2.6151	ENSMUSG00000018585	Atox1	-1
-0.537059	4.8294	-3.15067	0.0095783	0.0485202	-2.91003	ENSMUSG00000027540	Ptpn1	-1
-0.535612	7.03365	-4.41681	0.00111616	0.0132327	-0.945046	ENSMUSG00000002524	Puf60	-1
-0.535028	6.64824	-4.16166	0.0016963	0.0169853	-1.35602	ENSMUSG00000004788	Eif2b2	-1
-0.534223	9.01233	-4.48063	0.00100657	0.0123389	-0.854972	ENSMUSG00000029064	Gnb1	-1
-0.533356	6.7191	-3.91138	0.0025781	0.0219171	-1.78532	ENSMUSG00000078572	Ndufaf8	-1
-0.533252	6.83344	-4.27588	0.00140498	0.0151818	-1.17257	ENSMUSG00000024026	Glo1	-1
-0.532852	5.10471	-3.40552	0.00613665	0.0366386	-2.50817	ENSMUSG00000066441	Rdh11	-1
-0.532833	4.95473	-3.51951	0.00503646	0.0328854	-2.29075	ENSMUSG00000018322	Tomm34	-1
-0.532688	4.47119	-3.19898	0.00880034	0.0457349	-2.77348	ENSMUSG00000097711	Gm5523	-1
-0.531948	6.72752	-4.22613	0.00152483	0.0159909	-1.25131	ENSMUSG00000029623	Pdap1	-1
-0.531531	7.60555	-3.94189	0.00244887	0.0212658	-1.76005	ENSMUSG00000052151	Plpp2	-1
-0.531325	4.98176	-3.25338	0.00800096	0.0430879	-2.75441	ENSMUSG00000026496	Parp1	-1
-0.530796	5.50623	-3.92183	0.00253305	0.0217222	-1.67153	ENSMUSG00000032869	Psmf1	-1
-0.53057	7.71879	-3.65783	0.00396906	0.0282085	-2.25166	ENSMUSG00000039630	Hnrnpu	-1
-0.530247	8.30588	-4.6643	0.000749972	0.0105457	-0.555288	ENSMUSG00000030007	Cct7	-1
-0.530203	9.96252	-4.30051	0.00134933	0.0148416	-1.14784	ENSMUSG00000022890	Atp5j	-1
-0.529076	6.55985	-3.72035	0.00356615	0.0264107	-2.10563	ENSMUSG00000079426	Arpc4	-1
-0.528214	5.25332	-3.14282	0.0097111	0.0489242	-2.98405	ENSMUSG00000026798	Coq4	-1
-0.528193	8.59142	-4.09981	0.00187984	0.0180596	-1.4951	ENSMUSG00000021957	Tkt	-1
-0.528019	8.05168	-4.37818	0.00118851	0.013652	-1.02634	ENSMUSG00000004849	Ap1s1	-1
-0.527982	6.24028	-3.42253	0.00595795	0.0361925	-2.60163	ENSMUSG00000031803	B3gnt3	-1
-0.527599	6.90606	-3.59483	0.00442287	0.03032	-2.34052	ENSMUSG00000058126	Tpm3-rs7	-1
-0.527521	6.14248	-3.95191	0.0024079	0.021003	-1.67997	ENSMUSG00000035215	Lsm7	-1
-0.527258	5.93553	-3.36842	0.00654571	0.0379912	-2.6705	ENSMUSG00000062691	Cebpzos	-1
-0.526701	6.12546	-4.22146	0.00153664	0.016042	-1.22263	ENSMUSG00000036860	Mrpl55	-1
-0.526445	4.97956	-3.32807	0.00702246	0.0397817	-2.62477	ENSMUSG00000083793	Gm14274	-1
-0.526314	5.64268	-3.85539	0.00283411	0.0230385	-1.79986	ENSMUSG00000052997	Uba2	-1
-0.526071	8.2634	-3.67829	0.00383227	0.0275355	-2.21954	ENSMUSG00000090553	Snrpe	-1
-0.525573	7.26109	-3.82608	0.00297851	0.0237347	-1.95214	ENSMUSG00000026374	Tsn	-1
-0.525542	7.05894	-3.71255	0.00361406	0.0265934	-2.14212	ENSMUSG00000046434	Hnrnpa1	-1
-0.52388	6.76423	-3.84249	0.00289673	0.0233463	-1.9058	ENSMUSG00000057497	Fam136a	-1
-0.522973	8.10652	-3.14521	0.00967047	0.048861	-3.15037	ENSMUSG00000074457	S100a16	-1
-0.522152	6.04149	-3.39304	0.00627126	0.0370239	-2.63704	ENSMUSG00000003099	Ppp5c	-1
-0.521963	7.86147	-3.94263	0.00244582	0.0212658	-1.76165	ENSMUSG00000032959	Pebp1	-1
-0.52106	7.45991	-3.78663	0.00318505	0.0246453	-2.02464	ENSMUSG00000028671	Gale	-1
-0.519728	5.34248	-3.12754	0.00997512	0.0498321	-3.02267	ENSMUSG00000059363	Fxn	-1
-0.518358	7.18109	-4.18168	0.00164099	0.0167613	-1.34319	ENSMUSG00000028673	Fuca1	-1
-0.518269	5.72627	-3.23988	0.00819215	0.0437278	-2.87337	ENSMUSG00000085438	1700020I14Rik	-1
-0.518142	6.60113	-4.33886	0.00126726	0.0142468	-1.05626	ENSMUSG00000015869	Prpsap1	-1
-0.517885	7.76074	-4.04805	0.00204935	0.0191133	-1.58059	ENSMUSG00000006390	Elovl1	-1
-0.517485	7.42146	-3.95086	0.00241216	0.0210268	-1.74148	ENSMUSG00000034211	Mrps17	-1
-0.516874	6.41097	-3.90535	0.00260451	0.0220325	-1.77828	ENSMUSG00000025439	Clns1a	-1
-0.515191	5.26904	-3.18825	0.00896739	0.046331	-2.90741	ENSMUSG00000058704	Memo1	-1
-0.515177	4.74983	-3.3312	0.00698423	0.0397333	-2.58653	ENSMUSG00000098222	Gm8318	-1
-0.514993	7.8778	-4.369	0.00120644	0.0138002	-1.04056	ENSMUSG00000033047	Eif3l	-1
-0.51489	7.89755	-4.0809	0.00193999	0.0184696	-1.52591	ENSMUSG00000063628	Gm7665	-1
-0.514364	7.97522	-4.16907	0.0016756	0.0169011	-1.37695	ENSMUSG00000019494	Cops6	-1
-0.514295	7.35229	-3.81157	0.00305283	0.0240342	-1.97938	ENSMUSG00000024870	Rab1b	-1
-0.513937	6.70954	-3.99979	0.00222181	0.0200547	-1.63369	ENSMUSG00000024725	Ostf1	-1
-0.513807	8.17906	-4.03226	0.00210417	0.0194589	-1.61014	ENSMUSG00000008475	Arpc5	-1
-0.513178	8.02894	-3.41361	0.00605101	0.036428	-2.67998	ENSMUSG00000024038	Ndufv3	-1
-0.512527	8.80934	-4.1254	0.0018015	0.0175687	-1.45093	ENSMUSG00000010376	Nedd8	-1
-0.512332	7.22449	-3.72273	0.00355173	0.0263323	-2.12959	ENSMUSG00000020098	Pcbd1	-1
-0.511677	5.78859	-3.26597	0.00782666	0.0426103	-2.83467	ENSMUSG00000030204	Ddx47	-1
-0.510512	5.00641	-3.51915	0.00503959	0.0328902	-2.29853	ENSMUSG00000028261	Ndufaf4	-1
-0.51023	5.14759	-3.42423	0.00594034	0.0361579	-2.48167	ENSMUSG00000003464	Pex19	-1
-0.509951	6.99925	-4.13464	0.00177406	0.0174687	-1.41685	ENSMUSG00000037740	Mrps26	-1
-0.508171	5.93836	-3.3941	0.00625972	0.0370034	-2.626	ENSMUSG00000068267	Cenpb	-1
-0.50751	6.88124	-3.97247	0.00232607	0.0205767	-1.68814	ENSMUSG00000015759	Cnih1	-1
-0.50641	6.07562	-3.23207	0.00830483	0.0440264	-2.92078	ENSMUSG00000020778	Ten1	-1
-0.50557	5.97698	-3.74156	0.0034393	0.0258757	-2.0272	ENSMUSG00000024165	Jpt2	-1
-0.505152	7.601	-3.32805	0.00702271	0.0397817	-2.82536	ENSMUSG00000002416	Ndufb2	-1
-0.504988	7.23948	-3.81507	0.0030347	0.023967	-1.97048	ENSMUSG00000028861	Mrps15	-1
-0.504881	6.9925	-4.27011	0.00141837	0.0152928	-1.18834	ENSMUSG00000026966	Ssna1	-1
-0.504767	7.08974	-3.34618	0.00680425	0.0390626	-2.78119	ENSMUSG00000022757	Tfg	-1
-0.503965	6.02276	-3.58247	0.00451798	0.0306726	-2.30607	ENSMUSG00000036992	Nxt1	-1
-0.503854	6.46962	-3.3798	0.00641732	0.0374835	-2.69212	ENSMUSG00000027804	Ppid	-1
-0.503447	5.65891	-3.52624	0.00497824	0.0326493	-2.36837	ENSMUSG00000031781	Ciapin1	-1
-0.503239	5.42412	-3.36062	0.00663525	0.0383649	-2.62821	ENSMUSG00000037936	Scarb1	-1
-0.503209	8.02773	-3.82804	0.00296861	0.0236834	-1.95972	ENSMUSG00000023089	Ndufa5	-1
-0.50238	6.77804	-4.14424	0.00174603	0.0173066	-1.39172	ENSMUSG00000004937	Sgta	-1
-0.502351	5.18338	-3.5498	0.00477973	0.0318912	-2.26954	ENSMUSG00000037514	Pank2	-1
-0.501957	7.05293	-3.81236	0.00304874	0.0240342	-1.96943	ENSMUSG00000020265	Sumo3	-1
-0.501457	5.27569	-3.42351	0.00594775	0.0361857	-2.50005	ENSMUSG00000020087	Tysnd1	-1
-0.501452	5.69889	-3.76496	0.00330479	0.025153	-1.96065	ENSMUSG00000022466	Rpap3	-1
-0.500926	5.73249	-3.44405	0.0057395	0.0353478	-2.51888	ENSMUSG00000066149	Cdc26	-1
-0.500738	6.79613	-3.81731	0.00302321	0.0239245	-1.95061	ENSMUSG00000040028	Elavl1	-1
-0.49995	5.67745	-3.25689	0.0079519	0.0429426	-2.83853	ENSMUSG00000025155	Dus1l	-1
-0.49967	6.5219	-3.44344	0.00574555	0.035364	-2.58434	ENSMUSG00000095677	Dynlt1f	-1
-0.499578	5.44008	-3.59814	0.00439771	0.0302381	-2.21882	ENSMUSG00000030868	Dctn5	-1
-0.499483	6.94504	-3.87435	0.00274456	0.0226851	-1.85881	ENSMUSG00000014748	Tex261	-1
-0.498628	6.68441	-3.47604	0.00542983	0.0342808	-2.53668	ENSMUSG00000060152	Pop5	-1
-0.49838	6.68728	-3.3762	0.00645768	0.0377013	-2.71107	ENSMUSG00000028741	Mrto4	-1
-0.498263	5.94822	-3.85737	0.00282461	0.0230021	-1.82598	ENSMUSG00000031299	Pdha1	-1
-0.497704	6.59684	-4.16059	0.00169932	0.0169907	-1.35507	ENSMUSG00000062937	Mtap	-1
-0.497364	7.54826	-4.16804	0.00167847	0.0169022	-1.37415	ENSMUSG00000067194	Eif1ax	-1
-0.497178	8.93076	-3.74225	0.00343527	0.0258596	-2.10707	ENSMUSG00000031708	Tecr	-1
-0.49608	6.30914	-3.52395	0.0049979	0.0327426	-2.43008	ENSMUSG00000038459	Abhd17c	-1
-0.494611	5.63255	-3.20673	0.00868166	0.0454357	-2.92086	ENSMUSG00000078619	Smarcd2	-1
-0.494479	8.05659	-3.842	0.00289917	0.0233463	-1.93579	ENSMUSG00000078238	Gm12854	-1
-0.493084	5.78279	-3.82376	0.00299027	0.0238147	-1.86818	ENSMUSG00000024537	Psmg2	-1
-0.491476	9.09254	-3.60702	0.00433105	0.0299453	-2.34085	ENSMUSG00000061518	Cox5b	-1
-0.490943	6.20165	-3.14174	0.00972964	0.0489797	-3.08895	ENSMUSG00000014195	Dnajc7	-1
-0.489967	5.89097	-3.4575	0.00560714	0.0350938	-2.51123	ENSMUSG00000059689	Zfp637	-1
-0.489877	5.6125	-3.48486	0.00534757	0.0339644	-2.43499	ENSMUSG00000029715	Pop7	-1
-0.489233	5.61186	-3.44783	0.00570197	0.0352378	-2.49919	ENSMUSG00000021650	Ptcd2	-1
-0.489129	7.52443	-3.98859	0.00226395	0.0202782	-1.67877	ENSMUSG00000001576	Ergic1	-1
-0.488475	8.61963	-4.11641	0.00182861	0.0176912	-1.46679	ENSMUSG00000055762	Eef1d	-1
-0.487988	7.71753	-4.29972	0.00135107	0.0148489	-1.15479	ENSMUSG00000001416	Cct3	-1
-0.487531	7.60633	-3.54127	0.00485064	0.0321612	-2.45287	ENSMUSG00000080904	Gm11966	-1
-0.48705	5.61537	-3.506	0.00515546	0.0332778	-2.39876	ENSMUSG00000001016	Ilf2	-1
-0.486673	4.9367	-3.26696	0.0078132	0.0426037	-2.72445	ENSMUSG00000023707	Ogfod2	-1
-0.484642	6.37907	-3.89174	0.00266503	0.0223382	-1.79951	ENSMUSG00000041740	Rnf10	-1
-0.484591	7.11435	-3.57226	0.00459812	0.031026	-2.38735	ENSMUSG00000028165	Cisd2	-1
-0.484513	5.4779	-3.47118	0.00547576	0.0344915	-2.44303	ENSMUSG00000028069	Gpatch4	-1
-0.484221	7.23172	-3.61148	0.00429792	0.0298206	-2.32272	ENSMUSG00000021577	Sdha	-1
-0.483639	6.08799	-3.8367	0.00292531	0.0234469	-1.87298	ENSMUSG00000018666	Cbx1	-1
-0.482375	7.88061	-3.91576	0.00255911	0.0218638	-1.80782	ENSMUSG00000062580	Timm17a	-1
-0.480904	6.675	-3.7729	0.0032604	0.0250091	-2.02112	ENSMUSG00000028902	Sf3a3	-1
-0.480792	7.50143	-3.65185	0.00400996	0.0284316	-2.25872	ENSMUSG00000038812	Trmt112	-1
-0.480586	7.75712	-3.58301	0.00451375	0.0306726	-2.38209	ENSMUSG00000015937	H2afy	-1
-0.480108	7.37055	-3.3184	0.00714193	0.0401292	-2.83778	ENSMUSG00000031353	Rbbp7	-1
-0.479764	5.82238	-3.472	0.005468	0.0344584	-2.47964	ENSMUSG00000025103	Btbd1	-1
-0.47974	6.37874	-3.25949	0.00791586	0.0428311	-2.8962	ENSMUSG00000004945	Tmem242	-1
-0.479622	7.97459	-3.84009	0.00290855	0.0233673	-1.93858	ENSMUSG00000025204	Ndufb8	-1
-0.479367	6.577	-3.8534	0.00284366	0.0231025	-1.87721	ENSMUSG00000035478	Mbd3	-1
-0.479361	5.60488	-3.53682	0.00488807	0.0322846	-2.34409	ENSMUSG00000030770	Parva	-1
-0.478351	6.13331	-3.78282	0.00320578	0.0247561	-1.96905	ENSMUSG00000000743	Chmp1a	-1
-0.478303	9.36162	-4.15225	0.00172296	0.0171522	-1.40237	ENSMUSG00000059534	Uqcr10	-1
-0.477951	10.3042	-3.50599	0.00515554	0.0332778	-2.50612	ENSMUSG00000041697	Cox6a1	-1
-0.477619	7.98467	-3.47675	0.00542321	0.0342705	-2.5693	ENSMUSG00000058927	Gm10053	-1
-0.477477	8.34467	-4.13456	0.00177429	0.0174687	-1.43638	ENSMUSG00000071072	Ptges3	-1
-0.477464	6.51582	-3.87206	0.00275522	0.0227335	-1.84172	ENSMUSG00000064068	Mtx1	-1
-0.476572	5.73615	-3.46139	0.0055695	0.0349219	-2.48911	ENSMUSG00000115431	Gm3219	-1
-0.476126	5.53149	-3.15608	0.00948785	0.0481864	-2.99739	ENSMUSG00000051853	Arf3	-1
-0.476082	7.55638	-3.23345	0.00828484	0.0440264	-2.99021	ENSMUSG00000030512	Snrpa1	-1
-0.475898	6.71033	-3.7342	0.00348281	0.026032	-2.08974	ENSMUSG00000040842	Szrd1	-1
-0.475618	7.82946	-3.48978	0.00530222	0.0337856	-2.54532	ENSMUSG00000002102	Psmc3	-1
-0.475407	7.64532	-3.33458	0.00694314	0.0395887	-2.81448	ENSMUSG00000001847	Rac1	-1
-0.475046	5.9662	-3.5823	0.00451928	0.0306726	-2.30157	ENSMUSG00000006941	Eif1b	-1
-0.474896	7.56677	-4.1647	0.00168777	0.0169493	-1.38005	ENSMUSG00000030603	Psmc4	-1
-0.474516	5.07218	-3.24255	0.00815398	0.0435993	-2.786	ENSMUSG00000091786	Gm8425	-1
-0.474271	7.55313	-3.14416	0.00968839	0.0489064	-3.14656	ENSMUSG00000002379	Ndufa11	-1
-0.473047	7.80627	-4.0286	0.00211712	0.0195463	-1.61408	ENSMUSG00000003438	Timm50	-1
-0.471915	6.10484	-3.7271	0.00352528	0.0262171	-2.06285	ENSMUSG00000034432	Cops8	-1
-0.471511	7.24702	-3.34439	0.00682546	0.0390863	-2.78911	ENSMUSG00000030654	Arl6ip1	-1
-0.471009	8.23536	-3.69047	0.00375318	0.0271518	-2.19826	ENSMUSG00000019362	D8Ertd738e	-1
-0.470764	7.18173	-3.60938	0.00431349	0.0298837	-2.32496	ENSMUSG00000024571	Gm16286	-1
-0.469076	8.02468	-3.66143	0.00394464	0.028057	-2.24792	ENSMUSG00000067847	Romo1	-1
-0.467134	6.65795	-3.51402	0.00508448	0.0330107	-2.46911	ENSMUSG00000059355	Wdr83os	-1
-0.466553	5.55067	-3.22487	0.00841015	0.0444038	-2.87998	ENSMUSG00000038429	Usp5	-1
-0.465567	9.64351	-3.63294	0.00414233	0.0290195	-2.29177	ENSMUSG00000093798	Gm8355	-1
-0.465438	6.42406	-3.67113	0.00387956	0.0277112	-2.18237	ENSMUSG00000033918	Parl	-1
-0.465331	7.0169	-3.38056	0.00640886	0.0374665	-2.71834	ENSMUSG00000073155	1810058I24Rik	-1
-0.464713	8.23289	-3.92687	0.00251165	0.0215926	-1.79041	ENSMUSG00000021606	Ndufs6	-1
-0.464682	6.05501	-3.47617	0.00542861	0.0342808	-2.49358	ENSMUSG00000042303	Sgsm3	-1
-0.463476	9.16271	-3.27401	0.00771751	0.0422372	-2.9221	ENSMUSG00000024516	Sec11c	-1
-0.463307	6.78301	-3.50937	0.00512553	0.0331518	-2.48363	ENSMUSG00000044573	Acp1	-1
-0.461634	7.78168	-3.40657	0.00612549	0.0366081	-2.6902	ENSMUSG00000091537	Tma7	-1
-0.461343	6.69068	-3.84211	0.00289863	0.0233463	-1.90264	ENSMUSG00000051234	Rnf7	-1
-0.460177	6.11194	-3.44591	0.00572104	0.0352993	-2.55092	ENSMUSG00000074506	Gm10705	-1
-0.45994	5.87824	-3.47678	0.00542287	0.0342705	-2.47661	ENSMUSG00000039183	Nubp2	-1
-0.459669	5.45608	-3.13284	0.00988274	0.0495305	-3.0284	ENSMUSG00000040034	Nup43	-1
-0.459303	8.32327	-3.85542	0.00283394	0.0230385	-1.91327	ENSMUSG00000057666	Gapdh	-1
-0.45897	6.57297	-3.63338	0.00413919	0.0290124	-2.25681	ENSMUSG00000034781	Gna11	-1
-0.458415	9.42753	-3.91954	0.00254287	0.0217522	-1.79848	ENSMUSG00000023039	Krt7	-1
-0.45764	6.87082	-3.87099	0.00276025	0.022734	-1.8614	ENSMUSG00000030682	Cdipt	-1
-0.457305	7.12898	-3.76246	0.00331891	0.0252082	-2.05791	ENSMUSG00000025785	Exosc7	-1
-0.457088	7.39485	-3.90941	0.00258671	0.0219631	-1.81183	ENSMUSG00000014867	Surf4	-1
-0.454777	5.64597	-3.24832	0.00807199	0.0433006	-2.85028	ENSMUSG00000025858	Get4	-1
-0.454621	6.46423	-3.23937	0.00819934	0.0437278	-2.93706	ENSMUSG00000022858	Tra2b	-1
-0.453139	9.91807	-3.99788	0.00222892	0.0200924	-1.66025	ENSMUSG00000056201	Cfl1	-1
-0.451415	5.96448	-3.58316	0.00451263	0.0306726	-2.30004	ENSMUSG00000023452	Pisd	-1
-0.449677	7.5408	-3.28586	0.00755934	0.0416979	-2.89809	ENSMUSG00000022338	Eny2	-1
-0.449671	6.87197	-3.3342	0.00694776	0.0395887	-2.7934	ENSMUSG00000033735	Spr	-1
-0.449624	5.21011	-3.2623	0.0078771	0.0427223	-2.77088	ENSMUSG00000041438	Utp4	-1
-0.449427	10.0348	-3.78983	0.00316777	0.0245592	-2.01637	ENSMUSG00000035885	Cox8a	-1
-0.448709	6.09588	-3.57656	0.00456424	0.0308428	-2.32258	ENSMUSG00000020629	Adi1	-1
-0.448007	7.23008	-3.62382	0.00420769	0.0293963	-2.30114	ENSMUSG00000032199	Polr2m	-1
-0.443704	9.08588	-3.60937	0.00431354	0.0298837	-2.33676	ENSMUSG00000038374	Rbm8a	-1
-0.443407	6.50694	-3.58966	0.00446236	0.0304711	-2.32879	ENSMUSG00000038965	Ube2l3	-1
-0.442742	5.8861	-3.53654	0.00489039	0.0322846	-2.37369	ENSMUSG00000031916	Cog8	-1
-0.442667	7.86262	-3.67283	0.00386828	0.027664	-2.22692	ENSMUSG00000004667	Polr2e	-1
-0.4422	5.5215	-3.2257	0.00839798	0.0443566	-2.87506	ENSMUSG00000028484	Psip1	-1
-0.441689	8.02663	-3.27713	0.00767553	0.042128	-2.91871	ENSMUSG00000006315	Tmem147	-1
-0.440934	5.78678	-3.44981	0.0056824	0.0352325	-2.5147	ENSMUSG00000031157	Pqbp1	-1
-0.439767	6.5889	-3.37356	0.00648741	0.0377523	-2.71014	ENSMUSG00000030750	Nsmce1	-1
-0.43969	5.96514	-3.39007	0.00630375	0.0370677	-2.63568	ENSMUSG00000038510	Rpf2	-1
-0.439145	5.63176	-3.27629	0.00768682	0.0421563	-2.79997	ENSMUSG00000053644	Aldh7a1	-1
-0.437683	7.80966	-3.21883	0.00849959	0.0447728	-3.01911	ENSMUSG00000046432	Bex3	-1
-0.437456	6.38052	-3.48797	0.00531884	0.0338273	-2.49752	ENSMUSG00000018196	Glrx2	-1
-0.433614	5.74319	-3.16003	0.00942229	0.047942	-3.01475	ENSMUSG00000016344	Ppdpf	-1
-0.433584	6.75423	-3.41809	0.00600404	0.0362993	-2.6413	ENSMUSG00000024369	Nelfe	-1
-0.431725	5.55	-3.14664	0.00964627	0.0487661	-3.01612	ENSMUSG00000029440	Psmd9	-1
-0.431056	7.2864	-3.23121	0.00831738	0.044048	-2.98824	ENSMUSG00000029247	Paics	-1
-0.429756	9.44589	-3.6981	0.00370444	0.0269126	-2.18026	ENSMUSG00000036438	Calm2	-1
-0.427611	6.27254	-3.2727	0.00773514	0.0423031	-2.86543	ENSMUSG00000046865	Fbl	-1
-0.42672	6.01653	-3.24927	0.00805858	0.0432742	-2.88574	ENSMUSG00000059005	Hnrnpa3	-1
-0.426049	6.89046	-3.19919	0.00879706	0.0457349	-3.0304	ENSMUSG00000022706	Mrpl40	-1
-0.424925	6.18479	-3.29358	0.00745812	0.0412811	-2.82239	ENSMUSG00000031198	Fundc2	-1
-0.423851	8.83355	-3.51181	0.00510394	0.0330673	-2.50796	ENSMUSG00000028757	Ddost	-1
-0.422456	6.93632	-3.45909	0.00559175	0.0350134	-2.57792	ENSMUSG00000020708	Psmc5	-1
-0.422105	7.48027	-3.30176	0.00735236	0.0409099	-2.86907	ENSMUSG00000026260	Ndufa10	-1
-0.420092	7.71128	-3.40558	0.00613596	0.0366386	-2.69102	ENSMUSG00000027006	Dnajc10	-1
-0.420059	7.38691	-3.71554	0.00359565	0.026519	-2.14583	ENSMUSG00000005575	Ube2m	-1
-0.418708	6.92377	-3.22858	0.0083557	0.0442183	-2.98038	ENSMUSG00000022039	Adam2	-1
-0.417841	7.26005	-3.41422	0.00604456	0.0364121	-2.66719	ENSMUSG00000026254	Eif4e2	-1
-0.415887	6.89076	-3.39973	0.00619867	0.0368646	-2.67959	ENSMUSG00000029147	Ppm1g	-1
-0.411394	7.5371	-3.29195	0.00747933	0.0413651	-2.88727	ENSMUSG00000030541	Idh2	-1
-0.411281	6.76973	-3.32967	0.00700292	0.0397546	-2.79641	ENSMUSG00000027479	Mapre1	-1
-0.411214	7.29003	-3.20447	0.00871599	0.0454871	-3.0351	ENSMUSG00000025364	Pa2g4	-1
-0.408841	5.88256	-3.21918	0.00849434	0.0447728	-2.92595	ENSMUSG00000024414	Mrpl27	-1
-0.407842	11.0096	-3.18016	0.00909545	0.0467639	-3.06639	ENSMUSG00000027907	S100a11	-1
-0.406988	9.58343	-3.32277	0.00708773	0.0399718	-2.83356	ENSMUSG00000034566	Atp5h	-1
-0.405925	6.23385	-3.30545	0.00730515	0.0406967	-2.80535	ENSMUSG00000042305	Tmem183a	-1
-0.405345	8.21624	-3.45325	0.00564863	0.0351453	-2.61117	ENSMUSG00000027940	Tpm3	-1
-0.405122	5.83962	-3.14384	0.00969371	0.0489064	-3.05309	ENSMUSG00000010054	Tusc2	-1
-0.404608	8.30004	-3.2685	0.00779217	0.0425473	-2.9346	ENSMUSG00000021484	Lman2	-1
-0.402369	8.34849	-3.53855	0.00487345	0.0322813	-2.46243	ENSMUSG00000021771	Vdac2	-1
-0.401519	8.00414	-3.56774	0.00463411	0.0311617	-2.41054	ENSMUSG00000027506	Tpd52	-1
-0.400295	8.37243	-3.42199	0.00596355	0.036203	-2.66596	ENSMUSG00000021546	Hnrnpk	-1
-0.39997	7.29648	-3.19422	0.00887407	0.0459872	-3.05319	ENSMUSG00000019428	Fkbp8	-1
-0.399952	6.92874	-3.39715	0.00622653	0.0369339	-2.68565	ENSMUSG00000015290	Ubl4a	-1
-0.398498	7.11326	-3.33128	0.00698323	0.0397333	-2.80774	ENSMUSG00000024446	Rpp21	-1
-0.396688	8.75128	-3.38323	0.00637911	0.0373715	-2.73292	ENSMUSG00000038462	Uqcrfs1	-1
-0.396488	6.39782	-3.28257	0.00760289	0.0418412	-2.85697	ENSMUSG00000063480	Snu13	-1
-0.395386	7.97691	-3.16037	0.00941663	0.047931	-3.12283	ENSMUSG00000079111	Kdelr2	-1
-0.395125	6.4447	-3.17244	0.00921935	0.0471364	-3.05263	ENSMUSG00000074247	Dda1	-1
-0.393881	8.88633	-3.44971	0.0056834	0.0352325	-2.61612	ENSMUSG00000028745	Capzb	-1
-0.391888	6.78519	-3.29143	0.00748621	0.0413866	-2.86402	ENSMUSG00000039041	Adrm1	-1
-0.39141	6.47199	-3.1428	0.00971149	0.0489242	-3.10619	ENSMUSG00000028156	Eif4e	-1
-0.388414	7.37189	-3.26341	0.00786183	0.0426773	-2.93382	ENSMUSG00000023286	Ube2j2	-1
-0.387181	8.70603	-3.49633	0.00524244	0.0335604	-2.53542	ENSMUSG00000051695	Pcbp1	-1
-0.387019	6.74865	-3.18574	0.00900688	0.0464651	-3.04705	ENSMUSG00000001100	Poldip2	-1
-0.380272	6.89532	-3.19107	0.00892317	0.0461372	-3.04466	ENSMUSG00000006998	Psmd2	-1
-0.379591	10.1674	-3.2033	0.00873398	0.0455285	-3.03701	ENSMUSG00000015656	Hspa8	-1
-0.374817	8.04936	-3.14386	0.0096935	0.0489064	-3.15214	ENSMUSG00000069622	Gm10273	-1
-0.374212	6.65232	-3.23257	0.00829758	0.0440264	-2.95995	ENSMUSG00000019689	Fmc1	-1
-0.373967	6.51668	-3.17762	0.00913602	0.0468673	-3.04809	ENSMUSG00000037149	Ddx1	-1
-0.373925	7.70103	-3.3603	0.00663891	0.0383699	-2.76999	ENSMUSG00000025613	Cct8	-1
-0.367314	8.57879	-3.14478	0.00967783	0.0488801	-3.15105	ENSMUSG00000020849	Ywhae	-1
-0.366376	8.60174	-3.31575	0.00717498	0.0402326	-2.85147	ENSMUSG00000029994	Anxa4	-1
-0.362589	8.39022	-3.24239	0.00815622	0.0435993	-2.98029	ENSMUSG00000006699	Cdc42	-1
-0.35944	7.82931	-3.207	0.00867745	0.045431	-3.03983	ENSMUSG00000033020	Polr2f	-1
0.410842	6.09206	3.29562	0.00743155	0.0411506	-2.80471	ENSMUSG00000034789	Rab24	1
0.412018	7.78927	3.41926	0.00599191	0.0362629	-2.66381	ENSMUSG00000044279	Crb3	1
0.412486	6.72005	3.31286	0.00721126	0.0403701	-2.81611	ENSMUSG00000031532	Saraf	1
0.41762	6.92346	3.53004	0.00494561	0.0325095	-2.4466	ENSMUSG00000037499	Nenf	1
0.428131	6.2015	3.24049	0.00818329	0.04371	-2.90917	ENSMUSG00000036323	Srp72	1
0.429004	9.16009	3.64212	0.0040775	0.0288003	-2.27834	ENSMUSG00000006519	Cyba	1
0.435776	6.39219	3.50582	0.00515712	0.0332778	-2.46008	ENSMUSG00000030403	Vasp	1
0.450317	6.03181	3.4369	0.00581109	0.0356396	-2.55271	ENSMUSG00000029068	Ccnl2	1
0.457185	5.47382	3.34842	0.00677768	0.0389752	-2.64631	ENSMUSG00000020745	Pafah1b1	1
0.460216	8.02888	3.64096	0.00408566	0.0288245	-2.27963	ENSMUSG00000022528	Hes1	1
0.460463	7.20431	3.33424	0.00694735	0.0395887	-2.79847	ENSMUSG00000115039	Gm7043	1
0.468088	8.83749	3.30094	0.00736292	0.0409521	-2.87497	ENSMUSG00000022283	Pabpc1	1
0.468655	6.92566	3.33024	0.00699591	0.0397498	-2.79482	ENSMUSG00000009585	Apobec3	1
0.471086	7.28049	3.71925	0.00357289	0.0264312	-2.13031	ENSMUSG00000034088	Hdlbp	1
0.472295	5.21724	3.19737	0.00882516	0.0457855	-2.87588	ENSMUSG00000029817	Tra2a	1
0.474754	7.50915	3.68336	0.00379916	0.0273794	-2.19833	ENSMUSG00000038235	F11r	1
0.477438	6.6482	3.89646	0.00264388	0.0222696	-1.79923	ENSMUSG00000028419	Chmp5	1
0.478009	5.87193	3.76638	0.00329682	0.0251193	-1.96732	ENSMUSG00000025544	Tm9sf2	1
0.481484	5.64076	3.13075	0.00991918	0.0496248	-3.04522	ENSMUSG00000028426	Rad23b	1
0.48316	5.95978	3.57963	0.00454011	0.0307554	-2.2973	ENSMUSG00000044857	Lemd2	1
0.489665	7.10604	4.0983	0.00188456	0.0180923	-1.47468	ENSMUSG00000003402	Prkcsh	1
0.490154	8.54943	3.4154	0.00603212	0.0364101	-2.67481	ENSMUSG00000020048	Hsp90b1	1
0.490866	11.9199	3.3913	0.00629025	0.0370677	-2.68048	ENSMUSG00000019505	Ubb	1
0.492501	5.52433	3.71726	0.00358507	0.0264937	-2.01429	ENSMUSG00000030341	Tnfrsf1a	1
0.499303	6.23083	3.26336	0.00786249	0.0426773	-2.86983	ENSMUSG00000006740	Kif5b	1
0.501392	8.3829	3.84413	0.00288869	0.0233303	-1.9297	ENSMUSG00000052837	Junb	1
0.503568	5.1238	3.30245	0.00734348	0.0408772	-2.67987	ENSMUSG00000019877	Serinc1	1
0.503694	5.25526	3.59595	0.00441433	0.0302771	-2.1903	ENSMUSG00000000440	Pparg	1
0.50674	4.91024	3.17033	0.00925351	0.0472583	-2.87915	ENSMUSG00000002885	Adgre5	1
0.507717	5.60201	3.80179	0.00310396	0.0242285	-1.87802	ENSMUSG00000013787	Ehmt2	1
0.509057	5.84825	3.48599	0.00533708	0.0339134	-2.44944	ENSMUSG00000026566	Mpzl1	1
0.511558	7.44464	4.20246	0.00158559	0.016421	-1.3081	ENSMUSG00000025823	Pdia4	1
0.513479	4.90686	3.20379	0.00872645	0.0455141	-2.82015	ENSMUSG00000022453	Naga	1
0.515633	5.87959	3.53821	0.00487638	0.0322825	-2.36192	ENSMUSG00000071650	Ganab	1
0.516267	8.64614	3.59909	0.00439052	0.0302247	-2.35433	ENSMUSG00000044285	Gm1821	1
0.521817	6.36142	3.77184	0.00326629	0.0250264	-1.99634	ENSMUSG00000038467	Chmp4b	1
0.522936	9.69357	4.47992	0.00100774	0.0123389	-0.851034	ENSMUSG00000025351	Cd63	1
0.5309	5.5584	3.40706	0.00612024	0.0366081	-2.55307	ENSMUSG00000004846	Plod3	1
0.532101	6.38544	3.53714	0.00488537	0.0322825	-2.40332	ENSMUSG00000038387	Rras	1
0.532474	4.98244	3.51608	0.00506641	0.03294	-2.29084	ENSMUSG00000043131	Mob1a	1
0.533992	7.27348	4.01793	0.00215526	0.0197376	-1.61604	ENSMUSG00000040525	Cblc	1
0.534015	7.22229	4.33302	0.00127941	0.0143248	-1.08292	ENSMUSG00000022255	Mtdh	1
0.534382	5.77362	3.68155	0.00381096	0.0274253	-2.10145	ENSMUSG00000095288	Gm7618	1
0.535705	5.73989	3.50067	0.00520324	0.0334386	-2.41024	ENSMUSG00000021215	Net1	1
0.544719	6.48053	3.40953	0.00609404	0.036543	-2.63127	ENSMUSG00000098274	Rpl24	1
0.545335	7.57333	4.4193	0.00111165	0.0132209	-0.947702	ENSMUSG00000027706	Sec62	1
0.547437	6.18056	4.29151	0.0013694	0.0149695	-1.1013	ENSMUSG00000026553	Copa	1
0.548503	7.70135	3.79574	0.00313606	0.0244236	-2.00686	ENSMUSG00000020009	Ifngr1	1
0.551356	8.07379	3.57023	0.00461425	0.0310811	-2.40237	ENSMUSG00000022505	Emp2	1
0.552066	5.91756	4.06557	0.00199026	0.0187661	-1.45952	ENSMUSG00000061136	Prpf40a	1
0.55219	8.08243	3.1704	0.00925243	0.0472583	-3.10148	ENSMUSG00000055447	Cd47	1
0.552793	5.78116	3.22804	0.00836356	0.0442258	-2.88952	ENSMUSG00000063406	Tmed5	1
0.556066	7.1131	3.18126	0.00907795	0.0467264	-3.06171	ENSMUSG00000031897	Psmb10	1
0.55876	5.48844	3.15296	0.00953989	0.0483865	-2.98592	ENSMUSG00000021638	Ocln	1
0.566151	6.22762	3.53395	0.00491236	0.0323674	-2.39834	ENSMUSG00000021754	Map3k1	1
0.569449	5.34736	4.1768	0.0016543	0.016831	-1.2133	ENSMUSG00000027366	Sppl2a	1
0.571058	9.52607	3.81218	0.00304964	0.0240342	-1.98156	ENSMUSG00000063354	Slc39a4	1
0.57301	7.9964	4.44964	0.0010583	0.012821	-0.902817	ENSMUSG00000018171	Vmp1	1
0.573668	5.3669	3.6744	0.0038579	0.027609	-2.06746	ENSMUSG00000029422	Rsrc2	1
0.574455	4.51713	3.42308	0.00595225	0.0361857	-2.38346	ENSMUSG00000031600	Vps37a	1
0.57543	11.0015	3.49322	0.0052707	0.0336645	-2.51832	ENSMUSG00000050621	Rps27rt	1
0.576609	5.16077	3.78605	0.00318822	0.0246481	-1.84993	ENSMUSG00000069049	Eif2s3y	1
0.576621	5.53625	3.15676	0.00947644	0.0481675	-2.98551	ENSMUSG00000079457	Gm7609	1
0.577759	5.29086	4.1852	0.00163146	0.0166971	-1.19245	ENSMUSG00000024392	Bag6	1
0.577809	6.44842	3.77373	0.00325579	0.0249877	-1.99683	ENSMUSG00000038393	Txnip	1
0.578134	5.68341	3.43176	0.0058632	0.0358089	-2.52236	ENSMUSG00000036305	Rpl39-ps	1
0.578207	10.9793	3.51139	0.00510764	0.0330673	-2.48698	ENSMUSG00000090733	Rps27	1
0.580542	5.32136	3.45245	0.00565651	0.0351784	-2.44385	ENSMUSG00000025484	Bet1l	1
0.581022	4.70085	3.44745	0.0057057	0.035245	-2.36916	ENSMUSG00000028423	Nfx1	1
0.581818	6.44446	4.75585	0.000648786	0.00971977	-0.35558	ENSMUSG00000032458	Copb2	1
0.587964	5.66014	3.69657	0.0037142	0.0269549	-2.06334	ENSMUSG00000033542	Arhgef5	1
0.5883	6.04934	3.93872	0.00246199	0.0213259	-1.68575	ENSMUSG00000019818	Cd164	1
0.590557	5.14326	3.51534	0.00507289	0.0329666	-2.31151	ENSMUSG00000067058	Rps15a-ps5	1
0.591764	6.0792	4.09582	0.00189237	0.0180925	-1.42129	ENSMUSG00000028466	Creb3	1
0.592334	6.50198	4.29862	0.00135352	0.0148638	-1.10928	ENSMUSG00000037266	Rsrp1	1
0.595429	5.5693	4.0647	0.00199314	0.0187803	-1.42502	ENSMUSG00000024493	Lars	1
0.597958	6.35915	4.05484	0.00202624	0.0189751	-1.51037	ENSMUSG00000021036	Sptlc2	1
0.598547	6.05865	3.53538	0.00490025	0.0323341	-2.38106	ENSMUSG00000058838	Rps27a-ps2	1
0.598877	4.37614	3.13457	0.00985289	0.0494513	-2.859	ENSMUSG00000045095	Magi1	1
0.603642	3.85393	3.13145	0.00990699	0.0495819	-2.78038	ENSMUSG00000037949	Ano10	1
0.608603	4.75282	3.71329	0.00360945	0.0265737	-1.9203	ENSMUSG00000014791	Elmo3	1
0.609589	9.46955	4.67913	0.000732503	0.0104173	-0.525609	ENSMUSG00000056501	Cebpb	1
0.613493	10.4929	3.6047	0.00434837	0.0300191	-2.33123	ENSMUSG00000079641	Rpl39	1
0.615022	4.00128	3.2079	0.00866382	0.0454257	-2.67089	ENSMUSG00000045251	Zfp688	1
0.624008	4.10384	3.61279	0.00428823	0.0297838	-1.99872	ENSMUSG00000035621	Midn	1
0.62423	6.23771	3.46308	0.00555323	0.0348676	-2.52102	ENSMUSG00000020250	Txnrd1	1
0.624878	8.06748	4.20869	0.00156936	0.0162839	-1.30582	ENSMUSG00000031770	Herpud1	1
0.6314	5.18644	4.0502	0.00204198	0.0190787	-1.40482	ENSMUSG00000032376	Usp3	1
0.635232	6.96088	3.20317	0.00873585	0.0455285	-3.01572	ENSMUSG00000018848	Rars	1
0.640982	4.96739	4.23377	0.00150575	0.0158716	-1.07237	ENSMUSG00000025232	Hexa	1
0.64165	3.88343	3.39067	0.00629716	0.0370677	-2.34138	ENSMUSG00000028514	Usp24	1
0.642375	4.12965	3.25818	0.00793397	0.0428784	-2.60689	ENSMUSG00000025366	Esyt1	1
0.644728	4.94833	3.3887	0.00631877	0.037113	-2.50367	ENSMUSG00000032300	1700017B05Rik	1
0.645127	3.96013	3.5558	0.00473051	0.0316242	-2.07488	ENSMUSG00000002625	Akap8l	1
0.646889	5.26564	4.23356	0.00150628	0.0158716	-1.10686	ENSMUSG00000029767	Calu	1
0.64763	6.59903	5.05135	0.000409675	0.00766954	0.107514	ENSMUSG00000085939	Cd63-ps	1
0.653067	3.79553	3.40177	0.00617671	0.0367736	-2.31103	ENSMUSG00000046062	Ppp1r15b	1
0.654495	3.84738	3.12902	0.00994937	0.0497577	-2.78376	ENSMUSG00000015755	Tab2	1
0.655525	4.21454	3.70602	0.00365459	0.0267564	-1.85666	ENSMUSG00000027646	Src	1
0.65984	4.93567	4.18951	0.00161987	0.0166197	-1.14184	ENSMUSG00000021190	Lgmn	1
0.663755	4.6748	3.73212	0.00349519	0.0261104	-1.87704	ENSMUSG00000003458	Ncstn	1
0.664327	4.92661	3.79816	0.00312322	0.0243374	-1.7974	ENSMUSG00000019254	Ppp1r12c	1
0.664686	5.49585	3.17413	0.00919211	0.0470496	-2.94877	ENSMUSG00000033577	Myo6	1
0.664858	5.66594	3.75352	0.00336988	0.0254623	-1.96438	ENSMUSG00000050390	C77080	1
0.66628	4.11045	3.36818	0.00654848	0.0379912	-2.41456	ENSMUSG00000026958	Dpp7	1
0.666327	5.01591	4.04335	0.00206549	0.0192247	-1.39398	ENSMUSG00000032475	Nck1	1
0.666383	4.86544	4.03874	0.0020815	0.0193147	-1.38324	ENSMUSG00000063785	Utp14a	1
0.668798	5.44278	3.34334	0.00683802	0.039142	-2.64577	ENSMUSG00000022565	Plec	1
0.67274	4.58446	3.26614	0.00782436	0.0426103	-2.66011	ENSMUSG00000009905	Kdsr	1
0.673847	3.89934	3.29081	0.00749427	0.0414144	-2.51435	ENSMUSG00000021108	Prkch	1
0.674421	5.39928	4.83949	0.000568912	0.00916873	-0.137009	ENSMUSG00000031007	Atp6ap2	1
0.675442	5.15362	3.47349	0.00545387	0.0343964	-2.38331	ENSMUSG00000063001	Gm9701	1
0.675918	6.21051	4.90839	0.000510932	0.00858777	-0.0965123	ENSMUSG00000020282	Rhbdf1	1
0.676828	7.17578	4.61256	0.000814403	0.0109904	-0.617943	ENSMUSG00000039218	Srrm2	1
0.679402	6.31087	3.81991	0.00300988	0.0238753	-1.90641	ENSMUSG00000031960	Aars	1
0.680326	12.2991	3.58415	0.00450493	0.0306726	-2.33948	ENSMUSG00000022037	Clu	1
0.681532	4.26703	3.27601	0.0076905	0.0421596	-2.5934	ENSMUSG00000084265	Gm14541	1
0.682025	4.12823	3.87436	0.00274452	0.0226851	-1.56188	ENSMUSG00000029221	Slc30a9	1
0.682303	5.49607	3.74414	0.00342419	0.0258071	-1.95951	ENSMUSG00000037851	Iars	1
0.682603	3.5298	3.14888	0.00960843	0.0486204	-2.69549	ENSMUSG00000050891	Tatdn1	1
0.682964	4.38641	3.83093	0.00295412	0.0236089	-1.66856	ENSMUSG00000040433	Zbtb38	1
0.685805	4.31763	3.2049	0.00870953	0.0454816	-2.727	ENSMUSG00000020937	Plcd3	1
0.686971	5.27363	4.4313	0.00109023	0.0130633	-0.781222	ENSMUSG00000029426	Scarb2	1
0.687149	3.82998	3.39691	0.00622913	0.0369339	-2.32286	ENSMUSG00000024817	Uhrf2	1
0.688052	3.54412	3.43276	0.00585302	0.0358009	-2.21994	ENSMUSG00000038446	Cdc40	1
0.68851	4.93383	3.84083	0.00290489	0.0233673	-1.72653	ENSMUSG00000043336	Filip1l	1
0.689181	4.54333	3.9884	0.00226465	0.0202782	-1.42583	ENSMUSG00000023243	Kcnk5	1
0.690469	4.91814	3.607	0.00433115	0.0299453	-2.12085	ENSMUSG00000020982	Nemf	1
0.690963	6.26911	3.80059	0.00311032	0.0242643	-1.93807	ENSMUSG00000033295	Ptprf	1
0.693783	4.29881	3.14653	0.00964815	0.0487661	-2.82311	ENSMUSG00000020817	Rabep1	1
0.694152	4.88687	3.71589	0.00359344	0.026519	-1.93233	ENSMUSG00000030161	Gabarapl1	1
0.695738	5.40806	4.23391	0.00150541	0.0158716	-1.12323	ENSMUSG00000055065	Ddx17	1
0.700928	3.79985	3.18456	0.00902548	0.0465436	-2.67867	ENSMUSG00000035133	Arhgap5	1
0.701405	6.47732	3.46015	0.00558144	0.0349807	-2.54091	ENSMUSG00000006418	Rnf114	1
0.701604	3.74581	3.45096	0.00567108	0.0352212	-2.21809	ENSMUSG00000034485	Uaca	1
0.70197	3.74339	3.58447	0.00450246	0.0306726	-1.99206	ENSMUSG00000108437	Gm19366	1
0.702824	6.46013	4.46608	0.00103052	0.0125397	-0.826611	ENSMUSG00000020865	Abcc3	1
0.704019	4.02861	3.72915	0.00351298	0.0261721	-1.79101	ENSMUSG00000036644	Tbc1d9b	1
0.704577	4.34229	3.33953	0.00688349	0.0393132	-2.49898	ENSMUSG00000056537	Rlim	1
0.705579	5.18452	5.02536	0.000426371	0.00784111	0.175973	ENSMUSG00000033159	Cnppd1	1
0.705825	3.44246	3.41417	0.00604503	0.0364121	-2.23591	ENSMUSG00000035093	Secisbp2l	1
0.705886	3.99754	3.41288	0.00605861	0.0364452	-2.32071	ENSMUSG00000005699	Pard6a	1
0.70643	4.37557	3.3268	0.00703802	0.0398222	-2.52516	ENSMUSG00000039852	Rere	1
0.708493	5.30308	4.19705	0.00159981	0.0164755	-1.16972	ENSMUSG00000021751	Acox2	1
0.708916	7.42894	5.3819	0.0002486	0.00589944	0.592768	ENSMUSG00000022216	Psme1	1
0.710118	4.3	3.77429	0.00325266	0.0249776	-1.75309	ENSMUSG00000040359	Ufl1	1
0.710273	7.52767	4.85808	0.00055261	0.00900491	-0.228904	ENSMUSG00000030560	Ctsc	1
0.710397	4.25174	3.7391	0.00345381	0.0259565	-1.80489	ENSMUSG00000035547	Capn5	1
0.71104	6.02018	4.34832	0.00124783	0.0141558	-0.990812	ENSMUSG00000025809	Itgb1	1
0.712459	4.6416	3.20845	0.00865554	0.0454027	-2.77134	ENSMUSG00000028617	Lrrc42	1
0.713352	3.5667	3.51868	0.00504365	0.0328981	-2.07771	ENSMUSG00000028771	Ptpn12	1
0.714608	3.55332	3.20719	0.00867463	0.045431	-2.6006	ENSMUSG00000049232	Tigd2	1
0.715831	3.32448	3.27934	0.00764589	0.0419989	-2.445	ENSMUSG00000039096	Rsad1	1
0.717424	4.16251	3.78983	0.00316776	0.0245592	-1.70528	ENSMUSG00000042323	Pbrm1	1
0.717675	3.71989	3.23101	0.00832032	0.044048	-2.58661	ENSMUSG00000031529	Tnks	1
0.719361	12.6551	4.73129	0.000674426	0.00998413	-0.404598	ENSMUSG00000101111	Gm28437	1
0.719528	3.22175	3.17763	0.00913591	0.0468673	-2.60104	ENSMUSG00000004317	Clcn5	1
0.720219	4.32247	3.18703	0.00898659	0.0463953	-2.75689	ENSMUSG00000059263	Usp47	1
0.720961	4.66334	3.6823	0.00380604	0.0274043	-1.95679	ENSMUSG00000024811	Tnks2	1
0.722273	4.81064	3.4684	0.00550225	0.0346017	-2.34613	ENSMUSG00000043241	Upf2	1
0.722734	7.23809	4.12618	0.00179918	0.0175672	-1.42865	ENSMUSG00000078153	Psme2b	1
0.723269	3.44211	3.54764	0.00479758	0.0319637	-2.01265	ENSMUSG00000020605	Hs1bp3	1
0.724327	3.66423	3.65173	0.00401081	0.0284316	-1.86899	ENSMUSG00000024120	Lrpprc	1
0.726153	4.97737	4.8157	0.00059051	0.00922915	-0.130154	ENSMUSG00000037824	Tspan14	1
0.726174	4.98821	3.80826	0.00307004	0.0241007	-1.78549	ENSMUSG00000029188	Slc34a2	1
0.72719	4.24014	3.75965	0.00333486	0.0252838	-1.76878	ENSMUSG00000045767	B230219D22Rik	1
0.727691	4.64556	3.90023	0.00262712	0.0221555	-1.58637	ENSMUSG00000018765	Fxr2	1
0.727846	3.9041	3.49266	0.00527586	0.0336645	-2.17035	ENSMUSG00000036528	Ppfibp2	1
0.728306	7.74445	6.10894	8.74766e-05	0.00348512	1.6594	ENSMUSG00000027620	Rbm39	1
0.728751	4.73552	3.87124	0.00275907	0.022734	-1.64694	ENSMUSG00000037236	Matr3	1
0.728866	4.96906	3.85837	0.00281982	0.0229767	-1.69942	ENSMUSG00000001089	Luzp1	1
0.729726	6.02415	4.57363	0.000866725	0.0113401	-0.619776	ENSMUSG00000047126	Cltc	1
0.732061	3.94007	3.59988	0.00438457	0.0302234	-1.99643	ENSMUSG00000022515	Anks3	1
0.73328	4.97463	3.86461	0.00279018	0.0228572	-1.68979	ENSMUSG00000009035	Tmem184b	1
0.734426	5.26426	3.4088	0.0061017	0.0365729	-2.50729	ENSMUSG00000026994	Galnt3	1
0.735135	3.58663	3.39006	0.00630385	0.0370677	-2.29759	ENSMUSG00000036822	Topors	1
0.736176	2.89331	3.23301	0.00829111	0.0440264	-2.45753	ENSMUSG00000044345	Marveld1	1
0.736289	6.09413	4.0135	0.00217132	0.0198467	-1.5591	ENSMUSG00000049401	Ogfr	1
0.737034	5.55442	4.02279	0.00213778	0.019671	-1.48953	ENSMUSG00000031098	Syt8	1
0.737181	4.69436	3.5701	0.00461534	0.0310811	-2.15414	ENSMUSG00000038095	Sbno1	1
0.73752	4.11976	3.45489	0.00563259	0.0351394	-2.26434	ENSMUSG00000029823	Luc7l2	1
0.737643	4.49922	3.70967	0.00363191	0.0266962	-1.88956	ENSMUSG00000021488	Nsd1	1
0.737754	3.61383	3.49279	0.00527466	0.0336645	-2.12835	ENSMUSG00000024491	Rbm27	1
0.739004	6.321	3.25631	0.00796	0.0429515	-2.88311	ENSMUSG00000032369	Plscr1	1
0.740487	4.90597	3.67062	0.00388296	0.0277112	-2.00966	ENSMUSG00000042644	Itpr3	1
0.74132	4.93093	3.93654	0.00247101	0.0213558	-1.56304	ENSMUSG00000086158	Ccpg1os	1
0.74152	4.76702	3.59921	0.00438961	0.0302247	-2.11325	ENSMUSG00000027189	Trim44	1
0.742107	10.5409	3.28575	0.00756074	0.0416979	-2.88713	ENSMUSG00000064363	mt-Nd4	1
0.742176	7.81434	3.42426	0.00594004	0.0361579	-2.65242	ENSMUSG00000068739	Sars	1
0.745497	3.21974	3.47717	0.00541925	0.0342705	-2.09877	ENSMUSG00000020828	Pld2	1
0.747743	5.05982	4.33683	0.00127147	0.0142708	-0.911076	ENSMUSG00000063172	Hspb11	1
0.748346	3.60213	3.47701	0.00542071	0.0342705	-2.1524	ENSMUSG00000038213	Tapbpl	1
0.748981	3.63374	3.51148	0.00510684	0.0330673	-2.10013	ENSMUSG00000001632	Brpf1	1
0.749608	4.31167	3.19886	0.00880208	0.0457349	-2.73075	ENSMUSG00000002227	Mov10	1
0.749643	5.47188	3.17549	0.00917018	0.0470075	-2.93929	ENSMUSG00000021431	Snrnp48	1
0.752185	5.13251	3.97824	0.00230363	0.0204907	-1.51652	ENSMUSG00000033228	Scaf11	1
0.752195	5.15069	4.56256	0.000882243	0.0114583	-0.55231	ENSMUSG00000073725	Lmbrd1	1
0.752237	5.14055	4.27558	0.00140568	0.0151818	-1.02174	ENSMUSG00000040774	Cept1	1
0.752271	4.91551	4.41413	0.00112102	0.0132482	-0.767817	ENSMUSG00000033499	Larp4b	1
0.75287	12.1754	3.88849	0.00267975	0.0224327	-1.81565	ENSMUSG00000100862	Gm10925	1
0.752993	3.28523	3.39761	0.00622158	0.0369339	-2.23902	ENSMUSG00000021133	Susd6	1
0.753494	6.03757	5.43413	0.000230061	0.00570501	0.731016	ENSMUSG00000031939	Taf1d	1
0.754543	4.64692	4.79996	0.000605276	0.00934301	-0.119482	ENSMUSG00000020400	Tnip1	1
0.754834	3.85959	3.42133	0.00597041	0.0362126	-2.28467	ENSMUSG00000008730	Hipk1	1
0.755032	3.20173	3.19266	0.00889826	0.046043	-2.57249	ENSMUSG00000027598	Itch	1
0.755766	3.47905	3.1368	0.00981434	0.0493339	-2.70384	ENSMUSG00000021051	Ppp2r5e	1
0.756059	4.35307	4.16633	0.00168322	0.0169283	-1.10579	ENSMUSG00000043733	Ptpn11	1
0.757345	3.7341	3.72599	0.00353201	0.0262256	-1.75485	ENSMUSG00000008200	Fnbp4	1
0.757742	5.66067	3.64074	0.00408721	0.0288245	-2.15721	ENSMUSG00000064357	mt-Atp6	1
0.758313	4.46265	4.24183	0.00148589	0.0157542	-0.995758	ENSMUSG00000045045	Lrfn4	1
0.759357	3.97164	3.21896	0.00849757	0.0447728	-2.64781	ENSMUSG00000030967	Zranb1	1
0.761124	10.2285	4.1739	0.00166226	0.0168782	-1.35732	ENSMUSG00000008348	Ubc	1
0.7615	3.43727	3.4365	0.00581515	0.0356486	-2.19648	ENSMUSG00000049076	Acap2	1
0.761562	4.05419	3.49483	0.00525607	0.0336163	-2.19142	ENSMUSG00000037119	Fam91a1	1
0.762886	4.26338	3.32759	0.00702832	0.0397837	-2.5059	ENSMUSG00000030539	Sema4b	1
0.762909	5.30585	4.38315	0.00117895	0.0136104	-0.861022	ENSMUSG00000020936	Nmt1	1
0.763551	4.38425	4.39943	0.00114812	0.0134051	-0.729309	ENSMUSG00000027829	Ccnl1	1
0.76486	3.30891	3.46595	0.0055256	0.0347258	-2.12836	ENSMUSG00000026627	Tmem206	1
0.765799	3.54399	3.58277	0.00451562	0.0306726	-1.96644	ENSMUSG00000022750	Klhl22	1
0.765926	6.62256	5.40253	0.000241093	0.00583546	0.651276	ENSMUSG00000029467	Atp2a2	1
0.767235	5.95882	4.04652	0.0020546	0.0191363	-1.49074	ENSMUSG00000031438	Rnf128	1
0.768427	6.22519	4.4042	0.00113926	0.0133555	-0.912757	ENSMUSG00000050565	Tor1aip2	1
0.7691	3.70146	3.87995	0.0027187	0.0226233	-1.49449	ENSMUSG00000035900	Gramd4	1
0.769231	8.953	3.9224	0.00253064	0.0217222	-1.79429	ENSMUSG00000033880	Lgals3bp	1
0.769576	11.0349	4.13429	0.0017751	0.0174687	-1.4141	ENSMUSG00000075602	Ly6a	1
0.770599	3.25603	3.13626	0.00982355	0.0493621	-2.67249	ENSMUSG00000024687	Osbp	1
0.771135	3.30419	3.25595	0.00796502	0.0429617	-2.47646	ENSMUSG00000037172	E330009J07Rik	1
0.772656	3.59654	3.4825	0.00536949	0.0340721	-2.14256	ENSMUSG00000032501	Trib1	1
0.774559	7.08769	4.55538	0.000892465	0.0115159	-0.706899	ENSMUSG00000040713	Creg1	1
0.775862	4.82382	3.73525	0.00347656	0.0260136	-1.88639	ENSMUSG00000024404	Riok3	1
0.776234	5.39677	3.99532	0.00223852	0.0201331	-1.5176	ENSMUSG00000018707	Dync1h1	1
0.776653	7.33752	4.31403	0.00131979	0.0146319	-1.11464	ENSMUSG00000036478	Btg1	1
0.777138	3.87066	3.58022	0.00453553	0.0307396	-2.01804	ENSMUSG00000046447	Camk2n1	1
0.777323	5.56008	5.07026	0.000397972	0.00761467	0.211705	ENSMUSG00000018736	Ndel1	1
0.778285	3.2589	3.24562	0.0081102	0.0434378	-2.48915	ENSMUSG00000069539	Scyl2	1
0.778677	6.64068	5.01261	0.000434824	0.0079016	0.046941	ENSMUSG00000024991	Eif3a	1
0.779266	5.2408	4.74985	0.000654952	0.00975893	-0.26171	ENSMUSG00000037465	Klf10	1
0.779854	4.34288	3.2004	0.00877849	0.0456731	-2.73229	ENSMUSG00000040010	Slc7a5	1
0.779918	3.30459	3.41046	0.00608418	0.0365317	-2.22094	ENSMUSG00000036333	Kidins220	1
0.780789	4.55327	4.66078	0.000754176	0.0105751	-0.327766	ENSMUSG00000028954	Nub1	1
0.780964	4.04694	3.55996	0.0046967	0.0314748	-2.07758	ENSMUSG00000022307	Oxr1	1
0.781199	3.02398	3.32195	0.00709775	0.0399744	-2.32813	ENSMUSG00000097048	1600020E01Rik	1
0.782594	3.17567	3.43384	0.00584206	0.0357657	-2.16437	ENSMUSG00000048118	Arid4a	1
0.782854	5.76575	3.17475	0.00918207	0.0470333	-2.97129	ENSMUSG00000025278	Flnb	1
0.783636	5.21518	3.54903	0.00478615	0.031903	-2.25914	ENSMUSG00000057554	Lgals8	1
0.783645	3.30508	3.25069	0.00803866	0.0432232	-2.48881	ENSMUSG00000026484	Rnf2	1
0.784002	4.71647	4.51263	0.000955952	0.0119716	-0.584464	ENSMUSG00000025034	Trim8	1
0.784812	5.46917	3.54358	0.00483136	0.0321109	-2.29892	ENSMUSG00000030793	Pycard	1
0.78492	3.84062	3.91252	0.00257317	0.0219092	-1.45857	ENSMUSG00000040850	Psme4	1
0.786241	4.74566	4.64941	0.000767944	0.0106137	-0.367133	ENSMUSG00000014905	Dnajb9	1
0.786813	4.23195	3.1344	0.00985571	0.0494513	-2.83194	ENSMUSG00000027639	Samhd1	1
0.787112	7.14479	3.67479	0.00385529	0.027609	-2.19889	ENSMUSG00000041737	Tmem45b	1
0.792247	5.13785	4.1655	0.00168553	0.0169392	-1.20459	ENSMUSG00000034252	Senp6	1
0.792693	5.54039	5.41866	0.000235394	0.00575417	0.747256	ENSMUSG00000022895	Ets2	1
0.79327	4.26688	3.86051	0.00280962	0.0229344	-1.59982	ENSMUSG00000061755	Bod1l	1
0.795396	4.81153	3.82048	0.00300695	0.0238753	-1.74182	ENSMUSG00000038733	Wdr26	1
0.795737	5.64983	5.72119	0.000151296	0.00447954	1.18551	ENSMUSG00000026740	Dnajc1	1
0.796917	3.23446	3.23748	0.0082265	0.0437767	-2.49879	ENSMUSG00000006920	Ezh1	1
0.797372	7.96757	5.57503	0.000187013	0.00499099	0.877535	ENSMUSG00000022961	Son	1
0.798164	6.07044	3.77611	0.00324262	0.0249308	-1.95945	ENSMUSG00000015652	Steap1	1
0.798607	3.6587	3.26897	0.00778582	0.0425295	-2.5096	ENSMUSG00000000489	Pdgfb	1
0.799141	5.39054	5.18949	0.000331863	0.00694342	0.411558	ENSMUSG00000011114	Tbrg1	1
0.799532	8.97927	4.23807	0.00149513	0.0158244	-1.25765	ENSMUSG00000041028	Ghitm	1
0.800092	5.7455	5.2886	0.000285791	0.00646821	0.533136	ENSMUSG00000020572	Nampt	1
0.800105	3.86528	3.70808	0.00364176	0.026736	-1.80045	ENSMUSG00000022533	Atp13a3	1
0.80214	3.5424	4.0018	0.00221433	0.0200311	-1.27411	ENSMUSG00000021192	Golga5	1
0.804125	3.82682	3.70345	0.00367069	0.0268234	-1.80377	ENSMUSG00000040859	Bsdc1	1
0.804261	7.55137	3.18086	0.00908424	0.0467413	-3.07213	ENSMUSG00000023067	Cdkn1a	1
0.804598	8.09624	6.05608	9.41463e-05	0.00364658	1.58126	ENSMUSG00000030738	Eif3c	1
0.8047	3.46421	3.23703	0.00823308	0.0437886	-2.53649	ENSMUSG00000030064	Frmd4b	1
0.805302	5.10029	4.91706	0.00050409	0.00853954	0.0169694	ENSMUSG00000052707	Tnrc6a	1
0.80598	6.99192	3.74061	0.00344491	0.0259038	-2.07737	ENSMUSG00000030605	Mfge8	1
0.806878	3.39386	3.2815	0.00761717	0.0418746	-2.44869	ENSMUSG00000078676	Casc3	1
0.806947	2.7186	3.27143	0.00775236	0.0423635	-2.3676	ENSMUSG00000032333	Stoml1	1
0.807091	3.80887	3.67628	0.00384548	0.0275745	-1.84519	ENSMUSG00000020196	Cabin1	1
0.807649	3.78512	3.87007	0.00276454	0.0227518	-1.52143	ENSMUSG00000027665	Pik3ca	1
0.811942	2.85351	3.34451	0.00682408	0.0390863	-2.26907	ENSMUSG00000109325	Krt8-ps	1
0.813647	3.05927	3.16043	0.00941565	0.047931	-2.60171	ENSMUSG00000023892	Zfp51	1
0.814425	5.75693	4.9695	0.000464738	0.00815398	0.0390464	ENSMUSG00000056429	Tgoln1	1
0.815145	3.62025	3.35588	0.00669017	0.0385689	-2.3551	ENSMUSG00000047888	Tnrc6b	1
0.815365	3.70567	3.28103	0.00762345	0.0418924	-2.49664	ENSMUSG00000034850	Tmem127	1
0.815521	3.28223	3.32618	0.00704565	0.0398366	-2.35886	ENSMUSG00000000600	Krit1	1
0.816948	4.8186	4.98802	0.000451628	0.00802589	0.156657	ENSMUSG00000020385	Clk4	1
0.817917	4.35092	3.56656	0.00464356	0.0311947	-2.10631	ENSMUSG00000034573	Ptpn13	1
0.820484	4.9136	3.48005	0.00539231	0.0341538	-2.33746	ENSMUSG00000026971	Itgb6	1
0.821299	5.09063	4.17116	0.00166982	0.0168907	-1.18699	ENSMUSG00000045624	Esf1	1
0.822004	4.88547	3.56253	0.00467597	0.0313665	-2.194	ENSMUSG00000031785	Adgrg1	1
0.822988	8.41936	4.82289	0.00058389	0.0091826	-0.294282	ENSMUSG00000079197	Psme2	1
0.823271	4.34534	4.11795	0.00182395	0.017671	-1.1834	ENSMUSG00000036461	Elf1	1
0.824192	4.69662	4.40414	0.00113937	0.0133555	-0.754664	ENSMUSG00000020076	Ddx50	1
0.825308	3.61322	3.50279	0.0051842	0.0333742	-2.11138	ENSMUSG00000020422	Tns3	1
0.825587	4.41048	4.32255	0.00130151	0.0145141	-0.855667	ENSMUSG00000029189	Sel1l3	1
0.825597	5.02602	4.16771	0.0016794	0.0169022	-1.18554	ENSMUSG00000019132	BC005537	1
0.825845	4.66219	5.07241	0.000396658	0.00760079	0.301869	ENSMUSG00000026219	Trip12	1
0.82636	2.72914	3.31771	0.00715044	0.0401606	-2.29437	ENSMUSG00000019088	Dnase1l1	1
0.826488	3.33241	3.68314	0.00380059	0.0273794	-1.76895	ENSMUSG00000060012	Kif13b	1
0.828118	6.13454	5.41476	0.000236757	0.0057772	0.69531	ENSMUSG00000028980	H6pd	1
0.829749	5.95579	4.34057	0.00126371	0.0142314	-0.994988	ENSMUSG00000062753	AI413582	1
0.830358	3.95533	4.02311	0.00213665	0.019671	-1.2868	ENSMUSG00000028830	AU040320	1
0.830501	6.62532	5.89306	0.000118373	0.00397441	1.37935	ENSMUSG00000064358	mt-Co3	1
0.830733	2.97331	3.51684	0.00505975	0.032928	-1.9972	ENSMUSG00000004895	Prcc	1
0.830915	3.81897	3.61976	0.00423721	0.0295187	-1.94172	ENSMUSG00000013846	St3gal1	1
0.831014	2.88638	3.25009	0.00804703	0.0432512	-2.42595	ENSMUSG00000039623	Ap5z1	1
0.832586	4.38039	4.65185	0.000764963	0.0106132	-0.323535	ENSMUSG00000050212	Eva1b	1
0.833461	2.53357	3.31187	0.00722372	0.0404069	-2.27933	ENSMUSG00000021483	Cdk20	1
0.833812	3.3178	3.1939	0.00887898	0.0459929	-2.58035	ENSMUSG00000021240	Abcd4	1
0.833956	6.36659	4.21908	0.00154266	0.0160675	-1.22838	ENSMUSG00000047180	Neurl3	1
0.834428	3.52547	3.45363	0.00564487	0.0351453	-2.18079	ENSMUSG00000039477	Tnrc18	1
0.834571	3.85334	3.76304	0.0033156	0.0252082	-1.70656	ENSMUSG00000037519	Ppfia1	1
0.834771	4.70517	3.8892	0.00267652	0.0224207	-1.60783	ENSMUSG00000018476	Kdm6b	1
0.834898	5.62512	4.10291	0.00187016	0.0180076	-1.36072	ENSMUSG00000052825	Gm9892	1
0.83584	6.93467	4.22453	0.00152888	0.0160211	-1.24975	ENSMUSG00000092203	1110038B12Rik	1
0.836018	6.24464	3.93312	0.0024853	0.0214332	-1.70465	ENSMUSG00000024597	Slc12a2	1
0.836128	4.13019	3.94224	0.0024474	0.0212658	-1.4472	ENSMUSG00000027677	Ttc14	1
0.83682	4.794	3.93202	0.00248994	0.0214597	-1.54924	ENSMUSG00000020315	Sptbn1	1
0.837232	5.86232	4.65007	0.000767133	0.0106132	-0.480693	ENSMUSG00000035011	Zbtb7a	1
0.837362	3.68146	4.17668	0.00165463	0.016831	-1.00397	ENSMUSG00000022607	Ptk2	1
0.837673	3.73276	3.1494	0.00959961	0.0486102	-2.72136	ENSMUSG00000042772	Smg7	1
0.83777	3.42537	3.56668	0.00464261	0.0311947	-1.97546	ENSMUSG00000084284	Tpt1-ps6	1
0.838739	3.91141	4.52598	0.000935628	0.0117818	-0.47159	ENSMUSG00000028309	Rnf20	1
0.839212	5.80127	4.47593	0.00101425	0.0123965	-0.757407	ENSMUSG00000028645	Slc2a1	1
0.839582	3.77592	3.79203	0.00315593	0.0245228	-1.64987	ENSMUSG00000040785	Ttc3	1
0.839746	7.10965	6.05802	9.38915e-05	0.00364658	1.60014	ENSMUSG00000036606	Plxnb2	1
0.840706	3.00079	3.38055	0.00640896	0.0374665	-2.2231	ENSMUSG00000041483	Zfp281	1
0.841584	4.59983	3.85906	0.00281656	0.0229637	-1.64811	ENSMUSG00000027111	Itga6	1
0.842388	3.59833	3.76285	0.00331672	0.0252082	-1.6738	ENSMUSG00000031608	Galnt7	1
0.842949	5.91912	4.71124	0.00069616	0.0101289	-0.387365	ENSMUSG00000032042	Srpr	1
0.844276	3.19979	3.449	0.00569045	0.0352325	-2.13674	ENSMUSG00000028654	Mycl	1
0.844652	6.2217	3.28576	0.00756065	0.0416979	-2.82045	ENSMUSG00000073802	Cdkn2b	1
0.844997	2.85516	3.59815	0.00439762	0.0302381	-1.85029	ENSMUSG00000024943	Smc5	1
0.847921	3.60006	3.24252	0.00815427	0.0435993	-2.54312	ENSMUSG00000034401	Spata6	1
0.848678	4.04853	3.88612	0.00269049	0.0224829	-1.5239	ENSMUSG00000094870	Zfp131	1
0.849563	4.1779	3.85652	0.00282869	0.0230217	-1.59233	ENSMUSG00000021302	Ggps1	1
0.849774	4.60133	4.34515	0.0012543	0.0142057	-0.840783	ENSMUSG00000039770	Ypel5	1
0.849964	4.60314	4.67531	0.000736968	0.0104347	-0.309722	ENSMUSG00000031229	Atrx	1
0.850172	4.7439	4.51144	0.000957786	0.0119837	-0.586846	ENSMUSG00000055204	Ankrd17	1
0.85029	4.80831	3.7937	0.00314697	0.0244808	-1.78542	ENSMUSG00000029684	Wasl	1
0.850821	4.38674	4.70937	0.000698218	0.0101289	-0.231987	ENSMUSG00000068250	Amn1	1
0.850823	2.94668	3.6636	0.00392998	0.0280177	-1.75524	ENSMUSG00000024614	Tmx3	1
0.851324	4.64952	4.00888	0.00218821	0.0199745	-1.40242	ENSMUSG00000034667	Xpot	1
0.851337	3.29318	3.20531	0.00870323	0.0454792	-2.55984	ENSMUSG00000037486	Asxl2	1
0.851533	4.86525	4.97659	0.000459668	0.00809605	0.134878	ENSMUSG00000025873	Faf2	1
0.851756	4.58847	4.58618	0.000849478	0.0112321	-0.450993	ENSMUSG00000019947	Arid5b	1
0.852301	3.19837	3.55267	0.00475616	0.0317802	-1.97036	ENSMUSG00000059482	2610301B20Rik	1
0.853296	6.68443	5.45805	0.000222065	0.00556702	0.733607	ENSMUSG00000068036	Afdn	1
0.853745	3.94033	3.40689	0.00612203	0.0366081	-2.31717	ENSMUSG00000041362	Shtn1	1
0.853769	5.78137	3.85235	0.00284873	0.0231285	-1.80111	ENSMUSG00000026342	Slc35f5	1
0.85403	2.95419	3.39504	0.0062495	0.0369908	-2.19411	ENSMUSG00000036534	Slc38a7	1
0.854841	3.37015	3.45504	0.00563113	0.0351394	-2.1517	ENSMUSG00000024050	Wiz	1
0.856368	4.38925	4.77577	0.000628743	0.00957614	-0.129369	ENSMUSG00000095687	Rnaset2a	1
0.856628	4.57755	4.32432	0.00129775	0.0144947	-0.872986	ENSMUSG00000025047	Pdcd11	1
0.856727	3.58672	3.80915	0.00306538	0.0240952	-1.59339	ENSMUSG00000068758	Il3ra	1
0.858238	4.23777	4.53603	0.000920629	0.0116891	-0.490394	ENSMUSG00000020954	Strn3	1
0.859456	3.26518	4.02733	0.00212161	0.0195615	-1.1994	ENSMUSG00000022772	Senp5	1
0.860875	3.57952	3.90772	0.0025941	0.0219851	-1.42912	ENSMUSG00000003032	Klf4	1
0.86179	4.1756	3.87993	0.00271881	0.0226233	-1.55559	ENSMUSG00000066406	Akap13	1
0.862965	3.52559	3.13246	0.0098894	0.0495305	-2.71368	ENSMUSG00000017291	Taok1	1
0.863178	4.60228	3.42792	0.00590238	0.0360066	-2.38194	ENSMUSG00000074063	Osgin1	1
0.866102	4.40818	3.96276	0.00236435	0.0207812	-1.44867	ENSMUSG00000022475	Hdac7	1
0.866275	3.30644	3.88098	0.00271396	0.0226224	-1.43996	ENSMUSG00000053754	Chd8	1
0.866954	3.37583	3.76173	0.00332305	0.0252082	-1.6466	ENSMUSG00000020747	Tmem94	1
0.867031	3.62963	3.32974	0.00700209	0.0397546	-2.39645	ENSMUSG00000020910	Adprm	1
0.871084	4.01428	3.20028	0.00878022	0.0456731	-2.67494	ENSMUSG00000058317	Ube2e2	1
0.871376	7.6048	6.57984	4.62161e-05	0.00251951	2.31582	ENSMUSG00000024308	Tapbp	1
0.871511	9.60645	4.0195	0.0021496	0.0197164	-1.62481	ENSMUSG00000021996	Esd	1
0.871982	7.18771	5.86816	0.000122626	0.00402063	1.32514	ENSMUSG00000062300	Nectin2	1
0.872169	6.62332	5.50328	0.000207745	0.00533458	0.805358	ENSMUSG00000022564	Grina	1
0.873352	6.77463	5.80218	0.000134706	0.00423405	1.24224	ENSMUSG00000031328	Flna	1
0.874245	3.48577	4.02789	0.00211961	0.0195562	-1.22352	ENSMUSG00000020640	Itsn2	1
0.875085	3.34085	4.08748	0.00191883	0.0182935	-1.11186	ENSMUSG00000020536	Llgl1	1
0.875555	5.06489	4.62203	0.000802188	0.0108576	-0.446126	ENSMUSG00000004591	Pkn2	1
0.87577	3.45095	3.91587	0.00255868	0.0218638	-1.40115	ENSMUSG00000022641	Bbx	1
0.875787	3.19423	3.69846	0.00370217	0.0269126	-1.72694	ENSMUSG00000033669	Zfp7	1
0.87621	7.41246	6.73888	3.7501e-05	0.00231157	2.53253	ENSMUSG00000000303	Cdh1	1
0.876259	4.41683	5.09455	0.000383447	0.00746146	0.360352	ENSMUSG00000056050	Mia3	1
0.877923	9.33619	6.41165	5.78501e-05	0.00281825	2.08007	ENSMUSG00000073411	H2-D1	1
0.878317	2.79519	3.38595	0.00634899	0.0372586	-2.18718	ENSMUSG00000069045	Ddx3y	1
0.878492	4.79675	4.1085	0.00185284	0.0178627	-1.25269	ENSMUSG00000066258	Trim12a	1
0.879621	3.50398	3.79164	0.00315804	0.0245253	-1.61388	ENSMUSG00000042364	Snx18	1
0.880567	3.67362	3.21655	0.0085336	0.0448992	-2.59786	ENSMUSG00000043154	Ppp2r3a	1
0.88076	8.25787	6.68076	4.04618e-05	0.0023676	2.44608	ENSMUSG00000025647	Shisa5	1
0.881434	3.89678	3.37598	0.0064601	0.0377013	-2.3676	ENSMUSG00000023966	Rsph9	1
0.882817	2.70402	3.25688	0.00795209	0.0429426	-2.38917	ENSMUSG00000012126	Ubxn11	1
0.885263	2.78602	3.59216	0.0044432	0.0304139	-1.85099	ENSMUSG00000073664	Nbeal1	1
0.885959	4.42658	3.26313	0.00786569	0.0426773	-2.63229	ENSMUSG00000067851	Arfgef1	1
0.886078	4.60155	3.57913	0.00454408	0.0307672	-2.11888	ENSMUSG00000039361	Picalm	1
0.888469	4.55023	5.21292	0.0003203	0.00682866	0.527034	ENSMUSG00000026014	Raph1	1
0.889836	3.258	3.32612	0.00704637	0.0398366	-2.34759	ENSMUSG00000033703	Fuk	1
0.890091	3.52182	3.1795	0.00910593	0.0468003	-2.63922	ENSMUSG00000037816	Fbxw17	1
0.890686	4.51795	4.31752	0.00131226	0.0145857	-0.871969	ENSMUSG00000030852	Tacc2	1
0.891641	2.90417	3.46526	0.0055322	0.0347514	-2.07506	ENSMUSG00000037533	Rapgef6	1
0.891712	3.71937	3.17002	0.00925852	0.0472663	-2.68473	ENSMUSG00000027782	Kpna4	1
0.891781	3.93956	3.70115	0.00368519	0.0268656	-1.82148	ENSMUSG00000023972	Ptk7	1
0.892443	3.34379	3.34719	0.00679227	0.0390101	-2.32888	ENSMUSG00000026604	Ptpn14	1
0.892554	3.7969	3.64125	0.00408361	0.0288245	-1.89948	ENSMUSG00000026426	Arl8a	1
0.892596	2.78976	3.46828	0.00550333	0.0346017	-2.05418	ENSMUSG00000032217	Rnf111	1
0.892671	4.56161	4.2665	0.00142681	0.0153617	-0.965127	ENSMUSG00000040146	Rgl3	1
0.893131	7.29763	4.69809	0.000710807	0.0102574	-0.478586	ENSMUSG00000002233	Rhoc	1
0.893186	4.49712	3.23199	0.00830592	0.0440264	-2.69913	ENSMUSG00000081251	Gm12164	1
0.893512	6.66711	5.90859	0.000115801	0.00391841	1.40118	ENSMUSG00000048489	8430408G22Rik	1
0.893841	3.78555	4.38518	0.00117505	0.0135768	-0.681446	ENSMUSG00000020790	Ankfy1	1
0.894213	6.55872	3.45413	0.00564001	0.0351394	-2.55269	ENSMUSG00000047407	Tgif1	1
0.894784	4.51792	4.80046	0.000604801	0.00934301	-0.10423	ENSMUSG00000018395	Kif3a	1
0.895033	3.06998	3.36478	0.00658728	0.0381196	-2.25932	ENSMUSG00000078671	Chd2	1
0.896694	4.46097	4.97754	0.000458995	0.00809457	0.178283	ENSMUSG00000042608	Stk40	1
0.898154	2.72217	3.14221	0.00972156	0.048957	-2.5777	ENSMUSG00000046230	Vps13a	1
0.898517	3.99488	4.27778	0.00140061	0.0151627	-0.877197	ENSMUSG00000040481	Bptf	1
0.899384	3.34966	3.18723	0.00898336	0.0463953	-2.60198	ENSMUSG00000036097	Slf2	1
0.899686	4.09371	3.54647	0.00480734	0.0320132	-2.10381	ENSMUSG00000032712	2810474O19Rik	1
0.900692	3.24214	3.54509	0.0048188	0.032074	-1.98561	ENSMUSG00000021360	Gcnt2	1
0.900874	5.27275	4.54462	0.000908011	0.0116148	-0.593919	ENSMUSG00000020994	Pnn	1
0.902662	5.29065	3.56617	0.00464667	0.0312004	-2.23446	ENSMUSG00000003623	Crot	1
0.90295	6.50384	3.74228	0.00343511	0.0258596	-2.05064	ENSMUSG00000045991	Onecut2	1
0.903427	4.73214	5.05528	0.000407215	0.00766954	0.269202	ENSMUSG00000101970	1810026B05Rik	1
0.90427	3.57049	4.25925	0.00144391	0.0154863	-0.858291	ENSMUSG00000051343	Rab11fip5	1
0.904423	5.0127	4.76967	0.000634809	0.00958318	-0.203464	ENSMUSG00000020432	Tcn2	1
0.90457	3.75394	4.48489	0.000999683	0.0122731	-0.519843	ENSMUSG00000034269	Setd5	1
0.904948	6.11432	4.28435	0.00138557	0.0150871	-1.10143	ENSMUSG00000022865	Cxadr	1
0.905541	4.47265	3.54149	0.0048488	0.0321612	-2.16604	ENSMUSG00000082361	Btc	1
0.907197	4.22796	4.81348	0.000592566	0.00924027	-0.0517497	ENSMUSG00000022141	Nipbl	1
0.908272	6.19289	5.85008	0.000125817	0.00408623	1.33884	ENSMUSG00000022892	App	1
0.908601	4.84362	5.28435	0.00028762	0.00648322	0.607638	ENSMUSG00000030754	Copb1	1
0.909527	4.35609	4.41332	0.0011225	0.0132482	-0.700675	ENSMUSG00000022568	Scrib	1
0.910261	4.60109	4.63477	0.00078606	0.0107238	-0.372968	ENSMUSG00000031790	Mmp15	1
0.912256	2.68676	3.2655	0.00783307	0.0426181	-2.36797	ENSMUSG00000031095	Cul4b	1
0.91725	3.65824	3.29664	0.0074183	0.0411104	-2.45826	ENSMUSG00000029505	Ep400	1
0.917875	3.15659	3.28625	0.00755413	0.0416979	-2.40539	ENSMUSG00000040363	Bcor	1
0.919368	3.23121	3.54179	0.00484629	0.0321612	-1.99028	ENSMUSG00000044313	Mab21l3	1
0.919425	4.94224	5.74377	0.000146462	0.00437412	1.27545	ENSMUSG00000030720	Cln3	1
0.921717	4.23531	3.13889	0.00977845	0.0491714	-2.81178	ENSMUSG00000023830	Igf2r	1
0.922835	3.53596	4.04166	0.00207135	0.0192532	-1.20553	ENSMUSG00000046223	Plaur	1
0.923271	5.27234	4.79911	0.000606082	0.00934496	-0.182458	ENSMUSG00000028382	Ptbp3	1
0.924593	5.2147	4.0211	0.00214384	0.0197135	-1.44793	ENSMUSG00000000275	Trim25	1
0.925064	5.72269	3.13157	0.00990478	0.0495819	-3.04397	ENSMUSG00000020467	Efemp1	1
0.927841	5.16136	4.5961	0.000836114	0.011152	-0.495578	ENSMUSG00000072825	Cep170b	1
0.93031	7.40232	6.58949	4.56295e-05	0.00250109	2.33263	ENSMUSG00000005087	Cd44	1
0.930517	3.14276	4.17329	0.00166394	0.0168816	-0.953217	ENSMUSG00000003226	Ranbp2	1
0.935549	3.29682	4.25407	0.00145625	0.0155758	-0.837779	ENSMUSG00000018377	Vezf1	1
0.936612	3.38453	3.35134	0.00674332	0.0387938	-2.32393	ENSMUSG00000021171	Esyt2	1
0.936818	3.63641	4.21474	0.00155376	0.0161464	-0.937957	ENSMUSG00000042211	Fbxo38	1
0.937168	3.78272	4.22879	0.00151816	0.0159454	-0.93107	ENSMUSG00000034042	Gpbp1l1	1
0.937458	3.39547	4.25023	0.00146549	0.0156073	-0.855532	ENSMUSG00000034621	Gpatch8	1
0.938883	4.53601	5.80898	0.000133404	0.00423405	1.39847	ENSMUSG00000061731	Ext1	1
0.939746	9.48893	7.27654	1.89405e-05	0.00163274	3.22148	ENSMUSG00000061232	H2-K1	1
0.941266	3.76845	3.60243	0.00436538	0.0301213	-1.96372	ENSMUSG00000036459	Wtip	1
0.94149	2.93442	3.39072	0.00629659	0.0370677	-2.20072	ENSMUSG00000046962	Zbtb21	1
0.942261	3.315	4.28354	0.00138742	0.0150871	-0.795785	ENSMUSG00000041915	Ammecr1l	1
0.943437	3.2179	3.92083	0.00253732	0.021723	-1.36389	ENSMUSG00000056342	Usp34	1
0.944319	4.50795	4.56242	0.000882435	0.0114583	-0.475334	ENSMUSG00000004319	Clcn3	1
0.944642	4.46575	4.55685	0.000890355	0.0115159	-0.480762	ENSMUSG00000025326	Ube3a	1
0.945241	3.04578	3.47438	0.00544549	0.0343639	-2.07159	ENSMUSG00000075256	Cerkl	1
0.9458	6.78917	3.45458	0.00563559	0.0351394	-2.5646	ENSMUSG00000064368	mt-Nd6	1
0.946746	3.54877	3.87624	0.0027358	0.0226851	-1.47931	ENSMUSG00000004565	Pnpla6	1
0.94785	3.29055	4.34362	0.00125743	0.0142092	-0.696404	ENSMUSG00000025764	Jade1	1
0.948392	3.58752	4.29451	0.00136268	0.0149521	-0.802397	ENSMUSG00000034354	Mtmr3	1
0.948503	4.68174	3.29886	0.00738962	0.0410176	-2.60643	ENSMUSG00000002983	Relb	1
0.95036	2.94385	3.91279	0.00257196	0.0219092	-1.34911	ENSMUSG00000029722	Agfg2	1
0.952887	3.97608	4.05894	0.00201241	0.0188971	-1.22996	ENSMUSG00000055415	Atp10b	1
0.952926	5.34609	4.80553	0.000600006	0.00929299	-0.18106	ENSMUSG00000003534	Ddr1	1
0.955199	3.36977	4.70584	0.00070213	0.0101642	-0.143265	ENSMUSG00000034820	Cpsf7	1
0.955809	3.90809	4.39391	0.00115848	0.0134761	-0.681156	ENSMUSG00000039960	Rhou	1
0.955918	2.89062	3.25394	0.00799312	0.0430626	-2.41877	ENSMUSG00000033237	Arid2	1
0.958468	3.0485	3.68585	0.00378299	0.0273099	-1.72768	ENSMUSG00000039456	Morc3	1
0.958997	4.33418	5.15816	0.00034802	0.00707263	0.46623	ENSMUSG00000003316	Glg1	1
0.959864	6.85601	6.18611	7.8633e-05	0.00323698	1.79107	ENSMUSG00000056708	Ier5	1
0.959962	3.49565	3.41462	0.00604032	0.0364121	-2.23175	ENSMUSG00000020694	Tlk2	1
0.960224	2.50157	3.44846	0.00569579	0.0352325	-2.0532	ENSMUSG00000041688	Amot	1
0.962558	3.30856	3.82338	0.00299218	0.0238161	-1.536	ENSMUSG00000036098	Myrf	1
0.963286	6.71389	6.07088	9.22251e-05	0.0035994	1.6332	ENSMUSG00000026639	Lamb3	1
0.963314	6.06373	3.64353	0.00406766	0.0287456	-2.18696	ENSMUSG00000036620	Mgat4b	1
0.965299	4.66231	5.62098	0.000174903	0.00479605	1.12106	ENSMUSG00000020271	Fbxw11	1
0.966719	2.19866	3.20606	0.00869177	0.0454569	-2.41065	ENSMUSG00000052563	D930048N14Rik	1
0.968002	2.67842	3.34201	0.00685382	0.0392161	-2.243	ENSMUSG00000032584	Mst1r	1
0.968008	4.08693	4.11886	0.00182118	0.017669	-1.14445	ENSMUSG00000022971	Ifnar2	1
0.968181	4.77915	4.91703	0.000504118	0.00853954	0.0530629	ENSMUSG00000032232	Cgnl1	1
0.968715	5.19026	5.39538	0.000243667	0.00585712	0.745987	ENSMUSG00000025579	Gaa	1
0.971316	2.67641	3.26584	0.00782854	0.0426103	-2.37237	ENSMUSG00000024773	Atg2a	1
0.972372	2.75876	3.6206	0.00423104	0.0295056	-1.80188	ENSMUSG00000038914	Dido1	1
0.973477	7.46209	3.51212	0.00510121	0.0330673	-2.48838	ENSMUSG00000003617	Cp	1
0.973819	4.14391	4.12527	0.00180189	0.0175687	-1.14454	ENSMUSG00000071856	Mcc	1
0.974097	4.96012	4.99094	0.000449592	0.00802143	0.150451	ENSMUSG00000020580	Rock2	1
0.974372	6.03393	5.8642	0.000123318	0.0040237	1.37037	ENSMUSG00000022636	Alcam	1
0.974836	3.33919	3.9212	0.00253574	0.021723	-1.37393	ENSMUSG00000021188	Trip11	1
0.975155	3.28136	3.31152	0.00722818	0.0404154	-2.37822	ENSMUSG00000030451	Herc2	1
0.975972	4.58072	3.77121	0.00326981	0.0250361	-1.78584	ENSMUSG00000039934	Gsap	1
0.976017	2.74849	3.1282	0.00996355	0.0498045	-2.60622	ENSMUSG00000062627	Mysm1	1
0.976433	3.00519	3.49292	0.00527344	0.0336645	-2.04087	ENSMUSG00000021559	Dapk1	1
0.976927	3.1683	3.92914	0.00250203	0.0215254	-1.34498	ENSMUSG00000045314	Sowahb	1
0.977353	2.16307	3.19085	0.00892662	0.0461377	-2.43027	ENSMUSG00000000708	Kat2b	1
0.97928	2.35992	3.53079	0.00493923	0.0325095	-1.90785	ENSMUSG00000063382	Bcl9l	1
0.979867	3.53573	4.37502	0.00119466	0.0136996	-0.670211	ENSMUSG00000037243	Zfp692	1
0.980571	4.03252	4.18721	0.00162606	0.0166708	-1.02337	ENSMUSG00000000194	Gpr107	1
0.98078	3.96125	5.0338	0.000420871	0.00775057	0.310079	ENSMUSG00000039219	Arid4b	1
0.981396	8.88258	4.53846	0.000917035	0.011665	-0.757161	ENSMUSG00000018920	Cxcl16	1
0.982231	3.21532	3.88215	0.00270863	0.022607	-1.42779	ENSMUSG00000057133	Chd6	1
0.982318	3.89398	4.47524	0.00101538	0.0123994	-0.5488	ENSMUSG00000022270	Retreg1	1
0.985091	3.27219	3.54212	0.00484351	0.0321612	-1.99079	ENSMUSG00000049313	Sorl1	1
0.985258	6.05124	7.26144	1.9298e-05	0.00163652	3.24618	ENSMUSG00000031841	Cdh13	1
0.985293	4.40322	5.98369	0.000104176	0.00379141	1.65081	ENSMUSG00000019907	Ppp1r12a	1
0.986026	2.50687	3.36506	0.00658409	0.0381196	-2.18941	ENSMUSG00000025241	Fyco1	1
0.986325	4.13364	3.63802	0.00410633	0.0288704	-1.95534	ENSMUSG00000022708	Zbtb20	1
0.986998	6.70258	7.16594	2.17355e-05	0.00173606	3.10438	ENSMUSG00000061665	Cd2ap	1
0.987358	2.8834	3.8753	0.00274019	0.0226851	-1.40393	ENSMUSG00000049606	Zfp644	1
0.987556	4.37491	4.7876	0.000617148	0.00944141	-0.103961	ENSMUSG00000026880	Stom	1
0.989895	3.79389	4.55202	0.000897288	0.0115313	-0.416628	ENSMUSG00000037410	Tbc1d2b	1
0.990589	4.35154	4.80879	0.000596945	0.0092715	-0.0694193	ENSMUSG00000017119	Nbr1	1
0.990738	2.29774	3.20549	0.00870043	0.0454792	-2.42096	ENSMUSG00000031631	Cfap97	1
0.991371	6.35779	6.15487	8.2092e-05	0.00333663	1.7665	ENSMUSG00000041891	Lman1	1
0.991791	7.77057	5.39421	0.000244092	0.00585712	0.608305	ENSMUSG00000039195	1110008P14Rik	1
0.99191	3.46529	4.86117	0.000549945	0.00897522	0.0855047	ENSMUSG00000044037	Als2cl	1
0.991914	3.02755	3.18386	0.00903667	0.0465488	-2.55267	ENSMUSG00000038352	Arl5c	1
0.992592	2.82735	4.16067	0.00169909	0.0169907	-0.946729	ENSMUSG00000033991	Ttc37	1
0.994112	3.01965	3.39274	0.00627451	0.0370272	-2.20235	ENSMUSG00000029729	Zkscan1	1
0.9942	3.56746	4.69565	0.000713557	0.0102648	-0.172044	ENSMUSG00000052748	Swt1	1
0.99442	2.3079	3.26681	0.00781521	0.0426037	-2.32331	ENSMUSG00000056268	Dennd1b	1
0.99537	3.85234	5.31379	0.000275199	0.00631741	0.732646	ENSMUSG00000023977	Ubr2	1
0.995502	3.11046	3.90059	0.00262552	0.0221555	-1.38562	ENSMUSG00000025332	Kdm5c	1
0.995702	4.46684	4.16218	0.00169484	0.0169851	-1.11797	ENSMUSG00000045962	Wnk1	1
0.996756	5.83042	4.83109	0.00057644	0.0091826	-0.182815	ENSMUSG00000024580	Grpel2	1
0.997374	4.18179	4.39924	0.00114848	0.0134051	-0.699133	ENSMUSG00000022201	Zfr	1
0.998172	3.31168	4.19944	0.00159352	0.0164445	-0.926221	ENSMUSG00000042207	Kdm5b	1
0.99829	4.1318	5.74869	0.000145432	0.00437186	1.33793	ENSMUSG00000036718	Micall2	1
0.999967	4.29795	4.6508	0.000766246	0.0106132	-0.312406	ENSMUSG00000038538	Ubn2	1
1.00017	1.95398	3.31918	0.00713217	0.0400907	-2.2092	ENSMUSG00000021936	Mapk8	1
1.0017	4.98097	5.65299	0.000166961	0.0046906	1.14182	ENSMUSG00000025060	Slk	1
1.00525	12.0723	4.59448	0.000838275	0.01117	-0.633174	ENSMUSG00000064339	mt-Rnr2	1
1.00883	7.49831	4.13117	0.00178432	0.0174986	-1.42335	ENSMUSG00000003541	Ier3	1
1.00908	8.98405	4.98674	0.000452522	0.00802589	-0.0324936	ENSMUSG00000064345	mt-Nd2	1
1.00935	3.29144	3.97929	0.00229956	0.0204739	-1.27819	ENSMUSG00000040209	Zfp704	1
1.01004	5.91848	4.72813	0.000677804	0.0100018	-0.354845	ENSMUSG00000022884	Eif4a2	1
1.01033	3.7911	4.74605	0.000658889	0.00979633	-0.112556	ENSMUSG00000024885	Aldh3b1	1
1.01055	9.15044	4.55272	0.000896278	0.0115291	-0.733077	ENSMUSG00000026864	Hspa5	1
1.01213	5.54867	3.59311	0.00443592	0.0303943	-2.21199	ENSMUSG00000002325	Irf9	1
1.01231	3.33318	4.46047	0.00103991	0.0126428	-0.515724	ENSMUSG00000032637	Atxn2l	1
1.01291	11.0024	5.4784	0.000215497	0.00545211	0.744783	ENSMUSG00000102070	Gm28661	1
1.01314	3.44328	4.17837	0.00165002	0.016816	-0.973747	ENSMUSG00000030199	Etv6	1
1.01404	4.39085	5.23399	0.000310268	0.00674001	0.574947	ENSMUSG00000020097	Sgpl1	1
1.01524	3.35293	3.54926	0.00478425	0.031903	-1.99373	ENSMUSG00000024431	Nr3c1	1
1.01709	2.68323	3.50374	0.00517567	0.0333525	-1.97952	ENSMUSG00000024143	Rhoq	1
1.01867	6.70952	8.44529	4.81178e-06	0.00088139	4.62256	ENSMUSG00000026223	Itm2c	1
1.01897	4.83829	4.17244	0.00166628	0.0168816	-1.14816	ENSMUSG00000018906	P4ha2	1
1.02009	3.21294	3.4356	0.00582428	0.0356887	-2.15955	ENSMUSG00000039116	Adgrg6	1
1.02205	2.10987	3.16146	0.00939868	0.0478751	-2.47198	ENSMUSG00000033382	Trappc8	1
1.02328	3.436	4.59678	0.000835201	0.011152	-0.314527	ENSMUSG00000026883	Dab2ip	1
1.02421	2.20406	3.15187	0.0095582	0.0484541	-2.49718	ENSMUSG00000043003	Rasef	1
1.02827	2.88339	3.42053	0.00597869	0.0362308	-2.14486	ENSMUSG00000022701	Ccdc191	1
1.02926	4.25942	3.48817	0.00531701	0.0338273	-2.22538	ENSMUSG00000022387	Brd1	1
1.02974	3.05262	4.06768	0.00198326	0.0187234	-1.11113	ENSMUSG00000026773	Pfkfb3	1
1.03008	3.39171	4.43809	0.00107828	0.0129828	-0.556914	ENSMUSG00000025268	Maged2	1
1.03167	3.09941	3.93639	0.00247166	0.0213558	-1.32554	ENSMUSG00000038884	A230050P20Rik	1
1.03321	6.11981	5.77851	0.000139343	0.0043212	1.24227	ENSMUSG00000056216	Cebpg	1
1.03445	3.24652	3.5037	0.00517598	0.0333525	-2.04869	ENSMUSG00000026743	Mllt10	1
1.03514	8.11349	4.19599	0.00160262	0.016492	-1.32479	ENSMUSG00000028124	Gclm	1
1.03554	2.11477	3.1258	0.0100057	0.0499668	-2.532	ENSMUSG00000019984	Med23	1
1.03698	2.48971	3.2437	0.00813746	0.0435498	-2.37688	ENSMUSG00000067336	Bmpr2	1
1.03855	6.54979	6.19535	7.76393e-05	0.00322238	1.81546	ENSMUSG00000042675	Ypel3	1
1.0395	3.37876	4.00731	0.00219398	0.0199909	-1.23999	ENSMUSG00000045795	Whamm	1
1.03972	1.99706	3.27862	0.00765561	0.0420355	-2.27626	ENSMUSG00000034801	Sos2	1
1.0405	2.79137	3.34575	0.00680934	0.0390755	-2.24542	ENSMUSG00000035517	Tdrd7	1
1.04104	4.88561	6.54054	4.86892e-05	0.00257266	2.37688	ENSMUSG00000000631	Myo18a	1
1.04314	4.47763	4.52142	0.000942511	0.0118465	-0.537595	ENSMUSG00000028059	Arhgef2	1
1.04376	3.30462	3.63242	0.00414596	0.0290302	-1.8439	ENSMUSG00000042605	Atxn2	1
1.04398	4.96606	5.68141	0.000160232	0.00459373	1.18479	ENSMUSG00000052684	Jun	1
1.04424	4.78218	5.71705	0.0001522	0.00448081	1.25244	ENSMUSG00000040600	Eps8l3	1
1.04584	4.69056	3.80548	0.00308457	0.0241457	-1.74298	ENSMUSG00000002083	Bbc3	1
1.04903	4.49226	4.83831	0.000569959	0.00916873	-0.0389122	ENSMUSG00000047417	Rexo1	1
1.0491	3.04021	4.09624	0.00189105	0.0180925	-1.06513	ENSMUSG00000003435	Supt5	1
1.05298	5.52396	3.96331	0.00236215	0.0207754	-1.57755	ENSMUSG00000028982	Slc25a33	1
1.05321	7.36461	8.38718	5.13335e-06	0.000889716	4.54988	ENSMUSG00000030659	Nucb2	1
1.05444	4.87863	6.00193	0.000101546	0.00375474	1.64718	ENSMUSG00000019889	Ptprk	1
1.05912	4.8452	3.25883	0.007925	0.0428636	-2.70126	ENSMUSG00000024521	Pmaip1	1
1.05935	3.12581	4.59125	0.000842617	0.0111846	-0.300479	ENSMUSG00000037997	Parp11	1
1.06214	4.18094	4.71115	0.000696251	0.0101289	-0.202835	ENSMUSG00000025261	Huwe1	1
1.06313	3.34725	4.03854	0.00208218	0.0193147	-1.1849	ENSMUSG00000024283	Wac	1
1.06372	2.42912	3.72917	0.00351288	0.0261721	-1.59709	ENSMUSG00000021838	Samd4	1
1.06446	3.33789	4.65019	0.000766992	0.0106132	-0.223568	ENSMUSG00000019951	Uhrf1bp1l	1
1.07122	2.74064	3.42753	0.0059064	0.0360152	-2.10387	ENSMUSG00000059474	Mbtd1	1
1.07123	1.71687	3.26092	0.00789612	0.0427579	-2.28223	ENSMUSG00000019944	Rhobtb1	1
1.0735	8.81431	4.60362	0.000826116	0.0111061	-0.649818	ENSMUSG00000001123	Lgals9	1
1.07357	2.70565	3.40151	0.0061795	0.0367736	-2.15232	ENSMUSG00000033389	Arhgap44	1
1.07373	2.42447	3.44534	0.00572664	0.0352993	-2.04659	ENSMUSG00000024070	Prkd3	1
1.07427	3.76329	5.00187	0.000442076	0.0079683	0.278971	ENSMUSG00000048271	Rbm33	1
1.07529	2.70356	3.63711	0.00411274	0.0289007	-1.76873	ENSMUSG00000075012	Fjx1	1
1.07616	4.63541	5.75772	0.000143558	0.00437186	1.31932	ENSMUSG00000079036	Alkbh1	1
1.07752	8.30538	5.9241	0.00011329	0.00386199	1.3915	ENSMUSG00000083863	Gm13341	1
1.07768	2.59059	3.45698	0.00561224	0.035094	-2.04415	ENSMUSG00000014496	Ankrd28	1
1.07917	3.44363	4.75366	0.00065103	0.00973774	-0.0734986	ENSMUSG00000010453	Kansl3	1
1.08407	3.50878	3.98085	0.00229356	0.0204452	-1.2945	ENSMUSG00000066621	Tecpr1	1
1.08427	4.57789	4.57394	0.000866291	0.0113401	-0.465549	ENSMUSG00000038039	Gcc2	1
1.08429	2.58528	3.75675	0.00335134	0.0253528	-1.5647	ENSMUSG00000002428	Hltf	1
1.08472	1.82539	3.49213	0.00528068	0.0336797	-1.93092	ENSMUSG00000109946	Brd3os	1
1.08474	2.72757	4.19716	0.00159953	0.0164755	-0.883807	ENSMUSG00000042105	Inpp5f	1
1.08496	3.69636	4.62124	0.000803204	0.0108606	-0.293997	ENSMUSG00000041439	Mfsd6	1
1.0851	1.97165	3.69345	0.00373406	0.0270562	-1.62616	ENSMUSG00000062563	Cys1	1
1.08552	4.3103	4.21942	0.00154182	0.0160675	-1.00351	ENSMUSG00000021097	Clmn	1
1.08731	3.01481	3.28309	0.00759594	0.0418249	-2.38578	ENSMUSG00000035437	Rabgap1	1
1.08732	3.88907	5.1927	0.000330252	0.00692672	0.554076	ENSMUSG00000029602	Rasal1	1
[truncated: 752 more rows]
